# Supplementary material
Source: PubMed Central journal article supplement (PMC2765496)
Supplement: NIHMS108673-supplement-1_si_001.pdf [file NIHMS108673-supplement-1_si_001.pdf]

# Probing the Mechanism of Electron Capture and Electron Transfer Dissociation Using Tags with Variable Electron Affinity

*Chang Ho Sohn<sup>\*</sup>, Cheol K. Chung<sup>\*</sup>, Sheng Yin<sup>†</sup>, Prasanna Ramachandran<sup>†</sup>, Joseph A.*

*Loo<sup>†</sup> and J. L. Beauchamp<sup>\*‡</sup>*

<sup>\*</sup>Division of Chemistry and Chemical Engineering, California Institute of Technology, Pasadena, California 91125

<sup>†</sup>Department of Chemistry and Biochemistry, University of California, Los Angeles, California 90095

<sup>‡</sup>To whom correspondence should be addressed: E-mail: [jlbechamp@caltech.edu](mailto:jlbechamp@caltech.edu)

## Table of Contents

1.  $^1\text{H}$ -NMR peaks of thiol compounds
2. Synthesis of 3,5-dicyanobenzyl thiol
3. ECD, IRMPD/ECD spectra of 2-nitrobenzyl and 4-nitrobenzyl containing peptides
4. ECD, IRMPD/ECD spectra of  $N_{\alpha}$ -3,5-dinitrophenyl derivatized peptides
5. Energies and geometries of dicyanobenzene, protonated dicyanobenzene, dicyanobenzene anion radical and a hydrogen attached dicyanobenzene radical optimized at the (U)B3LYP/6-31+G(d,p) level of theory
6. Energies and geometries of N-phenethylacetamide, N-(4-cyanophenethyl)acetamide, N-(perfluorophenethyl)acetamide, N-(3,5-dicyanophenethyl)acetamide, N-(3-nitrophenethyl)acetamide, N-(3,5-dinitrophenethyl)acetamide and their methyl ammonium complexes optimized at the B3LYP/6-31++G(d,p) level of theory
7. Energies and molecular orbitals of excited states of anionic radicals of N-phenethylacetamide, N-(4-cyanophenethyl)acetamide, N-(perfluorophenethyl)acetamide, N-(3,5-dicyanophenethyl)acetamide, N-(3-nitrophenethyl)acetamide, N-(3,5-dinitrophenethyl)acetamide and neutralized radicals of their methyl ammonium complexes obtained by the time-dependent density functional calculations at the UB3LYP/6-31++G(d,p) and UB3LYP/6-311++G(2df,p) level of theories

## 1. $^1\text{H-NMR}$ peaks of thiol compounds

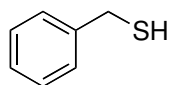

$^1\text{H-NMR}$  (CDCl<sub>3</sub>)  $\delta$  7.34-7.26 (m, 5H), 3.75 (d,  $J = 7.5$  Hz, 2H), 1.77 (t,  $J = 7.5$  Hz, 1H).

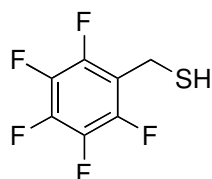

$^1\text{H-NMR}$  (CDCl<sub>3</sub>)  $\delta$  3.77 (dt,  $J = 8.5, 1.4$  Hz, 2H), 2.07 (s, 1H).

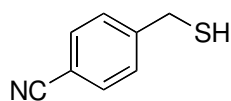

$^1\text{H-NMR}$  (CDCl<sub>3</sub>)  $\delta$  7.59 (d,  $J = 8.4$  Hz, 2H), 7.42 (d,  $J = 8.4$  Hz, 2H), 3.75 (d,  $J = 7.8$  Hz, 2H), 1.80 (s, 1H).

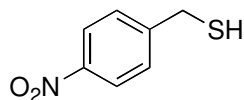

$^1\text{H-NMR}$  (CDCl<sub>3</sub>)  $\delta$  8.16 (d,  $J = 8.7$  Hz, 2H), 7.48 (d,  $J = 8.7$  Hz, 2H), 3.80 (d,  $J = 8.1$  Hz, 2H), 1.83 (t,  $J = 8.1$  Hz, 1H).

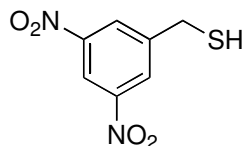

$^1\text{H-NMR}$  (DMSO-*d*<sub>6</sub>)  $\delta$  8.71-8.68 (m, 3H), 4.01 (d,  $J = 8.2$  Hz, 2H), 3.41 (t,  $J = 8.2$  Hz, 2H).

## 2. Synthesis of 3,5-dicyanobenzyl thiol

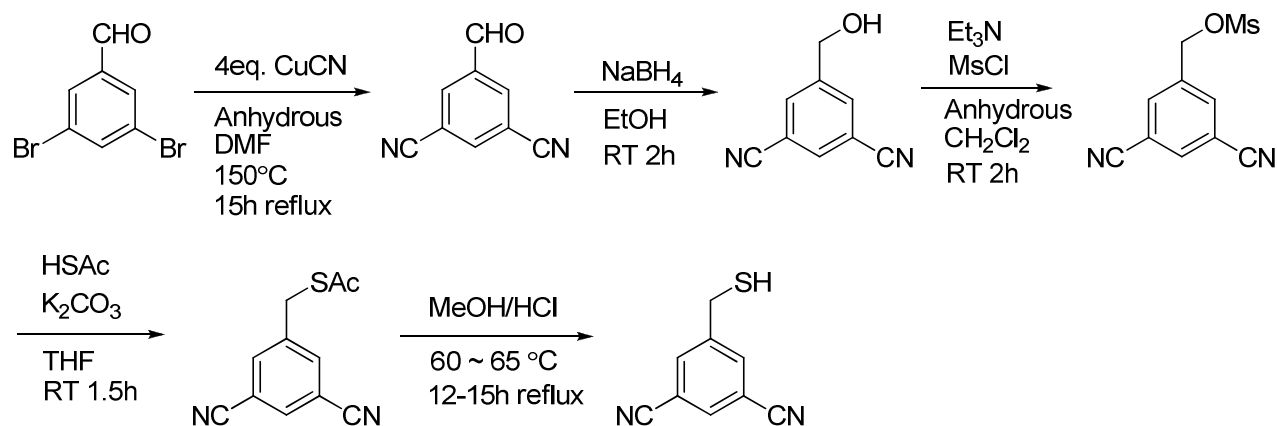

Scheme S1

### a) Synthesis of 3,5-dicyanobenzaldehyde

The literature procedure was followed with a minor modification.<sup>1</sup> A solution of 3,5-dibromobenzaldehyde in anhydrous DMF (~0.25 M) was added copper cyanide (4 equiv.), and the resulting mixture was stirred at 150 °C for 15 h. The solvent was removed under vacuum and the residue was reconstituted in CH<sub>2</sub>Cl<sub>2</sub> and filtered 3 times using Celite. The solvent was removed under vacuum and the residue was washed with diethyl ether 3 times. The filtrate was evaporated under vacuum to give the title compound as a yellow solid. The spectral data were in accordance with the literature.

### b) Synthesis of 3,5-dicyanobenzyl alcohol

A solution of 3,5-dicyanobenzaldehyde in EtOH was added sodium borohydride (1.2 equiv.) slowly at 0°C and the resulting solution was stirred while it was slowly warmed to room temperature for 2h. After the solvent was removed, the residue was dissolved in ethyl acetate, and washed with HCl (aq. 1N). The organic layer was separated, dried over anhydrous magnesium sulfate, and evaporated under vacuum. The crude product was purified by flash column chromatography (silica gel, eluent: EtOAc/Hexanes = 1/1 ~ 4/1) to give 3,5-dicyanobenzyl alcohol as a white solid. <sup>1</sup>H-NMR (CDCl<sub>3</sub>) δ 7.91 (s, 2H), 7.86 (s, 1H), 4.83 (d, *J* = 5.5 Hz, 2H), 2.03 (t, *J* = 5.5 Hz, 1H).

### c) Synthesis of 3,5-dicyanobenzyl methane sulfonate

A mixture of 3,5-dicyanobenzyl alcohol, methanesulfonyl chloride (1.2 equiv.), and triethyl amine (1.5 equiv.) in anhydrous methylene chloride was stirred for 2 h at room temperature, after which time, the mixture was diluted with methylene chloride and washed successively with an aqueous solution of ammonium chloride, brine and water. The organic layer was dried over anhydrous magnesium sulfate. The crude product thus obtained was pure enough to use for the next reaction.  $^1\text{H-NMR}$  ( $\text{CDCl}_3$ )  $\delta$  7.96 (s, 1H), 7.93 (s, 2H), 5.28 (s, 2H), 3.13 (s, 3H).

d) Synthesis of 3,5-dicyanobenzyl thioacetate and 3,5-dicyanobenzyl thiol

The procedures in the main text were followed without any modification. 3,5-dicyanobenzyl thioacetate  $^1\text{H-NMR}$  ( $\text{CDCl}_3$ )  $\delta$  7.83-7.81 (m, 3H), 4.11 (s, 2H), 2.39 (s, 3H), 3,5-dicyanobenzyl thiol  $^1\text{H-NMR}$  ( $\text{CDCl}_3$ )  $\delta$  7.96-7.92 (m, 3H), 3.79 (d,  $J = 8.0$  Hz, 2H), 1.85 (t,  $J = 8.0$  Hz, 2H). Final product was derivatized to the model peptide via  $\beta$ -elimination under alkaline condition and subsequent Michael addition reaction. The exact mass of the derivatized peptide was determined by ESI-LTQ-FTMS at  $m/z$  1069.4432 for  $[\text{M}+2\text{H}]^{2+}$  (theoretical  $m/z$ : 1069.4420).

3. ECD and IRMPD/ECD spectra of 2-nitrobenzyl and 4-nitrobenzyl containing model peptides

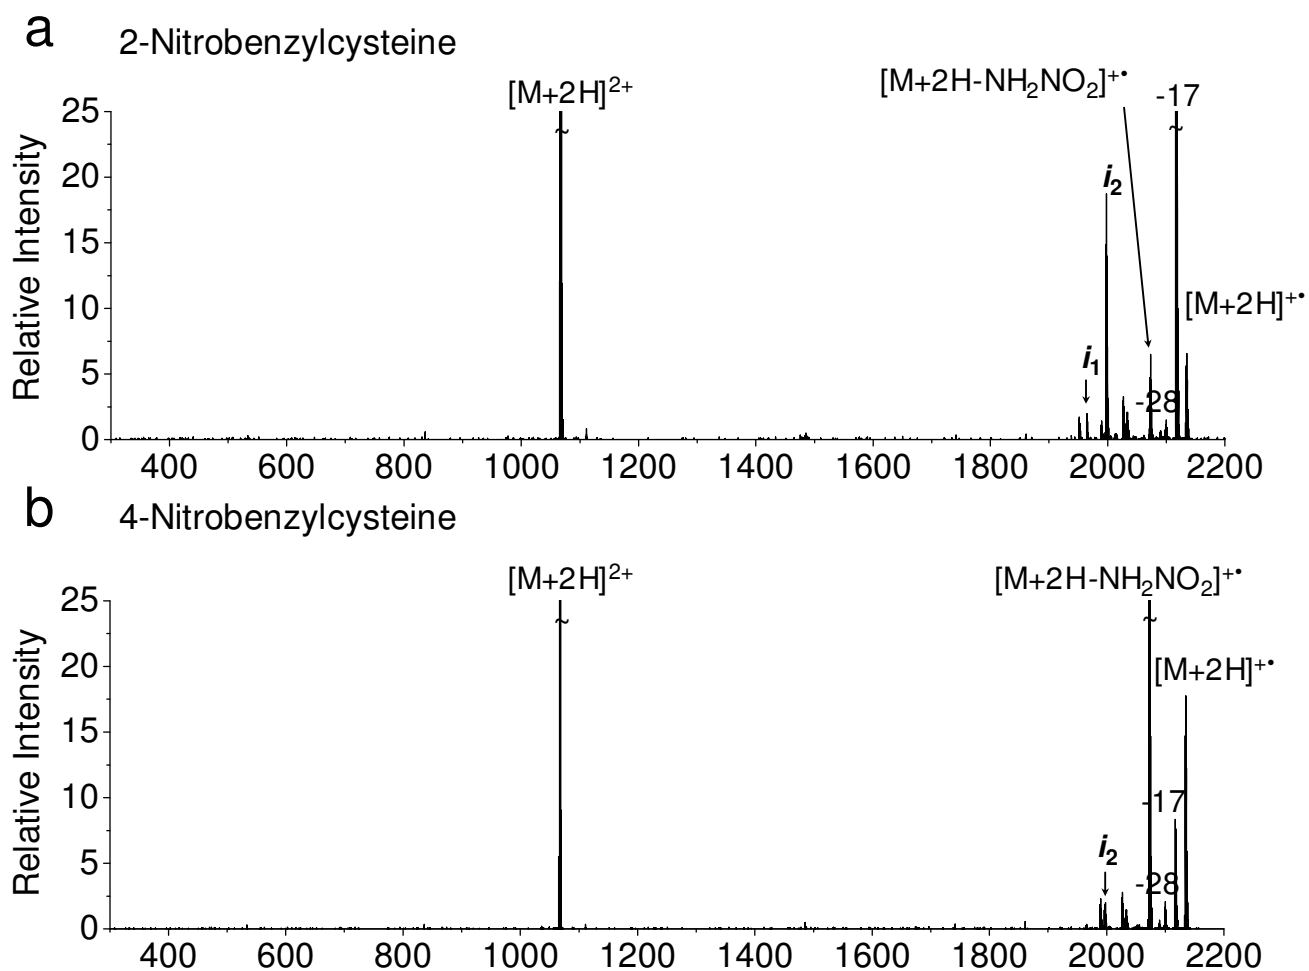

Figure S1-a and b. ECD of 2-nitrobenzyl and 4-nitrobenzyl containing model peptides.

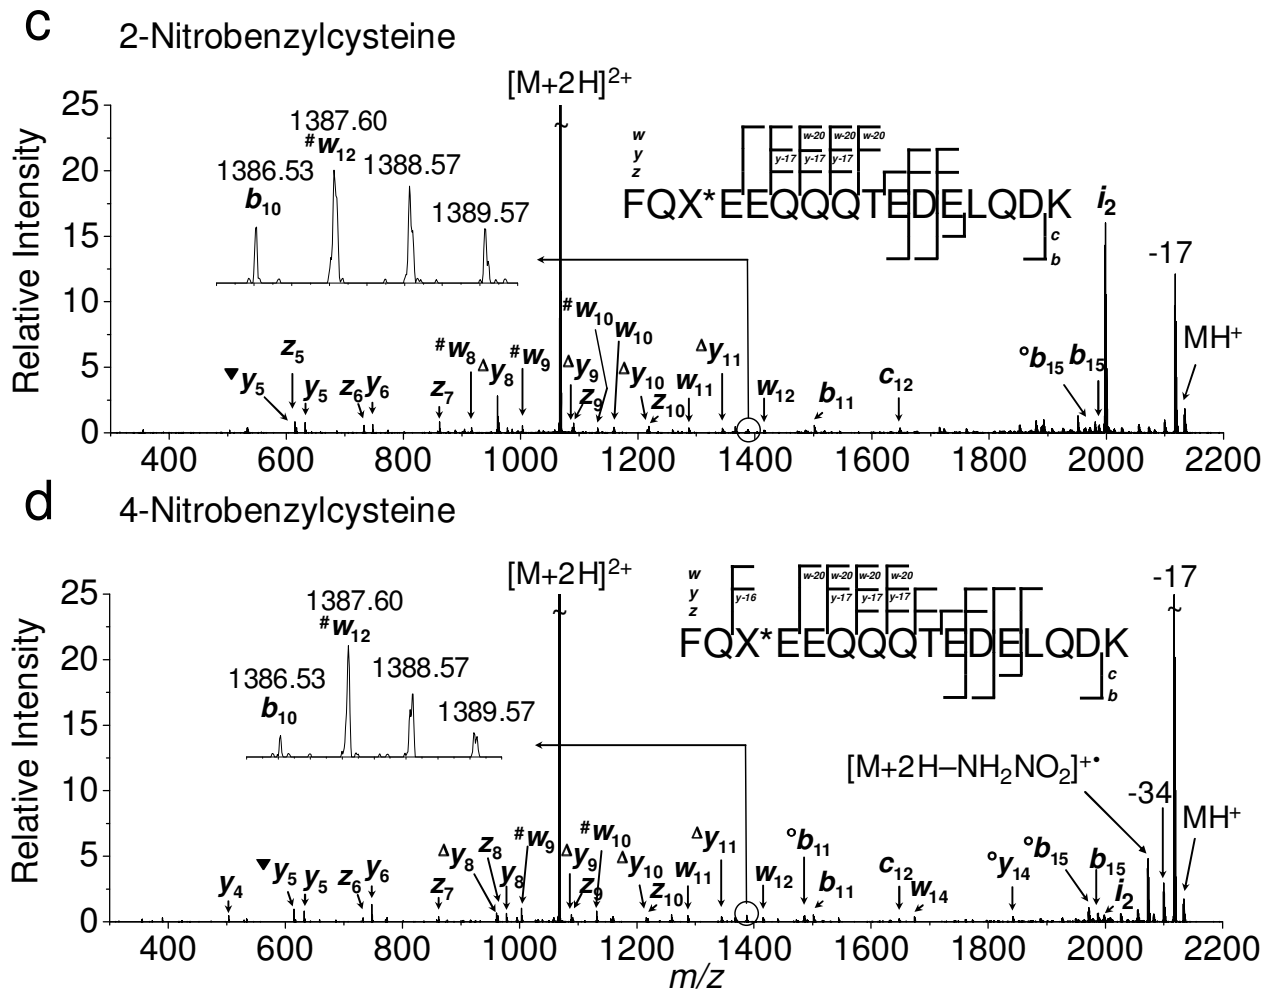

Figure S1-c and d. IRMPD/ECD of 2-nitrobenzyl and 4-nitrobenzyl containing model peptides.

#### 4. ECD, IRMPD/ECD spectra of N<sub>α</sub>-3,5-dinitrophenyl derivatized peptides

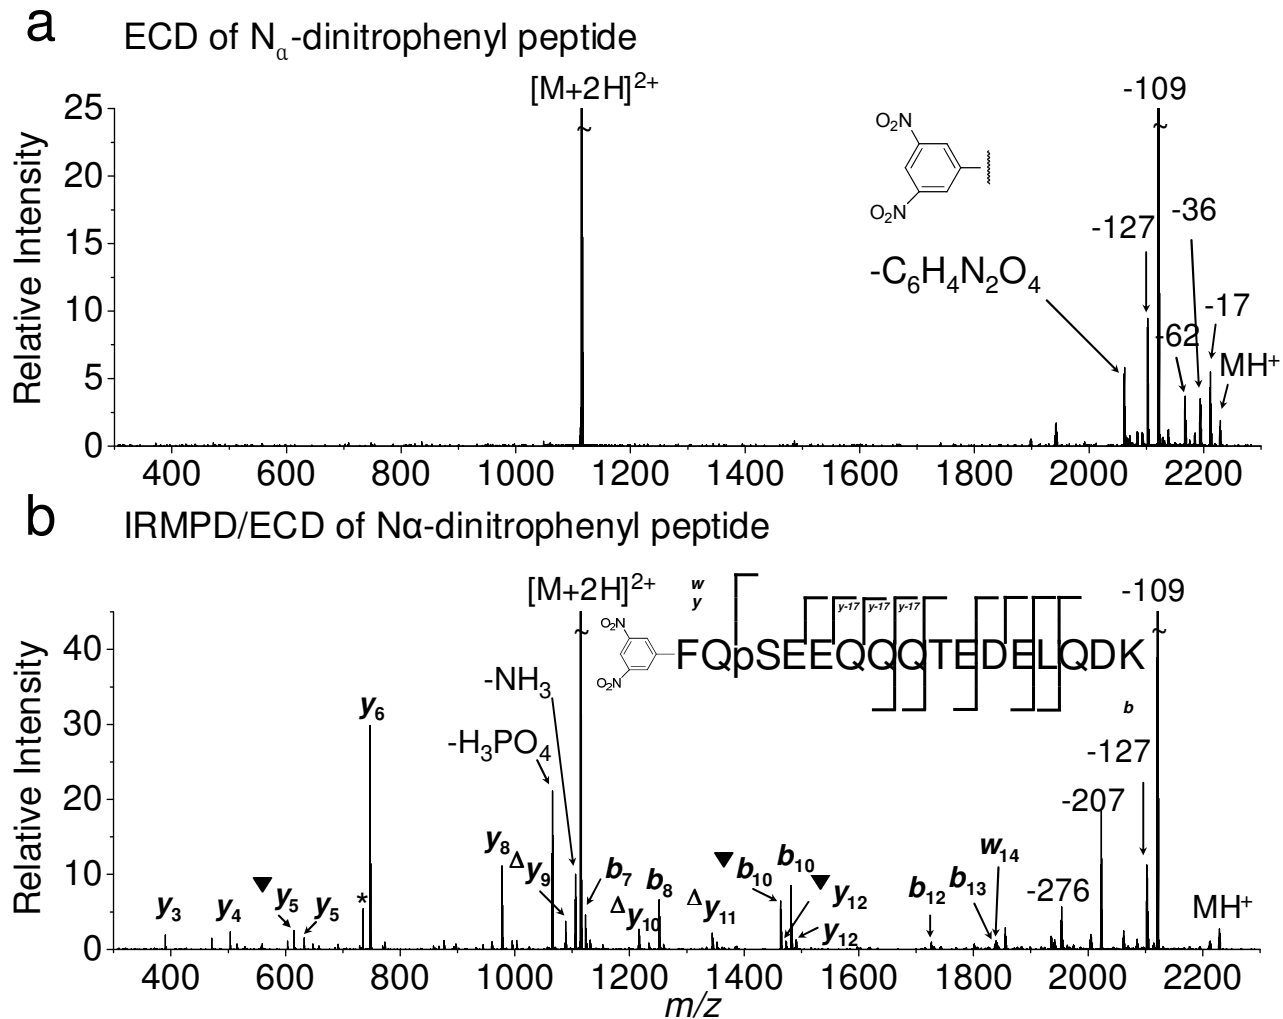

Figure S2. ECD, IRMPD/ECD spectra of N<sub>α</sub>-3,5-dinitrophenyl derivatized peptides



**5. Energies and geometries of dicyanobenzene, protonated dicyanobenzene, dicyanobenzene anion radical and a hydrogen attached dicyanobenzene radical optimized at the (U)B3LYP/6-31+G(d,p) level of theory**

Table S1. B3LYP/6-31+G(d,p) optimized geometry and energetics of dicyanobenzene (DCB).

| ATOM | CHARGE | X            | Y             | Z             |
|------|--------|--------------|---------------|---------------|
| C    | 6.0    | 0.0000000000 | 0.0000000000  | 2.0417300000  |
| C    | 6.0    | 0.0000000000 | 1.2099500000  | 1.3488000000  |
| C    | 6.0    | 0.0000000000 | 1.2104600000  | -0.0574400000 |
| C    | 6.0    | 0.0000000000 | -1.2099500000 | 1.3488000000  |
| C    | 6.0    | 0.0000000000 | -1.2104600000 | -0.0574400000 |
| C    | 6.0    | 0.0000000000 | 0.0000000000  | -0.7649100000 |
| H    | 1.0    | 0.0000000000 | 0.0000000000  | 3.1267100000  |
| H    | 1.0    | 0.0000000000 | 2.1532400000  | 1.8842100000  |
| H    | 1.0    | 0.0000000000 | -2.1532400000 | 1.8842100000  |
| H    | 1.0    | 0.0000000000 | 0.0000000000  | -1.8488500000 |
| C    | 6.0    | 0.0000000000 | -2.4549600000 | -0.7742300000 |
| C    | 6.0    | 0.0000000000 | 2.4549600000  | -0.7742300000 |
| N    | 7.0    | 0.0000000000 | 3.4651800000  | -1.3509200000 |
| N    | 7.0    | 0.0000000000 | -3.4651800000 | -1.3509200000 |

E[B3LYP/6-31+G(d,p)] = -416.7529215558 hartree

E[B3LYP/6-311+(2df,p)] = -416.871199001 hartree

E[MP2/6-311+G(2df,p)] = -415.8866585981 hartree

ZPE[B3LYP/6-31+G(d,p)] = 256.001 kJ/mol

Enthalpy Correction[B3LYP/6-31+G(d,p)] = 279.286 kJ/mol

Table S2. B3LYP/6-31+G(d,p) optimized geometry and energetics of protonated dicyanobenzene

(DCBH<sup>+</sup>).

| ATOM | CHARGE | X             | Y             | Z            |
|------|--------|---------------|---------------|--------------|
| C    | 6.0    | -0.2270469337 | -2.0607377696 | 0.0000000000 |
| C    | 6.0    | 1.0389940607  | -1.4889952163 | 0.0000000000 |
| C    | 6.0    | 1.1407715811  | -0.0762608828 | 0.0000000000 |
| C    | 6.0    | -1.3679435821 | -1.2526800966 | 0.0000000000 |
| C    | 6.0    | -1.2598715714 | 0.1537308066  | 0.0000000000 |
| C    | 6.0    | -0.0000947970 | 0.7563754893  | 0.0000000000 |
| H    | 1.0    | -0.3301262847 | -3.1403103784 | 0.0000000000 |
| H    | 1.0    | 1.9301166709  | -2.1073371915 | 0.0000000000 |
| H    | 1.0    | -2.3541937602 | -1.7053546596 | 0.0000000000 |
| H    | 1.0    | 0.0928424105  | 1.8367128207  | 0.0000000000 |
| C    | 6.0    | -2.4382846445 | 0.9725433811  | 0.0000000000 |
| C    | 6.0    | 2.4133962570  | 0.5201803991  | 0.0000000000 |
| N    | 7.0    | 3.4606743120  | 1.0088567345  | 0.0000000000 |
| N    | 7.0    | -3.3906790100 | 1.6383182065  | 0.0000000000 |
| H    | 1.0    | 4.3732452915  | 1.4374883570  | 0.0000000000 |

E[B3LYP/6-31+G(d,p)] = -417.0628515 hartree

E[B3LYP/6-311+(2df,p)] = -417.1823338 hartree

E[MP2/6-311+G(2df,p)] = -416.1857521 hartree

ZPE[B3LYP/6-31+G(d,p)] = 283.606 kJ/mol

Enthalpy Correction[B3LYP/6-31+G(d,p)] = 308.484 kJ/mol

Table S3. UB3LYP/6-31+G(d,p) optimized geometry and energetics of dicyanobenzene anion (**DCB<sup>-</sup>**).

| ATOM | CHARGE | X            | Y             | Z             |
|------|--------|--------------|---------------|---------------|
| C    | 6.0    | 0.0000000000 | -0.0000000001 | 2.0961482218  |
| C    | 6.0    | 0.0000000000 | 1.2246717477  | 1.4282494957  |
| C    | 6.0    | 0.0000000000 | 1.2259394174  | -0.0298578321 |
| C    | 6.0    | 0.0000000000 | -1.2246717378 | 1.4282494997  |
| C    | 6.0    | 0.0000000000 | -1.2259394133 | -0.0298578225 |
| C    | 6.0    | 0.0000000000 | 0.0000000063  | -0.7124031644 |
| H    | 1.0    | 0.0000000000 | -0.0000000033 | 3.1856841429  |
| H    | 1.0    | 0.0000000000 | 2.1650218994  | 1.9680970353  |
| H    | 1.0    | 0.0000000000 | -2.1650218949 | 1.9680970291  |
| H    | 1.0    | 0.0000000000 | -0.0000000014 | -1.7991413383 |
| C    | 6.0    | 0.0000000000 | -2.4395336105 | -0.7562397348 |
| C    | 6.0    | 0.0000000000 | 2.4395335370  | -0.7562396933 |
| N    | 7.0    | 0.0000000000 | 3.4630527486  | -1.3353163831 |
| N    | 7.0    | 0.0000000000 | -3.4630526952 | -1.3353163532 |

E[UB3LYP/6-31+G(d,p)] = -416.7883736 hartree

E[UB3LYP/6-311+(2df,p)] = -416.9074846 hartree

E[ROMP2/6-311+G(2df,p)] = -415.9113402 hartree

ZPE[UB3LYP/6-31+G(d,p)] = 244.453 kJ/mol

Enthalpy Correction[UB3LYP/6-31+G(d,p)] = 268.831 kJ/mol

Table S4. UB3LYP/6-31+G(d,p) optimized geometry and energetics of hydrogen atom attached dicyanobenzene (DCBH\*).

| ATOM | CHARGE | X             | Y             | Z             |
|------|--------|---------------|---------------|---------------|
| C    | 6.0    | -0.0921524176 | 2.0542348981  | 0.0473576881  |
| C    | 6.0    | 1.1280600132  | 1.3932372497  | -0.0535294093 |
| C    | 6.0    | 1.1697412859  | -0.0209686527 | -0.1190331531 |
| C    | 6.0    | -1.2926928872 | 1.3406758715  | 0.0713593888  |
| C    | 6.0    | -1.2590629696 | -0.0651749865 | -0.0053830155 |
| C    | 6.0    | -0.0411332194 | -0.7465759691 | -0.1079338505 |
| H    | 1.0    | -0.1106002572 | 3.1377380878  | 0.1108245600  |
| H    | 1.0    | 2.0562217720  | 1.9548096780  | -0.0739898616 |
| H    | 1.0    | -2.2447295104 | 1.8539877941  | 0.1460385932  |
| H    | 1.0    | -0.0283683119 | -1.8288266984 | -0.1715689126 |
| C    | 6.0    | -2.4867984018 | -0.8107000874 | 0.0205591816  |
| C    | 6.0    | 2.4124345303  | -0.7003679125 | -0.2988903953 |
| N    | 7.0    | 3.3383288723  | -1.1862099809 | 0.3617374011  |
| N    | 7.0    | -3.4838374863 | -1.4102963135 | 0.0405183280  |
| H    | 1.0    | 4.1157019876  | -1.6082169783 | -0.1538685428 |

E[UB3LYP/6-31+G(d,p)] = -417.3020565 hartree  
 E[UB3LYP/6-311+(2df,p)] = -417.4191066 hartree  
 E[ROMP2/6-311+G(2df,p)] = -416.4088129 hartree  
 ZPE[UB3LYP/6-31+G(d,p)] = 279.983 kJ/mol  
 Enthalpy Correction[UB3LYP/6-31+G(d,p)] = 305.064 kJ/mol

**6. Energies and geometries of N-phenethylacetamide, N-(4-cyanophenethyl)acetamide, N-(perfluorophenethyl)acetamide, N-(3,5-dicyanophenethyl)acetamide, N-(3-nitrophenethyl)acetamide, N-(3,5-dinitrophenethyl)acetamide and their methyl ammonium complexes optimized at the (U)B3LYP/6-31++G(d,p) level of theory**

Table S5. B3LYP/6-31++G(d,p) optimized geometry of N-phenethylacetamide (**A1**) and electronic energy of N-phenethylacetamide (**A1**) neutral and anion formed by vertical electron attachment.

| ATOM<br>CHARGE | ATOMIC<br>X | COORDINATES (BOHR) |               |               |
|----------------|-------------|--------------------|---------------|---------------|
|                |             | Y                  | Z             |               |
| C              | 6.0         | 4.1717212960       | -3.9922540189 | -1.4798444210 |
| C              | 6.0         | 4.1742346315       | -1.4584149283 | -0.1260636206 |
| O              | 8.0         | 5.5493882328       | -1.0550907107 | 1.7024919369  |
| N              | 7.0         | 2.5848427950       | 0.3363712258  | -1.0937922990 |
| C              | 6.0         | 2.2814850822       | 2.8208884682  | 0.0503611976  |
| C              | 6.0         | 0.0599232111       | 2.9761861498  | 1.9392179113  |
| C              | 6.0         | -2.4878998519      | 2.4416771542  | 0.7531313951  |
| C              | 6.0         | -3.6417098482      | 0.0685214643  | 1.0038035474  |
| C              | 6.0         | -5.9621988748      | -0.4456351824 | -0.1511969763 |
| C              | 6.0         | -3.7307159422      | 4.2940054646  | -0.6850256705 |
| C              | 6.0         | -6.0478412566      | 3.7899777492  | -1.8426718106 |
| C              | 6.0         | -7.1721526302      | 1.4132693744  | -1.5814171928 |
| H              | 1.0         | -6.8267485142      | -2.2939005820 | 0.0770441285  |
| H              | 1.0         | 6.0772642902       | -4.3614875797 | -2.1901735225 |
| H              | 1.0         | 2.8355716391       | -4.0943370168 | -3.0538727852 |
| H              | 1.0         | 3.7226468123       | -5.4749708234 | -0.1121363401 |
| H              | 1.0         | 1.3724323958       | -0.1727209553 | -2.4757867083 |
| H              | 1.0         | 4.0463001822       | 3.2519349660  | 1.0303164030  |
| H              | 1.0         | 2.0208918685       | 4.2055284939  | -1.4667297226 |
| H              | 1.0         | 0.0696741972       | 4.8803118496  | 2.7598125242  |
| H              | 1.0         | 0.4235064911       | 1.6477087805  | 3.4832374269  |
| H              | 1.0         | -2.7212621141      | -1.3830715532 | 2.1290030923  |
| H              | 1.0         | -2.8824557409      | 6.1557824050  | -0.8870562759 |
| H              | 1.0         | -6.9816871479      | 5.2543642116  | -2.9376168424 |
| H              | 1.0         | -8.9781448594      | 1.0202063690  | -2.4740103659 |

E[B3LYP/6-31++G(d,p)] = -518.6105774 hartree  
E[B3LYP/6-311++G(2df,p)] = -518.7518539 hartree  
E[M06/6-31++G(d,p)] = -518.5539733 hartree  
E[M06/6-311++G(2df,p)] = -518.6945007 hartree  
E[MP2/6-311++G(2df,p)] = -517.7913924 hartree

E[UB3LYP/6-31++G(d,p)] = -518.595006 hartree  
E[UB3LYP/6-311++G(2df,p)] = -518.7373883 hartree  
E[UM06/6-31++G(d,p)] = -518.5317336 hartree  
E[UM06/6-311++G(2df,p)] = -518.6754261 hartree  
E[ROMP2/6-311++G(2df,p)] = -517.7697563 hartree

Table S6. B3LYP/6-31++G(d,p) optimized geometry of N-(4-cyanophenethyl)acetamide (**A2**) and electronic energy of N-(4-cyanophenethyl)acetamide (**A2**) neutral and anion formed by vertical electron attachment.

| ATOM | ATOMIC CHARGE | COORDINATES (BOHR) |               |               |
|------|---------------|--------------------|---------------|---------------|
|      |               | X                  | Y             | Z             |
| C    | 6.0           | 4.6869739838       | -3.8386948852 | -1.1660932152 |
| C    | 6.0           | 4.4794631731       | -1.3867754161 | 0.3130898016  |
| O    | 8.0           | 5.3589038532       | -1.1622381742 | 2.4515226266  |
| N    | 7.0           | 3.2781832599       | 0.5643855635  | -0.8839571253 |
| C    | 6.0           | 2.9517519928       | 3.0304401830  | 0.2955531445  |
| C    | 6.0           | 0.7195131698       | 3.1674453171  | 2.1786839885  |
| C    | 6.0           | -1.8170660235      | 2.6138500890  | 0.9903486984  |
| C    | 6.0           | -2.9166408840      | 0.2081344203  | 1.1881085230  |
| C    | 6.0           | -5.2231837328      | -0.3373160888 | 0.0413849991  |
| C    | 6.0           | -3.1082779964      | 4.4759104882  | -0.3936677178 |
| C    | 6.0           | -5.4136492151      | 3.9635490812  | -1.5522209263 |
| C    | 6.0           | -6.4866356309      | 1.5418463306  | -1.3439920197 |
| C    | 6.0           | -8.8608684646      | 0.9960556709  | -2.5320816455 |
| H    | 1.0           | -6.0572709893      | -2.2021543853 | 0.2171484132  |
| H    | 1.0           | 6.6888174144       | -4.2668501022 | -1.4527079558 |
| H    | 1.0           | 3.7430180584       | -3.7852156397 | -3.0041729917 |
| H    | 1.0           | 3.8829711651       | -5.3697319832 | -0.0353756705 |
| H    | 1.0           | 2.4918682764       | 0.2522028303  | -2.5920615483 |
| H    | 1.0           | 4.6944572987       | 3.4821980776  | 1.3099013629  |
| H    | 1.0           | 2.6998137241       | 4.4204848250  | -1.2150938101 |
| H    | 1.0           | 0.7132959713       | 5.0727048524  | 2.9959526837  |
| H    | 1.0           | 1.0952095934       | 1.8417269476  | 3.7188673603  |
| H    | 1.0           | -1.9600237945      | -1.2496380012 | 2.2710348975  |
| H    | 1.0           | -2.3052956297      | 6.3601751678  | -0.5527070569 |
| H    | 1.0           | -6.3971193109      | 5.4216049615  | -2.6061400069 |
| N    | 7.0           | -10.7834567873     | 0.5447135160  | -3.5013787964 |

E[B3LYP/6-31++G(d,p)] = -610.8102408 hartree  
E[B3LYP/6-311++G(2df,p)] = -610.9805241 hartree  
E[M06/6-31++G(d,p)] = -610.744172 hartree  
E[M06/6-311++G(2df,p)] = -610.9126094 hartree  
E[MP2/6-311++G(2df,p)] = -609.8814478 hartree

E[UB3LYP/6-31++G(d,p)] = -610.8129436 hartree  
E[UB3LYP/6-311++G(2df,p)] = -610.9855354 hartree  
E[UM06/6-31++G(d,p)] = -610.7504557 hartree  
E[UM06/6-311++G(2df,p)] = -610.9227138 hartree  
E[ROMP2/6-311++G(2df,p)] = -609.8671179 hartree

Table S7. B3LYP/6-31++G(d,p) optimized geometry of N-(perfluorophenethyl)acetamide (**A3**) and electronic energy of N-(perfluorophenethyl)acetamide (**A3**) neutral and anion formed by vertical electron attachment.

| ATOM<br>CHARGE | ATOMIC<br>X | COORDINATES (BOHR) |               |               |
|----------------|-------------|--------------------|---------------|---------------|
|                |             | Y                  | Z             |               |
| C              | 6.0         | 4.2723869993       | -4.0666903256 | -1.3418755266 |
| C              | 6.0         | 4.0577708189       | -1.5297331871 | -0.0207302941 |
| O              | 8.0         | 5.0004228334       | -1.1411488322 | 2.0644500525  |
| N              | 7.0         | 2.7451104561       | 0.3102930072  | -1.2845601374 |
| C              | 6.0         | 2.3703777927       | 2.8148413450  | -0.2097028929 |
| C              | 6.0         | 0.2064336669       | 2.9435694793  | 1.7494705249  |
| C              | 6.0         | -2.3768784501      | 2.4094195316  | 0.6516342123  |
| C              | 6.0         | -3.5679349456      | 0.0657624644  | 0.8986591935  |
| C              | 6.0         | -5.9512573614      | -0.4266434362 | -0.1107568401 |
| C              | 6.0         | -3.7116297097      | 4.2533952532  | -0.6894287321 |
| C              | 6.0         | -6.0937238036      | 3.8261093101  | -1.7204443337 |
| C              | 6.0         | -7.2198871087      | 1.4634793939  | -1.4305603672 |
| F              | 9.0         | -2.6735276356      | 6.5654749991  | -1.0002319653 |
| F              | 9.0         | -7.3058885384      | 5.6594080798  | -2.9834615949 |
| F              | 9.0         | -9.5078539511      | 1.0151041088  | -2.4148052507 |
| F              | 9.0         | -7.0267004210      | -2.7041222994 | 0.1765193045  |
| F              | 9.0         | -2.4190382369      | -1.8127952428 | 2.1790241392  |
| H              | 1.0         | 6.2686557383       | -4.5861193078 | -1.4552023941 |
| H              | 1.0         | 3.4558364000       | -4.0889890922 | -3.2407099936 |
| H              | 1.0         | 3.3218359303       | -5.4931877819 | -0.1865537495 |
| H              | 1.0         | 1.9810942392       | -0.0968484569 | -2.9825167319 |
| H              | 1.0         | 4.1219270162       | 3.3672082512  | 0.7371254160  |
| H              | 1.0         | 2.0236319712       | 4.1374794611  | -1.7592215110 |
| H              | 1.0         | 0.2062068998       | 4.8402118641  | 2.5766035897  |
| H              | 1.0         | 0.6108539255       | 1.6003333500  | 3.2621205890  |

E[B3LYP/6-31++G(d,p)] = -1014.62137 hartree  
E[B3LYP/6-311++G(2df,p)] = -1014.937722 hartree  
E[M06/6-31++G(d,p)] = -1014.608053 hartree  
E[M06/6-311++G(2df,p)] = -1014.906433 hartree  
E[MP2/6-311++G(2df,p)] = -1013.425995 hartree

E[UB3LYP/6-31++G(d,p)] = -1014.620447 hartree  
E[UB3LYP/6-311++G(2df,p)] = -1014.936681 hartree  
E[UM06/6-31++G(d,p)] = -1014.600937 hartree  
E[UM06/6-311++G(2df,p)] = -1014.90127 hartree  
E[ROMP2/6-311++G(2df,p)] = -1013.410628 hartree

Table S8. B3LYP/6-31++G(d,p) optimized geometry of N-(3,5-dicyanophenethyl)acetamide (**A4**) and electronic energy of N-(3,5-dicyanophenethyl)acetamide (**A4**) neutral and anion formed by vertical electron attachment.

| ATOM<br>CHARGE | ATOMIC<br>X | COORDINATES (BOHR) |               |               |
|----------------|-------------|--------------------|---------------|---------------|
|                |             | Y                  | Z             |               |
| C              | 6.0         | 4.7098396682       | -4.0539157779 | -0.8678944544 |
| C              | 6.0         | 4.4130015101       | -1.5213428037 | 0.4468257098  |
| O              | 8.0         | 5.1434750906       | -1.1652050440 | 2.6227506984  |
| N              | 7.0         | 3.2908633213       | 0.3599739034  | -0.9319939599 |
| C              | 6.0         | 2.9954235604       | 2.9116331101  | 0.0616995535  |
| C              | 6.0         | 0.7994296818       | 3.2033501108  | 1.9686409450  |
| C              | 6.0         | -1.7767203737      | 2.6549138347  | 0.8624709408  |
| C              | 6.0         | -2.8828336860      | 0.2657899602  | 1.1195114696  |
| C              | 6.0         | -5.2550256157      | -0.2622561726 | 0.0462793894  |
| C              | 6.0         | -3.0973175857      | 4.5126845559  | -0.4832596268 |
| C              | 6.0         | -5.4697740769      | 3.9965247997  | -1.5572287002 |
| C              | 6.0         | -6.5662119923      | 1.6002766582  | -1.3006228083 |
| C              | 6.0         | -6.7832470220      | 5.9396922383  | -2.9205337195 |
| C              | 6.0         | -6.3451518462      | -2.7297658810 | 0.3356909245  |
| H              | 1.0         | 6.7267253177       | -4.4772899882 | -1.0318470811 |
| H              | 1.0         | 3.8557591108       | -4.1209443587 | -2.7487198327 |
| H              | 1.0         | 3.8638660353       | -5.5226675073 | 0.3131842879  |
| H              | 1.0         | 2.7109064157       | -0.0152122942 | -2.7084497719 |
| H              | 1.0         | 4.7503553934       | 3.4411343319  | 1.0183922320  |
| H              | 1.0         | 2.7266667304       | 4.1844958437  | -1.5459281388 |
| H              | 1.0         | 0.8489971945       | 5.1466498303  | 2.6847526080  |
| H              | 1.0         | 1.1740867562       | 1.9524648905  | 3.5697868771  |
| H              | 1.0         | -1.9118735763      | -1.1999571049 | 2.1747911530  |
| H              | 1.0         | -2.2982658490      | 6.3911477768  | -0.6954380607 |
| H              | 1.0         | -8.3988115634      | 1.1989177557  | -2.1220866952 |
| N              | 7.0         | -7.8344071026      | 7.5207503832  | -4.0287257305 |
| N              | 7.0         | -7.2176383348      | -4.7342171335 | 0.5671445634  |

E[B3LYP/6-31++G(d,p)] = -703.0052326 hartree  
E[B3LYP/6-311++G(2df,p)] = -703.2044955 hartree  
E[M06/6-31++G(d,p)] = -702.9293438 hartree  
E[M06/6-311++G(2df,p)] = -703.1258404 hartree  
E[MP2/6-311++G(2df,p)] = -701.9673638 hartree

E[UB3LYP/6-31++G(d,p)] = -703.0346715 hartree  
E[UB3LYP/6-311++G(2df,p)] = -703.2366543 hartree  
E[UM06/6-31++G(d,p)] = -702.9641359 hartree  
E[UM06/6-311++G(2df,p)] = -703.1640454 hartree  
E[ROMP2/6-311++G(2df,p)] = -701.9577306 hartree



Table S9. B3LYP/6-31++G(d,p) optimized geometry of N-(3-nitrophenethyl)acetamide (**A5**) and electronic energy of N-(3-nitrophenethyl)acetamide (**A5**) neutral and anion formed by vertical electron attachment.

| ATOM | ATOMIC CHARGE | COORDINATES (BOHR) |               |               |
|------|---------------|--------------------|---------------|---------------|
|      |               | X                  | Y             | Z             |
| C    | 6.0           | -5.0640429382      | -4.8476304294 | 1.2094350640  |
| C    | 6.0           | -5.1340828463      | -1.9829747823 | 1.0431260640  |
| O    | 8.0           | -5.3023227589      | -0.6534312236 | 2.9373886296  |
| H    | 1.0           | -3.4583415794      | -5.4014916809 | 2.3865728769  |
| H    | 1.0           | -4.9085286121      | -5.7878549880 | -0.6250528771 |
| H    | 1.0           | -6.7820583769      | -5.4960952950 | 2.1579120197  |
| N    | 7.0           | -5.0065113020      | -0.9922072243 | -1.3488528912 |
| C    | 6.0           | -5.0535287034      | 1.7081790816  | -1.8581859312 |
| C    | 6.0           | -2.5484259026      | 2.7336390104  | -2.9504700962 |
| O    | 8.0           | 7.1895329438       | -1.9092427946 | 1.0237552988  |
| O    | 8.0           | 5.0808844895       | -3.0800710898 | -2.3128093813 |
| H    | 1.0           | -4.8902655619      | -2.1975679258 | -2.8231738555 |
| H    | 1.0           | -6.5881451333      | 2.1342834292  | -3.1854585919 |
| H    | 1.0           | -5.4923658791      | 2.6267609158  | -0.0626231337 |
| H    | 1.0           | -2.8355349924      | 4.7417116697  | -3.3815030254 |
| H    | 1.0           | -2.1515893612      | 1.7964267163  | -4.7553558824 |
| C    | 6.0           | -0.3062707633      | 2.4275253804  | -1.2017824578 |
| C    | 6.0           | 1.5032001593       | 0.5550837078  | -1.6385214359 |
| C    | 6.0           | 3.5219580943       | 0.2808438064  | 0.0358033605  |
| C    | 6.0           | -0.0197126335      | 3.9873700654  | 0.9263366450  |
| C    | 6.0           | 2.0138160109       | 3.6909186682  | 2.5793149855  |
| C    | 6.0           | 3.8194253116       | 1.8200814481  | 2.1497563970  |
| N    | 7.0           | 5.4012286070       | -1.7130733484 | -0.4532326479 |
| H    | 1.0           | 1.3765020377       | -0.6899255882 | -3.2589704974 |
| H    | 1.0           | -1.4150528999      | 5.4468503152  | 1.3017916485  |
| H    | 1.0           | 2.1922532032       | 4.9162569298  | 4.2138376733  |
| H    | 1.0           | 5.4149328195       | 1.5432224913  | 3.4002830947  |

E[B3LYP/6-31++G(d,p)] = -723.035315 hartree  
E[B3LYP/6-311++G(2df,p)] = -723.246068 hartree  
E[M06/6-31++G(d,p)] = -722.9761272 hartree  
E[M06/6-311++G(2df,p)] = -723.1808133 hartree  
E[MP2/6-311++G(2df,p)] = -722.016958 hartree

E[UB3LYP/6-31++G(d,p)] = -723.0653981 hartree  
E[UB3LYP/6-311++G(2df,p)] = -723.277387 hartree  
E[UM06/6-31++G(d,p)] = -723.0114837 hartree  
E[UM06/6-311++G(2df,p)] = -723.2182506 hartree  
E[ROMP2/6-311++G(2df,p)] = -722.002523 hartree

Table S10. B3LYP/6-31++G(d,p) optimized geometry of N-(3,5-dinitrophenethyl)acetamide (**A6**) and electronic energy of N-(3,5-dinitrophenethyl)acetamide (**A6**) neutral and anion formed by vertical electron attachment.

| ATOM | ATOMIC CHARGE | COORDINATES (BOHR) |               |               |
|------|---------------|--------------------|---------------|---------------|
|      |               | X                  | Y             | Z             |
| C    | 6.0           | -5.0072825387      | -4.7598607151 | 0.9187469807  |
| C    | 6.0           | -4.9509498070      | -1.8914267411 | 0.9061803029  |
| O    | 8.0           | -4.6273909234      | -0.6597222396 | 2.8449257827  |
| H    | 1.0           | -3.2442248839      | -5.4549775225 | 1.7413824977  |
| H    | 1.0           | -5.2535894239      | -5.5984077249 | -0.9544061101 |
| H    | 1.0           | -6.5506028556      | -5.3829033733 | 2.1441775920  |
| N    | 7.0           | -5.2952011902      | -0.7642240867 | -1.4058616486 |
| C    | 6.0           | -5.3682202024      | 1.9638977327  | -1.7390959292 |
| C    | 6.0           | -2.8912240694      | 3.0960136747  | -2.8038242425 |
| O    | 8.0           | 6.5513398488       | -1.9288811102 | 1.4146866689  |
| O    | 8.0           | 4.3080650260       | -3.1869472893 | -1.8055953867 |
| H    | 1.0           | -5.5650729585      | -1.8784254263 | -2.9307193426 |
| H    | 1.0           | -6.9209135602      | 2.4379732913  | -3.0239962173 |
| H    | 1.0           | -5.7887031319      | 2.7836419690  | 0.1088293196  |
| H    | 1.0           | -3.2201497749      | 5.1120489475  | -3.1495685092 |
| H    | 1.0           | -2.4810212493      | 2.2321632340  | -4.6411859231 |
| C    | 6.0           | -0.6458516508      | 2.7714910309  | -1.0671471625 |
| C    | 6.0           | 1.0288802113       | 0.7502968062  | -1.3766086903 |
| C    | 6.0           | 3.0350700116       | 0.4373392853  | 0.3046994183  |
| C    | 6.0           | -0.2356677279      | 4.4557660092  | 0.9344883982  |
| C    | 6.0           | 1.7980553801       | 4.0865135512  | 2.5625251311  |
| C    | 6.0           | 3.4754517558       | 2.0801347782  | 2.3040484105  |
| N    | 7.0           | 4.7646417219       | -1.7221639844 | -0.0548398482 |
| H    | 1.0           | 0.8016406613       | -0.5887441315 | -2.9082127061 |
| H    | 1.0           | -1.4803168525      | 6.0514128387  | 1.2516600080  |
| N    | 7.0           | 2.2048566934       | 5.8993465885  | 4.6474976079  |
| H    | 1.0           | 5.0429038736       | 1.8186722906  | 3.5889486986  |
| O    | 8.0           | 3.9900808340       | 5.5055087954  | 6.0811004340  |
| O    | 8.0           | 0.7341963407       | 7.6928477289  | 4.8127919400  |

E[B3LYP/6-31++G(d,p)] = -927.4559891 hartree

E[B3LYP/6-311++G(2df,p)] = -927.7365305 hartree

E[M06/6-31++G(d,p)] = -927.394532 hartree

E[M06/6-311++G(2df,p)] = -927.6636976 hartree

E[MP2/6-311++G(2df,p)] = -926.2398478 hartree

E[UB3LYP/6-31++G(d,p)] = -927.5141941 hartree

E[UB3LYP/6-311++G(2df,p)] = -927.7954118 hartree

E[UM06/6-31++G(d,p)] = -927.4579133 hartree

E[UM06/6-311++G(2df,p)] = -927.728107 hartree

E[ROMP2/6-311++G(2df,p)] is not available due to failure of SCF convergence.

Table S11. B3LYP/6-31++G(d,p) optimized geometry of N-phenethylacetamide with the methyl ammonium ion complex (**B1**) and electronic energy of the complex and the charge-neutralized radical formed by vertical electron attachment.

| ATOM | ATOMIC CHARGE | COORDINATES (BOHR) |               |               |
|------|---------------|--------------------|---------------|---------------|
|      |               | X                  | Y             | Z             |
| C    | 6.0           | 4.0815435718       | -3.9344095064 | -1.6651320541 |
| C    | 6.0           | 4.3449335800       | -1.3116399108 | -0.5695823100 |
| O    | 8.0           | 6.4822514666       | -0.3951417040 | -0.0484147798 |
| N    | 7.0           | 2.2391363229       | 0.0081636163  | -0.1688659143 |
| C    | 6.0           | 2.1414374893       | 2.5822349732  | 0.8556490300  |
| C    | 6.0           | -0.2574562686      | 2.9652635336  | 2.4564170169  |
| C    | 6.0           | -2.6724504918      | 2.4142761274  | 1.0151985951  |
| C    | 6.0           | -4.0013624982      | 0.1537481064  | 1.4105292718  |
| C    | 6.0           | -6.1905533632      | -0.3904740808 | 0.0308970199  |
| C    | 6.0           | -3.5937486026      | 4.1264623586  | -0.7912471683 |
| C    | 6.0           | -5.7775159540      | 3.5883061918  | -2.1687818243 |
| C    | 6.0           | -7.0793292897      | 1.3237719517  | -1.7654387095 |
| H    | 1.0           | -7.2081897048      | -2.1379414962 | 0.3803451495  |
| N    | 7.0           | 11.2405059147      | -1.2892844524 | 0.0713938478  |
| C    | 6.0           | 12.4051818354      | 1.2692155624  | -0.2996160554 |
| H    | 1.0           | 5.0851392494       | -4.0227164018 | -3.4713321531 |
| H    | 1.0           | 2.1177403254       | -4.4842819743 | -1.9786564927 |
| H    | 1.0           | 4.9512143687       | -5.3035726763 | -0.3824049509 |
| H    | 1.0           | 0.5612108238       | -0.7691940660 | -0.6740085680 |
| H    | 1.0           | 3.8424743371       | 2.8747078643  | 1.9846658213  |
| H    | 1.0           | 2.1794020844       | 3.9295340134  | -0.7185683068 |
| H    | 1.0           | -0.2455320976      | 4.9279518417  | 3.1144385031  |
| H    | 1.0           | -0.1476820859      | 1.7643804630  | 4.1390479336  |
| H    | 1.0           | -3.3550762104      | -1.1662065988 | 2.8485918512  |
| H    | 1.0           | -2.6134721438      | 5.9061873965  | -1.1032031344 |
| H    | 1.0           | -6.4747681517      | 4.9425594236  | -3.5438031448 |
| H    | 1.0           | -8.7848825827      | 0.9124919877  | -2.8286552420 |
| H    | 1.0           | 11.6793947753      | -2.0033930059 | 1.8123039140  |
| H    | 1.0           | 11.8922346133      | -2.5468782000 | -1.2416444602 |
| H    | 1.0           | 11.8751892849      | 1.9573781781  | -2.1663629751 |
| H    | 1.0           | 14.4554211486      | 1.1408653733  | -0.1397452368 |
| H    | 1.0           | 11.6518425704      | 2.5346516728  | 1.1387866747  |
| H    | 1.0           | 9.1761881430       | -1.1620303044 | -0.0697686835 |

E[B3LYP/6-31++G(d,p)] = -614.8260779 hartree  
E[B3LYP/6-311++G(2df,p)] = -614.9919194 hartree  
E[M06/6-31++G(d,p)] = -614.7529275 hartree  
E[M06/6-311++G(2df,p)] = -614.9169829 hartree  
E[MP2/6-311++G(2df,p)] = -613.8405171 hartree

E[UB3LYP/6-31++G(d,p)] = -614.9344925 hartree  
E[UB3LYP/6-311++G(2df,p)] = -615.1001801 hartree  
E[UM06/6-31++G(d,p)] = -614.8520682 hartree  
E[UM06/6-311++G(2df,p)] = -615.0176261 hartree  
E[ROMP2/6-311++G(2df,p)] = -613.9412151 hartree

Table S12. B3LYP/6-31++G(d,p) optimized geometry of N-(4-cyanophenethyl)acetamide with the methyl ammonium ion complex (**B2**) and electronic energy of the complex and the charge-neutralized radical formed by vertical electron attachment.

| ATOM | ATOMIC<br>CHARGE | COORDINATES (BOHR) |               |               |
|------|------------------|--------------------|---------------|---------------|
|      |                  | X                  | Y             | Z             |
| C    | 6.0              | 4.4973021864       | -3.7974610641 | -1.5920374529 |
| C    | 6.0              | 4.8094282278       | -1.1696647974 | -0.5210163521 |
| O    | 8.0              | 6.9567427649       | -0.2992003156 | 0.0206736023  |
| N    | 7.0              | 2.7227927921       | 0.2021817834  | -0.1651998458 |
| C    | 6.0              | 2.6646648208       | 2.7951881947  | 0.8112215720  |
| C    | 6.0              | 0.3735610333       | 3.2119483641  | 2.5577252271  |
| C    | 6.0              | -2.1302125169      | 2.6336733146  | 1.2915899181  |
| C    | 6.0              | -3.4485042632      | 0.4021147929  | 1.8537833994  |
| C    | 6.0              | -5.7106574486      | -0.1874986125 | 0.6352124935  |
| C    | 6.0              | -3.1502488106      | 4.2871835538  | -0.5179549960 |
| C    | 6.0              | -5.4057123660      | 3.7249522780  | -1.7487524290 |
| C    | 6.0              | -6.6949212293      | 1.4701690239  | -1.1857274683 |
| N    | 7.0              | 11.7181530553      | -1.3224491435 | 0.0929745186  |
| C    | 6.0              | 12.9422797557      | 1.2291722687  | 0.2894115350  |
| C    | 6.0              | -9.0089473930      | 0.8693684407  | -2.4661869003 |
| N    | 7.0              | -10.8735778197     | 0.3723705059  | -3.5192178097 |
| H    | 1.0              | -6.7219254137      | -1.9103806928 | 1.0951717989  |
| H    | 1.0              | 5.5165825897       | -3.9260002258 | -3.3871826549 |
| H    | 1.0              | 2.5260156250       | -4.3093689369 | -1.9227961925 |
| H    | 1.0              | 5.3239439225       | -5.1721989257 | -0.2871627611 |
| H    | 1.0              | 1.0434122041       | -0.5599258102 | -0.6816052665 |
| H    | 1.0              | 4.4290074892       | 3.1186525921  | 1.8277051808  |
| H    | 1.0              | 2.5995070687       | 4.1104374822  | -0.7888661136 |
| H    | 1.0              | 0.4230718541       | 5.1894521239  | 3.1704688786  |
| H    | 1.0              | 0.5915598232       | 2.0464976557  | 4.2537354038  |
| H    | 1.0              | -2.7236998606      | -0.8730534063 | 3.2920538487  |
| H    | 1.0              | -2.1839752213      | 6.0457814553  | -0.9575808498 |
| H    | 1.0              | -6.1845251373      | 5.0193011960  | -3.1345640849 |
| H    | 1.0              | 12.1318140741      | -2.4093250453 | 1.6362570410  |
| H    | 1.0              | 12.3506254462      | -2.2772143015 | -1.4630825515 |
| H    | 1.0              | 12.4403307388      | 2.3178623075  | -1.3846778202 |
| H    | 1.0              | 14.9874735004      | 1.0181654649  | 0.4201805734  |
| H    | 1.0              | 12.2101054217      | 2.1680259339  | 1.9690188902  |
| H    | 1.0              | 9.6677058724       | -1.1252184421 | -0.0287427323 |

E[B3LYP/6-31++G(d,p)] = -707.0192877 hartree  
E[B3LYP/6-311++G(2df,p)] = -707.2141321 hartree  
E[M06/6-31++G(d,p)] = -706.9364181 hartree  
E[M06/6-311++G(2df,p)] = -707.1284837 hartree  
E[MP2/6-311++G(2df,p)] = -705.9236485 hartree

E[UB3LYP/6-31++G(d,p)] = -707.1363112 hartree  
E[UB3LYP/6-311++G(2df,p)] = -707.3315977 hartree  
E[UM06/6-31++G(d,p)] = -707.0455363 hartree  
E[UM06/6-311++G(2df,p)] = -707.2399301 hartree  
E[ROMP2/6-311++G(2df,p)] = -706.0291795 hartree

Table S13. B3LYP/6-31++G(d,p) optimized geometry of N-(perfluorophenethyl)acetamide with the methyl ammonium ion complex (**B3**) and electronic energy of the complex and the charge-neutralized radical formed by vertical electron attachment.

| ATOM | ATOMIC<br>CHARGE | COORDINATES (BOHR) |               |               |
|------|------------------|--------------------|---------------|---------------|
|      |                  | X                  | Y             | Z             |
| C    | 6.0              | 3.5929171232       | -4.9150450132 | 0.4898169760  |
| C    | 6.0              | 3.6600779848       | -2.1774367694 | 1.2917977879  |
| O    | 8.0              | 5.5022773639       | -0.7688539154 | 0.7677578743  |
| N    | 7.0              | 1.6833679099       | -1.2817633430 | 2.5833499115  |
| C    | 6.0              | 1.4721343390       | 1.3335607323  | 3.4834452967  |
| C    | 6.0              | -1.3041188014      | 2.1259039417  | 3.8084781666  |
| C    | 6.0              | -2.8178460093      | 2.1122601200  | 1.3815786696  |
| C    | 6.0              | -4.1180530779      | -0.0305757665 | 0.5618533307  |
| C    | 6.0              | -5.5447773014      | -0.0801621764 | -1.6465371504 |
| C    | 6.0              | -2.9984660192      | 4.2484252738  | -0.1593227980 |
| C    | 6.0              | -4.4085606540      | 4.2726704582  | -2.3826421144 |
| C    | 6.0              | -5.6916845997      | 2.0945344903  | -3.1281390165 |
| N    | 7.0              | 9.9053200181       | -0.4800659899 | -1.3239798215 |
| C    | 6.0              | 10.1670659646      | 2.2717718907  | -1.9644268560 |
| F    | 9.0              | -1.7712779628      | 6.3782787428  | 0.5122102290  |
| F    | 9.0              | -4.5323943980      | 6.3581720583  | -3.8010704407 |
| F    | 9.0              | -7.0408922631      | 2.0847646069  | -5.2559893760 |
| F    | 9.0              | -6.7487217282      | -2.1854870021 | -2.3561292588 |
| F    | 9.0              | -3.9880210327      | -2.1784950159 | 1.9619135205  |
| H    | 1.0              | 3.7820597973       | -5.0267278191 | -1.5662993849 |
| H    | 1.0              | 1.8544637008       | -5.8791832122 | 1.0422972658  |
| H    | 1.0              | 5.1960472676       | -5.9124990813 | 1.3337686021  |
| H    | 1.0              | 0.2437935497       | -2.4804921260 | 2.9748066499  |
| H    | 1.0              | 2.4527698458       | 1.5178090161  | 5.2992641011  |
| H    | 1.0              | 2.4366693803       | 2.5477474739  | 2.1219544144  |
| H    | 1.0              | -1.3126792601      | 4.0327130523  | 4.6007646842  |
| H    | 1.0              | -2.2252090423      | 0.9011347345  | 5.1986550895  |
| H    | 1.0              | 11.2389941339      | -1.0209055676 | -0.0339772733 |
| H    | 1.0              | 10.1463734651      | -1.5841572955 | -2.8910539941 |
| H    | 1.0              | 8.7059298309       | 2.7604172366  | -3.3303585945 |
| H    | 1.0              | 12.0350223090      | 2.6316891023  | -2.7551637983 |
| H    | 1.0              | 9.8953233676       | 3.3636177718  | -0.2403542484 |
| H    | 1.0              | 8.0514610296       | -0.8541939410 | -0.5192022151 |

E[B3LYP/6-31++G(d,p)] = -1110.830942 hartree  
E[B3LYP/6-311++G(2df,p)] = -1111.172204 hartree  
E[M06/6-31++G(d,p)] = -1110.800526 hartree  
E[M06/6-311++G(2df,p)] = -1111.122906 hartree  
E[MP2/6-311++G(2df,p)] = -1109.469031 hartree

E[UB3LYP/6-31++G(d,p)] = -1110.945597 hartree  
E[UB3LYP/6-311++G(2df,p)] = -1111.286553 hartree  
E[UM06/6-31++G(d,p)] = -1110.906748 hartree  
E[UM06/6-311++G(2df,p)] = -1111.230569 hartree  
E[ROMP2/6-311++G(2df,p)] = -1109.574072 hartree

Table S14. B3LYP/6-31++G(d,p) optimized geometry of N-(3,5-dicyanophenethyl)acetamide with the methyl ammonium ion complex (**B4**) and electronic energy of the complex and the charge-neutralized radical formed by vertical electron attachment.

| ATOM | ATOMIC CHARGE | COORDINATES (BOHR) |               |               |
|------|---------------|--------------------|---------------|---------------|
|      |               | X                  | Y             | Z             |
| C    | 6.0           | 4.6701932170       | -4.0142693267 | -1.3996822446 |
| C    | 6.0           | 4.8894770206       | -1.3809739573 | -0.3229730686 |
| O    | 8.0           | 7.0001497708       | -0.4284386759 | 0.2109879065  |
| N    | 7.0           | 2.7514221409       | -0.0857746626 | 0.0539516769  |
| C    | 6.0           | 2.6277773695       | 2.4953075777  | 1.0544859984  |
| C    | 6.0           | 0.2748984394       | 2.8814352888  | 2.7200337922  |
| C    | 6.0           | -2.1972033032      | 2.4681711126  | 1.3274947119  |
| C    | 6.0           | -3.6396311496      | 0.2933988569  | 1.7445194428  |
| C    | 6.0           | -5.8995355611      | -0.1192795043 | 0.4047037175  |
| C    | 6.0           | -3.0573309838      | 4.2424159452  | -0.4406085113 |
| C    | 6.0           | -5.3142118336      | 3.8428333851  | -1.7746794696 |
| C    | 6.0           | -6.7499878446      | 1.6531322941  | -1.3633239166 |
| N    | 7.0           | 11.8426859979      | -1.1431897363 | 0.2166381872  |
| C    | 6.0           | 12.9334736326      | 1.4192031140  | -0.3265257534 |
| C    | 6.0           | -6.1419307135      | 5.6841067985  | -3.5865676439 |
| C    | 6.0           | -7.3204961203      | -2.3846074294 | 0.8582001601  |
| H    | 1.0           | 5.6865823395       | -4.1018770235 | -3.1986635904 |
| H    | 1.0           | 2.7185220114       | -4.6021819787 | -1.7208978680 |
| H    | 1.0           | 5.5550007190       | -5.3572030999 | -0.1000420938 |
| H    | 1.0           | 1.1052629357       | -0.8967694675 | -0.4896469007 |
| H    | 1.0           | 4.3456705731       | 2.8178082148  | 2.1482782974  |
| H    | 1.0           | 2.6235443833       | 3.8357847071  | -0.5263264821 |
| H    | 1.0           | 0.3526795611       | 4.8167414674  | 3.4504128865  |
| H    | 1.0           | 0.3818191358       | 1.6176999318  | 4.3546845661  |
| H    | 1.0           | -3.0485815524      | -1.0903907922 | 3.1394962697  |
| H    | 1.0           | -1.9951538006      | 5.9638996282  | -0.7857669630 |
| H    | 1.0           | -8.4928254313      | 1.3441998896  | -2.3928088402 |
| H    | 1.0           | 12.3498506585      | -1.7537035111 | 1.9790722324  |
| H    | 1.0           | 12.4851550392      | -2.4547729553 | -1.0480042383 |
| H    | 1.0           | 12.3274385083      | 1.9965144033  | -2.2078802550 |
| H    | 1.0           | 14.9898167606      | 1.3391921157  | -0.2310567965 |
| H    | 1.0           | 12.2024520315      | 2.7415010794  | 1.0719281693  |
| H    | 1.0           | 9.7934104451       | -1.0826618129 | 0.1353232780  |
| N    | 7.0           | -6.7820564946      | 7.1837744451  | -5.0591555171 |
| N    | 7.0           | -8.4298408641      | -4.2453261232 | 1.2269990838  |

E[B3LYP/6-31++G(d,p)] = -799.2096641 hartree  
E[B3LYP/6-311++G(2df,p)] = -799.4335119 hartree  
E[M06/6-31++G(d,p)] = -799.1168022 hartree  
E[M06/6-311++G(2df,p)] = -799.3370771 hartree  
E[MP2/6-311++G(2df,p)] = -798.0047667 hartree

E[UB3LYP/6-31++G(d,p)] = -799.3380498 hartree  
E[UB3LYP/6-311++G(2df,p)] = -799.5629747 hartree  
E[UM06/6-31++G(d,p)] = -799.2398239 hartree  
E[UM06/6-311++G(2df,p)] = -799.4629314 hartree  
E[ROMP2/6-311++G(2df,p)] = -798.1130718 hartree

Table S15. B3LYP/6-31++G(d,p) optimized geometry of N-(3-nitrophenethyl)acetamide with the methyl ammonium ion complex (**B5**) and electronic energy of the complex and the charge-neutralized radical formed by vertical electron attachment.

| ATOM | ATOMIC CHARGE | COORDINATES (BOHR) |               |               |
|------|---------------|--------------------|---------------|---------------|
|      |               | X                  | Y             | Z             |
| C    | 6.0           | 4.3758305999       | -3.4290589828 | -1.7661945999 |
| C    | 6.0           | 4.6392206081       | -0.8062893872 | -0.6706448558 |
| O    | 8.0           | 6.7765384947       | 0.1102088196  | -0.1494773256 |
| N    | 7.0           | 2.5334233509       | 0.5135141399  | -0.2699284601 |
| C    | 6.0           | 2.4357245174       | 3.0875854968  | 0.7545864842  |
| C    | 6.0           | 0.0368307595       | 3.4706140573  | 2.3553544711  |
| C    | 6.0           | -2.3781634638      | 2.9196266510  | 0.9141360493  |
| C    | 6.0           | -3.7070754701      | 0.6590986300  | 1.3094667259  |
| C    | 6.0           | -5.8962663351      | 0.1148764428  | -0.0701655259 |
| C    | 6.0           | -3.2994615746      | 4.6318128822  | -0.8923097141 |
| C    | 6.0           | -5.4832289260      | 4.0936567154  | -2.2698443702 |
| C    | 6.0           | -6.7850422617      | 1.8291224753  | -1.8665012553 |
| N    | 7.0           | 11.2405059147      | -1.2892844524 | 0.0713938478  |
| C    | 6.0           | 12.4051818354      | 1.2692155624  | -0.2996160554 |
| N    | 7.0           | -7.2276160880      | -2.2861716027 | 0.3662288964  |
| H    | 1.0           | 5.3794262775       | -3.5173658782 | -3.5723946990 |
| H    | 1.0           | 2.4120273535       | -3.9789314507 | -2.0797190385 |
| H    | 1.0           | 5.2455013967       | -4.7982221527 | -0.4834674967 |
| H    | 1.0           | 0.8554978519       | -0.2638435424 | -0.7750711139 |
| H    | 1.0           | 4.1367613652       | 3.3800583879  | 1.8836032755  |
| H    | 1.0           | 2.4736891124       | 4.4348845370  | -0.8196308527 |
| H    | 1.0           | 0.0487549305       | 5.4333023654  | 3.0133759573  |
| H    | 1.0           | 0.1466049421       | 2.2697309866  | 4.0379853878  |
| H    | 1.0           | -3.0607891823      | -0.6608560752 | 2.7475293053  |
| H    | 1.0           | -2.3191851157      | 6.4115379202  | -1.2042656802 |
| H    | 1.0           | -6.1804811237      | 5.4479099473  | -3.6448656906 |
| H    | 1.0           | -8.4905955546      | 1.4178425113  | -2.9297177878 |
| H    | 1.0           | 11.6793947753      | -2.0033930059 | 1.8123039140  |
| H    | 1.0           | 11.8922346133      | -2.5468782000 | -1.2416444602 |
| H    | 1.0           | 11.8751892849      | 1.9573781781  | -2.1663629751 |
| H    | 1.0           | 14.4554211486      | 1.1408653733  | -0.1397452368 |
| H    | 1.0           | 11.6518425704      | 2.5346516728  | 1.1387866747  |
| H    | 1.0           | 9.1761881430       | -1.1620303044 | -0.0697686835 |
| O    | 8.0           | -9.2198030188      | -2.6308954174 | -0.7727467509 |
| O    | 8.0           | -6.2435223826      | -3.8012594133 | 1.8355286464  |

E[B3LYP/6-31++G(d,p)] = -819.2464238 hartree  
E[B3LYP/6-311++G(2df,p)] = -819.4818931 hartree  
E[M06/6-31++G(d,p)] = -819.170015 hartree  
E[M06/6-311++G(2df,p)] = -819.3982571 hartree  
E[MP2/6-311++G(2df,p)] = -818.0618472 hartree

E[UB3LYP/6-31++G(d,p)] = -819.3758248 hartree  
E[UB3LYP/6-311++G(2df,p)] = -819.6116289 hartree  
E[UM06/6-31++G(d,p)] = -819.2950838 hartree  
E[UM06/6-311++G(2df,p)] = -819.525209 hartree  
E[ROMP2/6-311++G(2df,p)] = -818.1659839 hartree

Table S16. B3LYP/6-31++G(d,p) optimized geometry of N-(3,5-dicyanophenethyl)acetamide with the methyl ammonium ion complex (C4) and electronic energy of the complex and the charge-neutralized radical formed by vertical electron attachment.

| ATOM | ATOMIC CHARGE | COORDINATES (BOHR) |               |               |
|------|---------------|--------------------|---------------|---------------|
|      |               | X                  | Y             | Z             |
| C    | 6.0           | -3.4316479074      | -6.4293769335 | 3.3369915327  |
| C    | 6.0           | -4.0105465665      | -4.9855506898 | 0.9264381655  |
| O    | 8.0           | -2.9984093275      | -5.5214013909 | -1.1010299495 |
| N    | 7.0           | -5.7135109348      | -3.0564428125 | 1.1490100923  |
| C    | 6.0           | -6.8587415752      | -1.7285134637 | -0.9903486984 |
| C    | 6.0           | -4.9856451761      | -0.5173880782 | -2.8774668642 |
| C    | 6.0           | -2.9088552129      | 1.0422405740  | -1.6846907181 |
| C    | 6.0           | -0.4664977573      | 0.0507202455  | -1.4777846197 |
| C    | 6.0           | 1.4817341470       | 1.5029557698  | -0.3984109300 |
| C    | 6.0           | -3.3558698953      | 3.4903238993  | -0.7838772370 |
| C    | 6.0           | -1.4137984977      | 4.9364556087  | 0.3132220825  |
| C    | 6.0           | 1.0333399646       | 3.9531366910  | 0.5110574961  |
| C    | 6.0           | -1.9297881787      | 7.4401913643  | 1.2238054469  |
| C    | 6.0           | 3.9705032728       | 0.4632096341  | -0.2520894468 |
| N    | 7.0           | -2.3443940604      | 9.4650327602  | 1.9694724244  |
| N    | 7.0           | 5.9926423605       | -0.3899071630 | -0.1528410379 |
| H    | 1.0           | -1.3964319159      | -6.7500256391 | 3.4573670781  |
| H    | 1.0           | -4.3449146827      | -8.2828201823 | 3.2266882268  |
| H    | 1.0           | -4.0806365034      | -5.4775030562 | 5.0524469898  |
| H    | 1.0           | -6.5531539857      | -2.8205483175 | 2.8462296937  |
| H    | 1.0           | -8.0703204949      | -3.0236371694 | -2.0643366690 |
| H    | 1.0           | -8.0778793989      | -0.2707599395 | -0.1773507839 |
| H    | 1.0           | -6.1051377485      | 0.6778447118  | -4.1468336047 |
| H    | 1.0           | -4.1381030707      | -2.0121424372 | -4.0145716828 |
| H    | 1.0           | -0.0961114637      | -1.8554274610 | -2.1383950304 |
| H    | 1.0           | -5.2285694519      | 4.3150570121  | -0.9413103090 |
| H    | 1.0           | 2.5375051591       | 5.0693222429  | 1.3394188828  |
| N    | 7.0           | 10.6883657756      | -2.6541579443 | -0.2121217421 |
| C    | 6.0           | 12.7272667328      | -0.6969498415 | 0.0733024711  |
| H    | 1.0           | 10.8658677376      | -3.6177292254 | -1.8797482345 |
| H    | 1.0           | 8.8646668139       | -1.8048961881 | -0.1817916400 |
| H    | 1.0           | 12.4474928003      | 0.2733110696  | 1.8677484745  |
| H    | 1.0           | 12.5613676883      | 0.6430359591  | -1.4812995100 |
| H    | 1.0           | 14.5711290708      | -1.6133724593 | 0.0347898554  |
| H    | 1.0           | 10.7598541097      | -3.9590515333 | 1.2136198238  |

E[B3LYP/6-31++G(d,p)] = -799.2067168 hartree  
E[B3LYP/6-311++G(2df,p)] = -799.4311592 hartree  
E[M06/6-31++G(d,p)] = -799.1170901 hartree  
E[M06/6-311++G(2df,p)] = -799.3375442 hartree  
E[MP2/6-311++G(2df,p)] = -798.0028924 hartree

E[UB3LYP/6-31++G(d,p)] = -799.3378863 hartree  
E[UB3LYP/6-311++G(2df,p)] = -799.5639059 hartree  
E[UM06/6-31++G(d,p)] = -799.2481694 hartree  
E[UM06/6-311++G(2df,p)] = -799.4719508 hartree  
E[ROMP2/6-311++G(2df,p)] = -798.1101728 hartree



Table S17. B3LYP/6-31++G(d,p) optimized geometry of N-(3-nitrophenethyl)acetamide with the methyl ammonium ion complex (**C5**) and electronic energy of the complex and the charge-neutralized radical formed by vertical electron attachment.

| ATOM | ATOMIC<br>CHARGE | COORDINATES (BOHR) |               |               |
|------|------------------|--------------------|---------------|---------------|
|      |                  | X                  | Y             | Z             |
| C    | 6.0              | 3.7663561743       | -5.7200304895 | -2.6053652193 |
| C    | 6.0              | 4.3549869223       | -3.9129422192 | -0.4621702848 |
| O    | 8.0              | 3.4156230310       | -4.1244781463 | 1.6435135888  |
| N    | 7.0              | 5.9780158813       | -2.0377671216 | -1.0791847171 |
| C    | 6.0              | 7.0999084057       | -0.2802274667 | 0.7456102857  |
| C    | 6.0              | 5.1940063636       | 1.0079231501  | 2.5460467205  |
| O    | 8.0              | -5.4034446948      | 2.1768320570  | -1.5512193715 |
| O    | 8.0              | -3.8249754745      | -1.1423393596 | 0.3629218759  |
| C    | 6.0              | 3.0443485662       | 2.3016484585  | 1.1726883589  |
| C    | 6.0              | 0.7423032652       | 1.0905230730  | 0.9047252139  |
| C    | 6.0              | -1.2183063443      | 2.3307691360  | -0.2997483362 |
| C    | 6.0              | 3.3069070950       | 4.7242393803  | 0.1974574685  |
| C    | 6.0              | 1.3280616297       | 5.9379914849  | -1.0269904853 |
| C    | 6.0              | -0.9672373496      | 4.7473129346  | -1.2799681033 |
| N    | 7.0              | -3.5968855478      | 1.0907309429  | -0.5241532972 |
| H    | 1.0              | 5.4489870911       | -6.7748377413 | -3.1102433114 |
| H    | 1.0              | 3.1221674824       | -4.6996918397 | -4.2604628284 |
| H    | 1.0              | 2.3237771498       | -7.0208611677 | -1.9893145473 |
| H    | 1.0              | 6.6630226546       | -1.9844012597 | -2.8335307350 |
| H    | 1.0              | 8.4863247739       | -1.2572535969 | 1.8953573712  |
| H    | 1.0              | 8.0784463167       | 1.1463077842  | -0.3433821092 |
| H    | 1.0              | 6.2311824719       | 2.3883301896  | 3.6495711083  |
| H    | 1.0              | 4.4502858038       | -0.4023415600 | 3.8091962625  |
| H    | 1.0              | 0.4990388388       | -0.7869952848 | 1.6052466375  |
| H    | 1.0              | 5.0752181880       | 5.6915712161  | 0.4114878338  |
| H    | 1.0              | 1.5785070148       | 7.8069871786  | -1.7575585521 |
| H    | 1.0              | -2.5303997893      | 5.6390368337  | -2.1920443512 |
| N    | 7.0              | -8.7726938501      | -2.1154537570 | -0.4732440791 |
| C    | 6.0              | -10.2193735800     | -2.3013461024 | 2.0161864508  |
| H    | 1.0              | -9.2659879219      | -0.5393655914 | -1.4530481065 |
| H    | 1.0              | -9.0804735217      | -3.6547678548 | -1.5728567341 |
| H    | 1.0              | -9.5723314018      | -3.9635868757 | 2.9981825603  |
| H    | 1.0              | -12.2115605107     | -2.4268428052 | 1.6141850415  |
| H    | 1.0              | -9.8067330133      | -0.6296378018 | 3.1030056609  |
| H    | 1.0              | -6.8377656167      | -1.9294858225 | -0.1302588123 |

E[B3LYP/6-31++G(d,p)] = -819.236232 hartree  
E[B3LYP/6-311++G(2df,p)] = -819.4728518 hartree  
E[M06/6-31++G(d,p)] = -819.1644663 hartree  
E[M06/6-311++G(2df,p)] = -819.3932871 hartree  
E[MP2/6-311++G(2df,p)] = -818.0532317 hartree

E[UB3LYP/6-31++G(d,p)] = -819.4077703 hartree  
E[UB3LYP/6-311++G(2df,p)] = -819.6455717 hartree  
E[UM06/6-31++G(d,p)] = -819.3408058 hartree  
E[UM06/6-311++G(2df,p)] = -819.571629 hartree  
E[ROMP2/6-311++G(2df,p)] = -818.2114235 hartree

Table S18. B3LYP/6-31++G(d,p) optimized geometry of N-(3-nitrophenethyl)acetamide with the methyl ammonium ion complex (**D5**) and electronic energy of the complex and the charge-neutralized radical formed by vertical electron attachment.

| ATOM | ATOMIC CHARGE | COORDINATES (BOHR) |               |               |
|------|---------------|--------------------|---------------|---------------|
|      |               | X                  | Y             | Z             |
| C    | 6.0           | 4.6615571693       | 0.9345450900  | 4.4003214487  |
| C    | 6.0           | 4.4568809475       | 0.1196385523  | 1.6653021294  |
| O    | 8.0           | 4.0650651612       | 1.6942338343  | -0.0568618550 |
| N    | 7.0           | 4.6949108329       | -2.3623653545 | 1.1926060709  |
| C    | 6.0           | 4.6963848192       | -3.6008350751 | -1.2961441577 |
| C    | 6.0           | 2.3751776967       | -3.0903822913 | -2.9978613069 |
| O    | 8.0           | -7.0696349954      | 1.6678154650  | 1.3633428138  |
| O    | 8.0           | -3.7179036000      | 3.6094144311  | 0.0086927395  |
| C    | 6.0           | -0.1568661542      | -3.1203533454 | -1.6655099993 |
| C    | 6.0           | -1.4053892171      | -0.8357691126 | -1.2459719327 |
| C    | 6.0           | -3.7159760795      | -0.8018674284 | 0.0188972599  |
| C    | 6.0           | -1.3200680887      | -5.3538393876 | -0.8246197293 |
| C    | 6.0           | -3.6566953753      | -5.2985649025 | 0.4109398133  |
| C    | 6.0           | -4.8891368700      | -3.0105224710 | 0.8563671259  |
| N    | 7.0           | -4.9331674855      | 1.6406601025  | 0.4979616950  |
| H    | 1.0           | 6.1477888641       | 2.3616472586  | 4.5623087604  |
| H    | 1.0           | 5.0912052698       | -0.6159183912 | 5.6925349764  |
| H    | 1.0           | 2.8783550355       | 1.7968459554  | 4.9974937581  |
| H    | 1.0           | 5.0484029762       | -3.4864688583 | 2.6945602859  |
| H    | 1.0           | 6.4016546533       | -3.0477122785 | -2.3313171565 |
| H    | 1.0           | 4.8476951790       | -5.6207820806 | -0.8965049058 |
| H    | 1.0           | 2.4162981342       | -4.5290306857 | -4.4882881934 |
| H    | 1.0           | 2.6195948560       | -1.2634141036 | -3.9230900478 |
| H    | 1.0           | -0.5843221727      | 0.9048385974  | -1.9250071719 |
| H    | 1.0           | -0.4089744983      | -7.1641590893 | -1.1595358661 |
| H    | 1.0           | -4.5276511858      | -7.0490558794 | 1.0277652729  |
| H    | 1.0           | -6.6943165170      | -2.9264485618 | 1.8177652221  |
| N    | 7.0           | 1.2139599745       | 5.9094566225  | -0.1267817165 |
| C    | 6.0           | 1.5964027199       | 7.3091577644  | -2.5594637750 |
| H    | 1.0           | -0.5815064809      | 5.1381649606  | -0.0305379720 |
| H    | 1.0           | 1.4247967030       | 7.0889290977  | 1.3875691010  |
| H    | 1.0           | 3.5077282757       | 8.0750826044  | -2.5969559386 |
| H    | 1.0           | 0.2120083586       | 8.8277226708  | -2.6999649022 |
| H    | 1.0           | 1.3467132251       | 5.9861039086  | -4.1168625506 |
| H    | 1.0           | 2.5058711460       | 4.3798746135  | 0.0557658139  |

E[B3LYP/6-31++G(d,p)] = -819.2545141 hartree  
E[B3LYP/6-311++G(2df,p)] = -819.4897993 hartree  
E[M06/6-31++G(d,p)] = -819.1827694 hartree  
E[M06/6-311++G(2df,p)] = -819.4109761 hartree  
E[MP2/6-311++G(2df,p)] = -818.0732093 hartree

E[UB3LYP/6-31++G(d,p)] = -819.4037156 hartree  
E[UB3LYP/6-311++G(2df,p)] = -819.6403233 hartree  
E[UM06/6-31++G(d,p)] = -819.3374324 hartree  
E[UM06/6-311++G(2df,p)] = -819.5676875 hartree  
E[ROMP2/6-311++G(2df,p)] = -818.2054566 hartree

Table S19. B3LYP/6-31++G(d,p) optimized geometry of N-(3,5-dinitrophenethyl)acetamide with the methyl ammonium ion complex (**B6**) and electronic energy of the complex and the charge-neutralized radical formed by vertical electron attachment.

| ATOM | ATOMIC<br>CHARGE | COORDINATES (BOHR) |               |               |
|------|------------------|--------------------|---------------|---------------|
|      |                  | X                  | Y             | Z             |
| C    | 6.0              | 3.9604310333       | -1.4819042223 | -4.8946926644 |
| C    | 6.0              | 4.5267819118       | 1.0346627728  | -3.6758949913 |
| O    | 8.0              | 6.0861460024       | 1.2389232548  | -1.8946581725 |
| N    | 7.0              | 3.3107621360       | 3.0709181136  | -4.5553356715 |
| C    | 6.0              | 3.6569221424       | 5.6400194912  | -3.5704104867 |
| C    | 6.0              | 2.1042854764       | 6.1884557673  | -1.1627861948 |
| C    | 6.0              | -0.7128991289      | 5.8277070763  | -1.5038061465 |
| C    | 6.0              | -1.9232875213      | 3.6747800530  | -0.5603415499 |
| C    | 6.0              | -4.5106436519      | 3.3485188612  | -0.9384190282 |
| C    | 6.0              | -2.1583883314      | 7.6155012442  | -2.8181672627 |
| C    | 6.0              | -4.7379209964      | 7.2195280608  | -3.1524408927 |
| C    | 6.0              | -5.9851023538      | 5.1003137491  | -2.2237161588 |
| N    | 7.0              | 9.3209789481       | -1.2639054324 | 0.8201410787  |
| C    | 6.0              | 9.6521912220       | 0.3301162328  | 3.1450142696  |
| N    | 7.0              | -5.7246225236      | 1.0334344509  | 0.0547453619  |
| H    | 1.0              | 5.7134353458       | -2.2890061917 | -5.6373927721 |
| H    | 1.0              | 2.5975795482       | -1.3488675128 | -6.4379940840 |
| H    | 1.0              | 3.2106633504       | -2.7785586060 | -3.4685731532 |
| H    | 1.0              | 2.0433418133       | 2.8117988862  | -5.9606681968 |
| H    | 1.0              | 5.6646237235       | 5.9055448897  | -3.1704121869 |
| H    | 1.0              | 3.1301232288       | 6.9381856557  | -5.0878037630 |
| H    | 1.0              | 2.5065703446       | 8.1431883290  | -0.6082838982 |
| H    | 1.0              | 2.7856072840       | 4.9738721832  | 0.3644336567  |
| H    | 1.0              | -0.8932167826      | 2.2476022953  | 0.4861131131  |
| H    | 1.0              | -1.3209940545      | 9.3250418590  | -3.5778371098 |
| N    | 7.0              | -6.2074853080      | 9.1325165754  | -4.5719274657 |
| H    | 1.0              | -7.9948448390      | 4.8309522068  | -2.4930021120 |
| H    | 1.0              | 8.7681207132       | -3.0575199564 | 1.2807617882  |
| H    | 1.0              | 10.9810276393      | -1.4128347375 | -0.1589637501 |
| H    | 1.0              | 10.2349827166      | 2.2152879809  | 2.5572150011  |
| H    | 1.0              | 11.0778571989      | -0.5108685235 | 4.3714086411  |
| H    | 1.0              | 7.8428919723       | 0.4349960251  | 4.1220781943  |
| H    | 1.0              | 7.9189156488       | -0.4342401347 | -0.4258686486 |
| O    | 8.0              | -8.0167089687      | 0.8304967771  | -0.2039770231 |
| O    | 8.0              | -4.3391321212      | -0.5434285023 | 1.0637456557  |
| O    | 8.0              | -8.4978521024      | 8.8164410067  | -4.7285668528 |
| O    | 8.0              | -5.0168823467      | 10.8961789425 | -5.5055087954 |

E[B3LYP/6-31++G(d,p)] = -1023.660433 hartree  
E[B3LYP/6-311++G(2df,p)] = -1023.965968 hartree  
E[M06/6-31++G(d,p)] = -1023.582483 hartree  
E[M06/6-311++G(2df,p)] = -1023.875477 hartree  
E[MP2/6-311++G(2df,p)] = -1022.27865 hartree

E[UB3LYP/6-31++G(d,p)] = -1023.806167 hartree  
E[UB3LYP/6-311++G(2df,p)] = -1024.112007 hartree  
E[UM06/6-31++G(d,p)] = -1023.729469 hartree  
E[UM06/6-311++G(2df,p)] = -1024.023608 hartree  
E[ROMP2/6-311++G(2df,p)] = -1022.388559 hartree

**7. Energies and molecular orbitals of excited states of anionic radicals of N-phenethylacetamide, N-(4-cyanophenethyl)acetamide, N-(perfluorophenethyl)acetamide, N-(3,5-dicyanophenethyl)acetamide, N-(3-nitrophenethyl)acetamide, N-(3,5-dinitrophenethyl)acetamide and neutralized radicals of their methyl ammonium complexes obtained by the time-dependent density functional calculations at the UB3LYP/6-31++G(d,p) and UB3LYP/6-311++G(2df,p) level of theories.**

Table S20. TDDFT excited electronic energy of N-phenethylacetamide (**A1**) anion formed by vertical electron attachment at the UB3LYP/6-31++G(d,p) level.

| STATE | ENERGY          | EXCITATION | TRANSITION DIPOLE |         |         | OSCILLATOR |
|-------|-----------------|------------|-------------------|---------|---------|------------|
|       | HARTREE         |            | EV                | X       | Y       |            |
| 0     | -518.5950060334 | 0.000      |                   |         |         |            |
| 1     | -518.5842656774 | 0.292      | 0.9003            | 2.9264  | 1.0912  | 0.076      |
| 2     | -518.5804542548 | 0.396      | 2.4222            | -3.2444 | 1.2356  | 0.174      |
| 3     | -518.5788747535 | 0.439      | 3.9224            | 0.7771  | -0.9748 | 0.182      |
| 4     | -518.5779226784 | 0.465      | -0.2359           | -0.9299 | 1.0713  | 0.024      |
| 5     | -518.5736007102 | 0.582      | 0.0702            | -0.2625 | -1.7687 | 0.046      |
| 6     | -518.5703701482 | 0.670      | 0.2074            | -0.1638 | -1.2479 | 0.027      |
| 7     | -518.5651875614 | 0.811      | -0.5850           | 0.1396  | -0.8043 | 0.020      |
| 8     | -518.5621222404 | 0.895      | 0.4629            | 0.1734  | 0.3378  | 0.008      |
| 9     | -518.5591802602 | 0.975      | 0.5636            | 0.1339  | 0.1133  | 0.008      |
| 10    | -518.5544157754 | 1.105      | -0.1271           | -0.8579 | -0.5750 | 0.029      |
| 11    | -518.5476654053 | 1.288      | 0.0171            | -0.5356 | -0.6277 | 0.021      |
| 12    | -518.5402508867 | 1.490      | 0.1680            | -0.0740 | 0.3113  | 0.005      |
| 13    | -518.5327174359 | 1.695      | -0.1992           | 0.1166  | 0.5679  | 0.016      |
| 14    | -518.5289791740 | 1.797      | -0.2024           | -0.2080 | 0.1928  | 0.005      |
| 15    | -518.5245009812 | 1.919      | -0.2216           | -0.3174 | -0.0726 | 0.007      |

Table S21. TDDFT excited electronic energy of N-(4-cyanophenethyl)acetamide (**A2**) anion formed by vertical electron attachment at the UB3LYP/6-31++G(d,p) level.

| STATE | ENERGY          | EXCITATION | TRANSITION DIPOLE |         |         | OSCILLATOR |
|-------|-----------------|------------|-------------------|---------|---------|------------|
|       | HARTREE         |            | EV                | X       | Y       |            |
| 0     | -610.8129435541 | 0.000      |                   |         |         |            |
| 1     | -610.8108974679 | 0.056      | -0.7876           | 0.9216  | 0.8124  | 0.003      |
| 2     | -610.7977600628 | 0.413      | -1.5654           | 0.8886  | -0.4904 | 0.035      |
| 3     | -610.7899668749 | 0.625      | 0.8142            | 1.0666  | -0.2970 | 0.029      |
| 4     | -610.7882659256 | 0.672      | 0.0125            | 0.0335  | 0.1669  | 0.000      |
| 5     | -610.7866971104 | 0.714      | 0.1638            | 0.2819  | -0.2276 | 0.003      |
| 6     | -610.7811095255 | 0.866      | -0.9308           | -0.1674 | -0.3482 | 0.022      |
| 7     | -610.7747671869 | 1.039      | -0.4159           | 1.0605  | 0.9090  | 0.054      |
| 8     | -610.7704473726 | 1.156      | 0.6261            | -0.0558 | 0.7643  | 0.028      |
| 9     | -610.7638551444 | 1.336      | -0.6079           | -0.6431 | -0.0950 | 0.026      |
| 10    | -610.7597494615 | 1.447      | 0.4293            | -0.1437 | 0.2376  | 0.009      |
| 11    | -610.7511475314 | 1.682      | 0.5787            | 0.0130  | -0.0208 | 0.014      |
| 12    | -610.7464061471 | 1.811      | 0.2373            | 0.5210  | -0.1442 | 0.015      |

|    |                 |       |        |         |         |       |
|----|-----------------|-------|--------|---------|---------|-------|
| 13 | -610.7424692268 | 1.918 | 0.1977 | 0.3276  | -0.3722 | 0.013 |
| 14 | -610.7310685057 | 2.228 | 0.2244 | -0.0912 | 0.0888  | 0.004 |
| 15 | -610.7276418865 | 2.321 | 0.0718 | 0.0522  | 0.0352  | 0.001 |

Table S22. TDDFT excited electronic energy of N-(perfluorophenethyl)acetamide (**A3**) anion formed by vertical electron attachment at the UB3LYP/6-31++G(d,p) level.

| STATE | ENERGY           | EXCITATION | TRANSITION DIPOLE |         |         | OSCILLATOR |
|-------|------------------|------------|-------------------|---------|---------|------------|
|       | HARTREE          |            | EV                | X       | Y       |            |
| 0     | -1014.6204474469 | 0.000      |                   |         |         |            |
| 1     | -1014.6085379802 | 0.324      | -0.6261           | -0.5672 | -0.4075 | 0.007      |
| 2     | -1014.5998223749 | 0.561      | -2.1605           | 2.4883  | 1.4873  | 0.180      |
| 3     | -1014.5966336102 | 0.648      | -0.0071           | 0.0688  | -0.1406 | 0.000      |
| 4     | -1014.5915406742 | 0.787      | 1.0414            | 1.7368  | -1.8450 | 0.145      |
| 5     | -1014.5894383989 | 0.844      | 2.2817            | 0.8567  | 1.0519  | 0.146      |
| 6     | -1014.5807302286 | 1.081      | 0.2893            | -0.8480 | 0.0222  | 0.021      |
| 7     | -1014.5744099810 | 1.253      | 0.4364            | -0.5350 | 0.1036  | 0.015      |
| 8     | -1014.5680483215 | 1.426      | -0.3045           | 0.7243  | -0.7563 | 0.042      |
| 9     | -1014.5660234699 | 1.481      | -0.3399           | -0.6485 | -0.6677 | 0.036      |
| 10    | -1014.5575483069 | 1.712      | 0.0786            | 0.2589  | -0.5612 | 0.016      |
| 11    | -1014.5509148026 | 1.892      | -0.3414           | -0.2264 | 0.1442  | 0.009      |
| 12    | -1014.5480986761 | 1.969      | 0.2071            | -0.2283 | -0.0222 | 0.005      |
| 13    | -1014.5407704611 | 2.168      | 0.6808            | 0.1324  | 0.2520  | 0.029      |
| 14    | -1014.5359552016 | 2.299      | -0.2094           | 0.3593  | 0.6202  | 0.031      |
| 15    | -1014.5299176064 | 2.463      | -0.2351           | -0.0495 | 0.3104  | 0.009      |

Table S23. TDDFT excited electronic energy of N-(3,5-dicyanophenethyl)acetamide (**A4**) anion formed by vertical electron attachment at the UB3LYP/6-31++G(d,p) level.

| STATE | ENERGY          | EXCITATION | TRANSITION DIPOLE |         |         | OSCILLATOR |
|-------|-----------------|------------|-------------------|---------|---------|------------|
|       | HARTREE         |            | EV                | X       | Y       |            |
| 0     | -703.0346715024 | 0.000      |                   |         |         |            |
| 1     | -703.0208283171 | 0.377      | 0.3926            | -0.3871 | -0.0112 | 0.003      |
| 2     | -703.0155638863 | 0.520      | 0.0856            | 0.2909  | -0.2202 | 0.002      |
| 3     | -703.0032729295 | 0.854      | 0.3223            | -0.3987 | -0.1094 | 0.006      |
| 4     | -702.9944263559 | 1.095      | 0.2068            | 0.1469  | -0.0960 | 0.002      |
| 5     | -702.9929145981 | 1.136      | 0.0162            | -0.2532 | -0.0445 | 0.002      |
| 6     | -702.9831336024 | 1.402      | 0.0479            | -0.1292 | -0.0651 | 0.001      |
| 7     | -702.9744803589 | 1.638      | -0.0204           | -0.0407 | -0.2088 | 0.002      |
| 8     | -702.9734264813 | 1.667      | 0.0358            | 0.3895  | -0.2743 | 0.009      |
| 9     | -702.9666123626 | 1.852      | 0.0905            | 0.0391  | -0.0504 | 0.001      |
| 10    | -702.9646999058 | 1.904      | -0.0553           | -0.1337 | -0.0923 | 0.001      |
| 11    | -702.9496139618 | 2.315      | -0.0455           | -0.0635 | -0.1159 | 0.001      |
| 12    | -702.9475173057 | 2.372      | 0.0441            | 0.0375  | -0.1708 | 0.002      |
| 13    | -702.9470682083 | 2.384      | -0.3631           | -0.1371 | -0.1534 | 0.010      |
| 14    | -702.9460180734 | 2.412      | 0.1184            | -0.0349 | 0.1785  | 0.003      |
| 15    | -702.9382895153 | 2.623      | -0.2312           | -0.2772 | 0.0362  | 0.008      |

Table S24. TDDFT excited electronic energy of N-(3-nitrophenethyl)acetamide (**A5**) anion formed by vertical electron attachment at the UB3LYP/6-31++G(d,p) level.

| STATE | ENERGY | EXCITATION | TRANSITION | DIPOLE | OSCILLATOR |
|-------|--------|------------|------------|--------|------------|
|-------|--------|------------|------------|--------|------------|

|    | HARTREE         | EV    | X       | Y       | Z       | STRENGTH |
|----|-----------------|-------|---------|---------|---------|----------|
| 0  | -723.0653980895 | 0.000 |         |         |         |          |
| 1  | -723.0532665733 | 0.330 | -1.4568 | -0.3353 | -0.4518 | 0.020    |
| 2  | -723.0413116417 | 0.655 | -0.0612 | -0.9730 | 0.1773  | 0.016    |
| 3  | -723.0289231187 | 0.993 | 0.2342  | -0.2166 | -0.3479 | 0.005    |
| 4  | -723.0234772894 | 1.141 | -0.1985 | 0.1099  | 0.0084  | 0.001    |
| 5  | -723.0155619171 | 1.356 | 0.2695  | 0.0756  | 0.1541  | 0.003    |
| 6  | -723.0145528862 | 1.384 | -0.0670 | -0.0162 | -0.1242 | 0.001    |
| 7  | -723.0085857153 | 1.546 | 0.1442  | -0.3474 | 0.2212  | 0.007    |
| 8  | -723.0061786411 | 1.611 | 0.0947  | -0.1752 | 0.2450  | 0.004    |
| 9  | -722.9958239686 | 1.893 | -0.1419 | -0.1007 | -0.1726 | 0.003    |
| 10 | -722.9895905935 | 2.063 | -0.2488 | 0.3588  | -0.1380 | 0.011    |
| 11 | -722.9863244783 | 2.152 | 0.5654  | -0.2376 | -0.1676 | 0.021    |
| 12 | -722.9813624509 | 2.287 | 0.1395  | -0.2488 | -0.0372 | 0.005    |
| 13 | -722.9756797268 | 2.441 | -0.8732 | 0.8226  | 0.2855  | 0.091    |
| 14 | -722.9734309941 | 2.503 | -0.3032 | 0.3966  | 0.0436  | 0.015    |
| 15 | -722.9673042641 | 2.669 | -0.0611 | -0.0017 | 0.0206  | 0.000    |

Table S25. TDDFT excited electronic energy of N-(3,5-dinitrophenethyl)acetamide (**A6**) anion formed by vertical electron attachment at the UB3LYP/6-31++G(d,p) level.

| STATE | ENERGY          | EXCITATION | TRANSITION DIPOLE |         |         | OSCILLATOR |
|-------|-----------------|------------|-------------------|---------|---------|------------|
|       | HARTREE         |            | EV                | X       | Y       |            |
| 0     | -927.5141941037 | 0.000      |                   |         |         |            |
| 1     | -927.4931097678 | 0.574      | -0.3382           | 1.1055  | 0.6701  | 0.025      |
| 2     | -927.4788787928 | 0.961      | -0.3293           | 0.1175  | 0.1367  | 0.003      |
| 3     | -927.4615874087 | 1.432      | -0.1131           | -0.5134 | -0.2155 | 0.011      |
| 4     | -927.4472551955 | 1.822      | -0.0707           | 0.1919  | 0.0232  | 0.002      |
| 5     | -927.4423774962 | 1.954      | -0.0640           | 0.0859  | -0.0252 | 0.001      |
| 6     | -927.4378082953 | 2.079      | -0.2572           | 0.5819  | 0.4367  | 0.030      |
| 7     | -927.4295828218 | 2.302      | 0.2597            | -0.6117 | -0.2572 | 0.029      |
| 8     | -927.4240463907 | 2.453      | -0.0732           | 0.0048  | -0.3847 | 0.009      |
| 9     | -927.4205187908 | 2.549      | 0.0639            | -0.0396 | -0.0761 | 0.001      |
| 10    | -927.4131701349 | 2.749      | 0.2652            | -0.2136 | 0.2849  | 0.013      |
| 11    | -927.4098294701 | 2.840      | -0.1607           | 0.0075  | -0.1460 | 0.003      |
| 12    | -927.4074281209 | 2.905      | -0.6263           | -0.0417 | -0.3069 | 0.035      |
| 13    | -927.4004526538 | 3.095      | -0.0158           | 0.0220  | 0.1030  | 0.001      |
| 14    | -927.3965177762 | 3.202      | 0.1482            | 0.0907  | -0.0807 | 0.003      |
| 15    | -927.3884062968 | 3.423      | 0.0208            | 0.1254  | 0.0095  | 0.001      |

Table S26. TDDFT excited electronic energy of N-phenethylacetamide with the methyl ammonium complex radical (**B1**) neutral formed by vertical electron attachment at the UB3LYP/6-31++G(d,p) level.

| STATE | ENERGY          | EXCITATION | TRANSITION DIPOLE |         |         | OSCILLATOR |
|-------|-----------------|------------|-------------------|---------|---------|------------|
|       | HARTREE         |            | EV                | X       | Y       |            |
| 0     | -614.9344924561 | 0.000      |                   |         |         |            |
| 1     | -614.9218296043 | 0.345      | 0.0679            | 0.4267  | -0.0240 | 0.002      |
| 2     | -614.9208358885 | 0.372      | -0.9438           | 0.3345  | 0.1251  | 0.009      |
| 3     | -614.9141723214 | 0.553      | 0.5112            | -0.1789 | -0.8625 | 0.014      |
| 4     | -614.9063503860 | 0.766      | 2.5788            | 0.0847  | 0.5068  | 0.130      |
| 5     | -614.9012666196 | 0.904      | 0.3049            | 1.9526  | -0.0978 | 0.087      |
| 6     | -614.8946352212 | 1.085      | 0.0355            | -0.2354 | -2.5672 | 0.177      |
| 7     | -614.8911470875 | 1.179      | 1.4478            | -0.2183 | 0.1470  | 0.063      |
| 8     | -614.8895999984 | 1.222      | -0.6364           | -0.3865 | 0.4268  | 0.022      |
| 9     | -614.8854199076 | 1.335      | -0.3620           | 0.2349  | 0.9610  | 0.036      |
| 10    | -614.8760935992 | 1.589      | -0.9952           | 0.2134  | -0.1769 | 0.042      |
| 11    | -614.8723636544 | 1.691      | -0.0942           | 0.7706  | 0.0589  | 0.025      |

|    |                 |       |         |         |         |       |
|----|-----------------|-------|---------|---------|---------|-------|
| 12 | -614.8704328226 | 1.743 | -0.0874 | -0.0489 | 0.3271  | 0.005 |
| 13 | -614.8670936800 | 1.834 | -0.0728 | 0.5532  | -0.2260 | 0.016 |
| 14 | -614.8635481988 | 1.930 | -0.0385 | -0.1069 | -0.1427 | 0.002 |
| 15 | -614.8601224522 | 2.024 | 0.2203  | -0.3743 | 0.1617  | 0.011 |

Table S27. TDDFT excited electronic energy of N-(4-cyanophenethyl)acetamide with the methyl ammonium complex radical (**B2**) neutral formed by vertical electron attachment at the UB3LYP/6-31++G(d,p) level.

| STATE | ENERGY<br>HARTREE | EXCITATION<br>EV | TRANSITION DIPOLE |         |         | OSCILLATOR<br>STRENGTH |
|-------|-------------------|------------------|-------------------|---------|---------|------------------------|
|       |                   |                  | X                 | Y       | Z       |                        |
| 0     | -707.1363112354   | 0.000            |                   |         |         |                        |
| 1     | -707.1285651336   | 0.211            | 2.3991            | -0.7678 | 0.0443  | 0.033                  |
| 2     | -707.1153349327   | 0.571            | -0.9153           | 0.0477  | 0.3929  | 0.014                  |
| 3     | -707.1105285338   | 0.702            | -0.2846           | 0.0920  | 0.7868  | 0.012                  |
| 4     | -707.1007956361   | 0.966            | 2.3088            | 0.4796  | 0.6257  | 0.141                  |
| 5     | -707.0987625911   | 1.022            | 0.2305            | -1.5579 | -0.1194 | 0.062                  |
| 6     | -707.0941636327   | 1.147            | -0.3187           | -0.2489 | 2.3890  | 0.165                  |
| 7     | -707.0831433377   | 1.447            | 0.1464            | 0.0512  | -0.0699 | 0.001                  |
| 8     | -707.0805336233   | 1.518            | -1.0489           | 0.1008  | -0.1911 | 0.043                  |
| 9     | -707.0798108181   | 1.537            | 0.2488            | -0.0413 | -0.1789 | 0.004                  |
| 10    | -707.0675356101   | 1.871            | -0.4862           | 0.6821  | 0.0471  | 0.032                  |
| 11    | -707.0631471434   | 1.991            | 0.2240            | 0.3751  | -0.0799 | 0.010                  |
| 12    | -707.0608507473   | 2.053            | 0.3091            | -0.0807 | 0.1164  | 0.006                  |
| 13    | -707.0560899569   | 2.183            | -0.0824           | 0.2467  | 0.0502  | 0.004                  |
| 14    | -707.0544476569   | 2.228            | -0.2713           | 0.1043  | -0.0716 | 0.005                  |
| 15    | -707.0512292773   | 2.315            | -0.1510           | 0.1767  | 0.1220  | 0.004                  |

Table S28. TDDFT excited electronic energy of N-(perfluorophenethyl)acetamide with the methyl ammonium complex radical (**B3**) neutral formed by vertical electron attachment at the UB3LYP/6-31++G(d,p) level.

| STATE | ENERGY<br>HARTREE | EXCITATION<br>EV | TRANSITION DIPOLE |         |         | OSCILLATOR<br>STRENGTH |
|-------|-------------------|------------------|-------------------|---------|---------|------------------------|
|       |                   |                  | X                 | Y       | Z       |                        |
| 0     | -1110.9455974862  | 0.000            |                   |         |         |                        |
| 1     | -1110.9349876477  | 0.289            | 1.1021            | -0.4573 | -0.3210 | 0.011                  |
| 2     | -1110.9298857435  | 0.428            | -2.6703           | 0.6584  | 0.1374  | 0.079                  |
| 3     | -1110.9279169790  | 0.481            | -0.7426           | 0.0341  | 0.3269  | 0.008                  |
| 4     | -1110.9217968396  | 0.648            | 0.5891            | 0.1962  | -0.6736 | 0.013                  |
| 5     | -1110.9099848549  | 0.969            | 1.1297            | 2.0256  | -0.1275 | 0.128                  |
| 6     | -1110.9056010943  | 1.088            | 0.0028            | 0.2407  | 2.3130  | 0.144                  |
| 7     | -1110.9027005380  | 1.167            | 1.2836            | -0.2227 | 1.4143  | 0.106                  |
| 8     | -1110.8956600472  | 1.359            | -0.1139           | -0.1473 | -0.2025 | 0.003                  |
| 9     | -1110.8945625153  | 1.389            | -1.0311           | -0.1244 | 0.5182  | 0.046                  |
| 10    | -1110.8791321096  | 1.809            | 0.6263            | -0.6017 | -0.1224 | 0.034                  |
| 11    | -1110.8756772907  | 1.903            | 0.0183            | 0.1997  | 0.2578  | 0.005                  |
| 12    | -1110.8737216505  | 1.956            | 0.3390            | -0.0618 | 0.1147  | 0.006                  |
| 13    | -1110.8696569777  | 2.066            | -0.0701           | -0.0945 | -0.0657 | 0.001                  |
| 14    | -1110.8668635754  | 2.142            | -0.5015           | -0.2469 | 0.2837  | 0.021                  |
| 15    | -1110.8603041372  | 2.321            | 0.1157            | -0.2168 | 0.0487  | 0.004                  |

Table S29. TDDFT excited electronic energy of N-(3,5-dicyanophenethyl)acetamide with the methyl ammonium complex radical (**B4**) neutral formed by vertical electron attachment at the UB3LYP/6-31++G(d,p) level.

| STATE | ENERGY          | EXCITATION | TRANSITION DIPOLE |         |         | OSCILLATOR |
|-------|-----------------|------------|-------------------|---------|---------|------------|
|       | HARTREE         |            | EV                | X       | Y       |            |
| 0     | -799.3380497965 | 0.000      |                   |         |         |            |
| 1     | -799.3304428405 | 0.207      | 2.6116            | -0.6665 | 0.0770  | 0.037      |
| 2     | -799.3192441200 | 0.512      | -0.5695           | 0.0179  | 0.0880  | 0.004      |
| 3     | -799.3085210749 | 0.804      | -0.0513           | -0.2520 | 0.8790  | 0.017      |
| 4     | -799.2987182486 | 1.070      | -0.8176           | -1.2084 | -1.1864 | 0.093      |
| 5     | -799.2949900346 | 1.172      | 0.4021            | -0.6842 | 1.2063  | 0.060      |
| 6     | -799.2932620975 | 1.219      | 1.3648            | -0.2295 | -0.9564 | 0.084      |
| 7     | -799.2770958489 | 1.659      | -0.7906           | 0.3797  | -0.1800 | 0.033      |
| 8     | -799.2727763773 | 1.776      | 0.6169            | -0.0542 | -0.0739 | 0.017      |
| 9     | -799.2684224084 | 1.895      | 0.1213            | 0.2720  | 0.0781  | 0.004      |
| 10    | -799.2605215179 | 2.110      | 0.1656            | -0.5943 | 0.2099  | 0.022      |
| 11    | -799.2551485116 | 2.256      | -0.0745           | -0.0268 | -0.1189 | 0.001      |
| 12    | -799.2511461057 | 2.365      | -0.1597           | -0.3909 | 0.2193  | 0.013      |
| 13    | -799.2498204115 | 2.401      | -0.1327           | -0.1864 | 0.0819  | 0.003      |
| 14    | -799.2407019787 | 2.649      | -0.1090           | 0.1527  | -0.1013 | 0.003      |
| 15    | -799.2398935215 | 2.671      | -0.0796           | 0.0926  | 0.0197  | 0.001      |

Table S30. TDDFT excited electronic energy of N-(3-nitrophenethyl)acetamide with the methyl ammonium complex radical (**B5**) neutral formed by vertical electron attachment at the UB3LYP/6-31++G(d,p) level.

| STATE | ENERGY          | EXCITATION | TRANSITION DIPOLE |         |         | OSCILLATOR |
|-------|-----------------|------------|-------------------|---------|---------|------------|
|       | HARTREE         |            | EV                | X       | Y       |            |
| 0     | -819.3758247932 | 0.000      |                   |         |         |            |
| 1     | -819.3667843673 | 0.246      | -2.7875           | 0.4324  | -0.0124 | 0.048      |
| 2     | -819.3436963692 | 0.874      | -0.1056           | -0.2017 | -1.0017 | 0.023      |
| 3     | -819.3363221215 | 1.075      | 0.4655            | 1.0750  | -1.1184 | 0.069      |
| 4     | -819.3321044206 | 1.190      | -0.1917           | -0.4687 | -1.3675 | 0.062      |
| 5     | -819.3293345753 | 1.265      | 1.2527            | -0.0898 | -0.2646 | 0.051      |
| 6     | -819.3250092640 | 1.383      | 0.8716            | -0.3444 | 0.3312  | 0.033      |
| 7     | -819.3072219416 | 1.867      | 0.4682            | -0.5509 | 0.0029  | 0.024      |
| 8     | -819.3070649938 | 1.871      | 0.4604            | 0.0590  | -0.0523 | 0.010      |
| 9     | -819.3023830259 | 1.998      | -0.1015           | 0.1057  | -0.0031 | 0.001      |
| 10    | -819.2924923029 | 2.268      | 0.2060            | 0.8047  | 0.2594  | 0.042      |
| 11    | -819.2917998190 | 2.286      | -0.4052           | -0.6743 | 0.0294  | 0.035      |
| 12    | -819.2888323516 | 2.367      | 0.0640            | -0.2524 | -0.1032 | 0.005      |
| 13    | -819.2882804203 | 2.382      | 0.3350            | 0.5069  | 0.1954  | 0.024      |
| 14    | -819.2841028928 | 2.496      | 0.0521            | 0.0359  | -0.0006 | 0.000      |
| 15    | -819.2749954846 | 2.744      | 0.2124            | -0.5230 | -0.0313 | 0.021      |

Table S31. TDDFT excited electronic energy of N-(3,5-dicyanophenethyl)acetamide with the methyl ammonium complex radical (**C4**) neutral formed by vertical electron attachment at the UB3LYP/6-31++G(d,p) level.

| STATE | ENERGY | EXCITATION | TRANSITION DIPOLE | OSCILLATOR |
|-------|--------|------------|-------------------|------------|
|-------|--------|------------|-------------------|------------|



|    | HARTREE         | EV    | X       | Y       | Z       | STRENGTH |
|----|-----------------|-------|---------|---------|---------|----------|
| 0  | -799.3378863397 | 0.000 |         |         |         |          |
| 1  | -799.3331418925 | 0.129 | -1.5580 | 0.8639  | -0.0417 | 0.010    |
| 2  | -799.3140698206 | 0.648 | -0.4670 | 0.2250  | 0.0711  | 0.004    |
| 3  | -799.2981574535 | 1.081 | -0.9060 | -0.5877 | -0.5754 | 0.040    |
| 4  | -799.2964648525 | 1.127 | -0.7889 | -0.1831 | 1.6520  | 0.093    |
| 5  | -799.2847558059 | 1.446 | -0.5705 | 0.4152  | -0.0432 | 0.018    |
| 6  | -799.2782197559 | 1.624 | -1.0303 | 0.7811  | -0.0870 | 0.067    |
| 7  | -799.2714025304 | 1.809 | 0.3949  | 0.0256  | 0.0965  | 0.007    |
| 8  | -799.2651806184 | 1.978 | -0.2802 | 0.2369  | -0.1398 | 0.007    |
| 9  | -799.2598366939 | 2.124 | -0.1603 | -0.2851 | -0.0855 | 0.006    |
| 10 | -799.2564932257 | 2.215 | -0.1996 | -0.0297 | 0.0429  | 0.002    |
| 11 | -799.2546940229 | 2.264 | 0.5365  | -0.2594 | 0.0033  | 0.020    |
| 12 | -799.2514947659 | 2.351 | -0.1849 | -0.0789 | -0.0284 | 0.002    |
| 13 | -799.2440356938 | 2.554 | 0.6555  | 0.4201  | 0.0453  | 0.038    |
| 14 | -799.2396720234 | 2.673 | -0.1591 | -0.0423 | -0.1315 | 0.003    |
| 15 | -799.2385742727 | 2.702 | -0.2168 | 0.5392  | 0.0096  | 0.022    |

Table S32. TDDFT excited electronic energy of N-(3-nitrophenethyl)acetamide with the methyl ammonium complex radical (**C5**) neutral formed by vertical electron attachment at the UB3LYP/6-31++G(d,p) level.

| STATE | ENERGY          | EXCITATION | TRANSITION DIPOLE |         |         | OSCILLATOR |
|-------|-----------------|------------|-------------------|---------|---------|------------|
|       | HARTREE         |            | EV                | X       | Y       |            |
| 0     | -819.4077702748 | 0.000      |                   |         |         |            |
| 1     | -819.3731312720 | 0.943      | -0.3012           | -0.0412 | 0.1724  | 0.003      |
| 2     | -819.3392730134 | 1.864      | -0.5970           | -0.2648 | 0.1100  | 0.020      |
| 3     | -819.3266496404 | 2.207      | 0.0414            | -0.0550 | -0.0934 | 0.001      |
| 4     | -819.3244095000 | 2.268      | 0.1184            | -0.0831 | -0.0645 | 0.001      |
| 5     | -819.3176243206 | 2.453      | 0.0646            | -0.2842 | 0.0603  | 0.005      |
| 6     | -819.3123693658 | 2.596      | -0.0526           | 0.1161  | 0.2963  | 0.007      |
| 7     | -819.3072227445 | 2.736      | 0.0679            | 0.0917  | 0.1251  | 0.002      |
| 8     | -819.3012656397 | 2.898      | 0.5426            | 0.2272  | 0.1416  | 0.026      |
| 9     | -819.2964821249 | 3.028      | -0.3716           | -0.1150 | -0.0382 | 0.011      |
| 10    | -819.2958539624 | 3.045      | -0.5333           | -0.1365 | 0.0211  | 0.023      |
| 11    | -819.2912648761 | 3.170      | 0.3956            | 0.1230  | -0.0995 | 0.014      |
| 12    | -819.2893930146 | 3.221      | -0.3699           | -0.3316 | -0.1175 | 0.021      |
| 13    | -819.2824156675 | 3.411      | 0.1172            | 0.0603  | 0.1247  | 0.003      |
| 14    | -819.2814253884 | 3.438      | 0.0954            | 0.0324  | 0.0115  | 0.001      |
| 15    | -819.2760877973 | 3.583      | -0.0316           | 0.0437  | -0.1565 | 0.002      |

Table S33. TDDFT excited electronic energy of N-(3-nitrophenethyl)acetamide with the methyl ammonium complex radical (**D5**) neutral formed by vertical electron attachment at the UB3LYP/6-31++G(d,p) level.

| STATE | ENERGY          | EXCITATION | TRANSITION DIPOLE |         |        | OSCILLATOR |
|-------|-----------------|------------|-------------------|---------|--------|------------|
|       | HARTREE         |            | EV                | X       | Y      |            |
| 0     | -819.4037155691 | 0.000      |                   |         |        |            |
| 1     | -819.3845377943 | 0.522      | 0.4535            | 0.5072  | 0.3360 | 0.007      |
| 2     | -819.3686284152 | 0.955      | 0.1863            | -0.1072 | 0.0014 | 0.001      |
| 3     | -819.3659058184 | 1.029      | 0.1702            | -0.0872 | 0.0024 | 0.001      |
| 4     | -819.3571590889 | 1.267      | 0.2700            | 0.5903  | 0.0497 | 0.013      |

|    |                 |       |         |         |         |       |
|----|-----------------|-------|---------|---------|---------|-------|
| 5  | -819.3440963239 | 1.622 | -0.1249 | -0.0878 | -0.0270 | 0.001 |
| 6  | -819.3406084467 | 1.717 | -0.0857 | 0.1439  | -0.2001 | 0.003 |
| 7  | -819.3334482360 | 1.912 | 0.2766  | -0.0354 | -0.2988 | 0.008 |
| 8  | -819.3277100536 | 2.068 | 0.1117  | -0.0541 | 0.2262  | 0.003 |
| 9  | -819.3236931202 | 2.178 | -0.0633 | -0.1179 | -0.0481 | 0.001 |
| 10 | -819.3205472622 | 2.263 | -0.2737 | 0.4097  | 0.0694  | 0.014 |
| 11 | -819.3132618982 | 2.461 | -0.1585 | 0.5042  | 0.1895  | 0.019 |
| 12 | -819.3107475706 | 2.530 | -0.4284 | 0.8195  | 0.2102  | 0.056 |
| 13 | -819.3073704881 | 2.622 | -0.2812 | 0.5090  | -0.0893 | 0.022 |
| 14 | -819.3033536667 | 2.731 | 0.2411  | -0.4211 | 0.0744  | 0.016 |
| 15 | -819.2993620752 | 2.840 | 0.0150  | 0.1106  | -0.1049 | 0.002 |

Table S34. TDDFT excited electronic energy of N-(3,5-dinitrophenethyl)acetamide with the methyl ammonium complex radical (**B6**) neutral formed by vertical electron attachment at the UB3LYP/6-31++G(d,p) level.

| STATE | ENERGY           | EXCITATION | TRANSITION DIPOLE |         |         | OSCILLATOR |
|-------|------------------|------------|-------------------|---------|---------|------------|
|       | HARTREE          |            | EV                | X       | Y       |            |
| 0     | -1023.8061672182 | 0.000      |                   |         |         |            |
| 1     | -1023.8013014568 | 0.132      | 1.8250            | -0.9868 | 0.3009  | 0.014      |
| 2     | -1023.7853272337 | 0.567      | 0.1012            | 0.8987  | -0.5382 | 0.015      |
| 3     | -1023.7729650521 | 0.903      | 0.3418            | 0.0751  | -0.5531 | 0.009      |
| 4     | -1023.7646098653 | 1.131      | -0.9952           | -1.0041 | -0.0021 | 0.055      |
| 5     | -1023.7606083681 | 1.240      | 0.2460            | 0.2919  | -1.1052 | 0.042      |
| 6     | -1023.7549806592 | 1.393      | 0.8191            | -0.6193 | 0.3279  | 0.040      |
| 7     | -1023.7422638132 | 1.739      | -0.4179           | 0.7171  | -0.5272 | 0.041      |
| 8     | -1023.7351786760 | 1.932      | -0.2769           | -0.3261 | -0.0728 | 0.009      |
| 9     | -1023.7291211632 | 2.097      | -0.3577           | 0.2095  | 0.5070  | 0.022      |
| 10    | -1023.7235252481 | 2.249      | -0.1132           | 0.5906  | -0.1194 | 0.021      |
| 11    | -1023.7158272243 | 2.458      | 0.0730            | -0.4448 | -0.0126 | 0.012      |
| 12    | -1023.7106977667 | 2.598      | 0.0574            | 0.1501  | 0.0439  | 0.002      |
| 13    | -1023.7065253913 | 2.711      | -0.3057           | -0.0257 | -0.3026 | 0.012      |
| 14    | -1023.7031754264 | 2.803      | 0.4398            | -0.0460 | -0.0907 | 0.014      |
| 15    | -1023.7020007189 | 2.835      | 0.4830            | 0.1948  | 0.0853  | 0.019      |

Table S35. TDDFT excited electronic energy of N-phenethylacetamide (**A1**) anion formed by vertical electron attachment at the UB3LYP/6-311++G(2df,p) level.

| STATE | ENERGY          | EXCITATION | TRANSITION DIPOLE |         |         | OSCILLATOR |
|-------|-----------------|------------|-------------------|---------|---------|------------|
|       | HARTREE         |            | EV                | X       | Y       |            |
| 0     | -518.7373883443 | 0.000      |                   |         |         |            |
| 1     | -518.7272245117 | 0.277      | 0.9071            | 2.7572  | 1.0916  | 0.065      |
| 2     | -518.7236248943 | 0.375      | 1.6095            | -3.4751 | 1.1728  | 0.147      |
| 3     | -518.7220964495 | 0.416      | 3.7948            | -0.4963 | 0.0957  | 0.149      |
| 4     | -518.7216674700 | 0.428      | -2.2704           | -1.3344 | 1.3218  | 0.091      |
| 5     | -518.7169395310 | 0.556      | -0.1826           | 0.2483  | 1.9197  | 0.052      |
| 6     | -518.7134414323 | 0.652      | 0.3186            | -0.1684 | -1.3229 | 0.030      |
| 7     | -518.7082863743 | 0.792      | -0.5548           | 0.1908  | -0.8753 | 0.022      |
| 8     | -518.7049566252 | 0.883      | -0.4236           | -0.0953 | -0.3334 | 0.006      |
| 9     | -518.7024093312 | 0.952      | -0.6667           | -0.2210 | -0.2647 | 0.013      |
| 10    | -518.6976601828 | 1.081      | 0.1310            | 0.8535  | 0.5510  | 0.028      |
| 11    | -518.6904747457 | 1.277      | -0.0245           | -0.5444 | -0.6253 | 0.022      |
| 12    | -518.6835365049 | 1.465      | 0.1797            | -0.0681 | 0.3236  | 0.005      |
| 13    | -518.6770435263 | 1.642      | 0.1975            | -0.0791 | -0.6247 | 0.018      |

|    |                 |       |         |         |        |       |
|----|-----------------|-------|---------|---------|--------|-------|
| 14 | -518.6727348320 | 1.759 | -0.2128 | -0.2458 | 0.1697 | 0.006 |
| 15 | -518.6689278690 | 1.863 | 0.2273  | 0.3263  | 0.0985 | 0.008 |

Table S36. TDDFT excited electronic energy of N-(4-cyanophenethyl)acetamide (**A2**) anion formed by vertical electron attachment at the UB3LYP/6-311++G(2df,p) level.

| STATE | ENERGY          | EXCITATION<br>EV | TRANSITION DIPOLE |         |         | OSCILLATOR<br>STRENGTH |
|-------|-----------------|------------------|-------------------|---------|---------|------------------------|
|       | HARTREE         |                  | X                 | Y       | Z       |                        |
| 0     | -610.9855353685 | 0.000            |                   |         |         |                        |
| 1     | -610.9824770176 | 0.083            | -1.3136           | 1.1139  | 0.7011  | 0.007                  |
| 2     | -610.9720532158 | 0.367            | -0.5262           | -2.2579 | -0.2366 | 0.049                  |
| 3     | -610.9622148667 | 0.635            | 0.5405            | -0.1565 | -1.2647 | 0.030                  |
| 4     | -610.9603393303 | 0.686            | -0.9428           | -0.3548 | 0.1867  | 0.018                  |
| 5     | -610.9581449266 | 0.745            | -2.2175           | -0.5506 | -0.8644 | 0.109                  |
| 6     | -610.9543069157 | 0.850            | -1.1215           | 0.1077  | -0.4053 | 0.030                  |
| 7     | -610.9483798276 | 1.011            | 0.4149            | -0.3052 | 0.0153  | 0.007                  |
| 8     | -610.9439188608 | 1.132            | 0.2320            | 0.2564  | 0.7963  | 0.021                  |
| 9     | -610.9367834740 | 1.327            | -0.2831           | 0.3327  | -0.2024 | 0.008                  |
| 10    | -610.9359509970 | 1.349            | 0.4227            | 0.1100  | -0.2632 | 0.009                  |
| 11    | -610.9260634727 | 1.618            | 0.0592            | -0.1182 | -0.2670 | 0.004                  |
| 12    | -610.9204678488 | 1.771            | -0.2417           | 0.2836  | 0.3123  | 0.010                  |
| 13    | -610.9194577586 | 1.798            | 0.0746            | 0.3411  | -0.0375 | 0.005                  |
| 14    | -610.9076352636 | 2.120            | -0.0785           | -0.2840 | 0.1494  | 0.006                  |
| 15    | -610.9021727642 | 2.268            | -0.0793           | -0.1061 | 0.1271  | 0.002                  |

Table S37. TDDFT excited electronic energy of N-(perfluorophenethyl)acetamide (**A3**) anion formed by vertical electron attachment at the UB3LYP/6-311++G(2df,p) level.

| STATE | ENERGY           | EXCITATION<br>EV | TRANSITION DIPOLE |         |         | OSCILLATOR<br>STRENGTH |
|-------|------------------|------------------|-------------------|---------|---------|------------------------|
|       | HARTREE          |                  | X                 | Y       | Z       |                        |
| 0     | -1014.9366808122 | 0.000            |                   |         |         |                        |
| 1     | -1014.9257760619 | 0.297            | 0.5891            | 0.5706  | 0.4098  | 0.006                  |
| 2     | -1014.9166335438 | 0.546            | 2.1488            | -2.6115 | -1.4670 | 0.182                  |
| 3     | -1014.9139427640 | 0.619            | -0.0066           | 0.0175  | -0.0857 | 0.000                  |
| 4     | -1014.9085170417 | 0.766            | -1.2827           | -1.7908 | 1.8576  | 0.156                  |
| 5     | -1014.9065720470 | 0.819            | -2.2299           | -0.7317 | -1.2237 | 0.141                  |
| 6     | -1014.8975285651 | 1.065            | 0.2661            | -0.8384 | -0.0700 | 0.020                  |
| 7     | -1014.8918283724 | 1.220            | 0.4209            | -0.5670 | 0.1564  | 0.016                  |
| 8     | -1014.8858804100 | 1.382            | 0.3075            | -0.7329 | 0.7372  | 0.040                  |
| 9     | -1014.8833157538 | 1.452            | -0.4380           | -0.6170 | -0.7369 | 0.040                  |
| 10    | -1014.8756732636 | 1.660            | 0.1322            | 0.2585  | -0.5429 | 0.015                  |
| 11    | -1014.8696438349 | 1.824            | 0.3613            | 0.2021  | -0.1826 | 0.009                  |
| 12    | -1014.8665418526 | 1.909            | -0.2040           | 0.2403  | -0.0447 | 0.005                  |
| 13    | -1014.8588077281 | 2.119            | 0.6424            | 0.1577  | 0.3342  | 0.029                  |
| 14    | -1014.8551500453 | 2.219            | -0.1702           | 0.3259  | 0.5925  | 0.026                  |
| 15    | -1014.8490032489 | 2.386            | -0.2755           | -0.0331 | 0.4144  | 0.015                  |

Table S38. TDDFT excited electronic energy of N-(3,5-dicyanophenethyl)acetamide (**A4**) anion formed by vertical electron attachment at the UB3LYP/6-311++G(2df,p) level.

| STATE | ENERGY          | EXCITATION<br>EV | TRANSITION DIPOLE |   |   | OSCILLATOR<br>STRENGTH |
|-------|-----------------|------------------|-------------------|---|---|------------------------|
|       | HARTREE         |                  | X                 | Y | Z |                        |
| 0     | -703.2366543280 | 0.000            |                   |   |   |                        |

|    |                 |       |         |         |         |       |
|----|-----------------|-------|---------|---------|---------|-------|
| 1  | -703.2201542153 | 0.449 | -0.3254 | 0.4049  | -0.0404 | 0.003 |
| 2  | -703.2173477636 | 0.525 | -0.1237 | -0.2501 | 0.2043  | 0.002 |
| 3  | -703.2031132834 | 0.913 | 0.2768  | -0.3694 | -0.1116 | 0.005 |
| 4  | -703.1940035023 | 1.161 | 0.2117  | 0.1238  | -0.1004 | 0.002 |
| 5  | -703.1924281046 | 1.203 | 0.0131  | 0.2545  | 0.0239  | 0.002 |
| 6  | -703.1832620986 | 1.453 | -0.0498 | 0.1409  | 0.0522  | 0.001 |
| 7  | -703.1747298621 | 1.685 | 0.0050  | -0.0357 | 0.2497  | 0.003 |
| 8  | -703.1732436486 | 1.725 | -0.0388 | -0.3753 | 0.1979  | 0.008 |
| 9  | -703.1667814467 | 1.901 | 0.0974  | 0.0730  | -0.0294 | 0.001 |
| 10 | -703.1644430317 | 1.965 | -0.0518 | -0.1226 | -0.0885 | 0.001 |
| 11 | -703.1498385186 | 2.362 | -0.0312 | -0.0279 | -0.1504 | 0.001 |
| 12 | -703.1482194941 | 2.406 | 0.2174  | 0.1257  | -0.0953 | 0.004 |
| 13 | -703.1475129932 | 2.426 | 0.3141  | 0.0633  | 0.2236  | 0.009 |
| 14 | -703.1456428870 | 2.477 | 0.0405  | -0.0841 | 0.0954  | 0.001 |
| 15 | -703.1401663313 | 2.626 | 0.2028  | 0.2895  | -0.0225 | 0.008 |

Table S39. TDDFT excited electronic energy of N-(3-nitrophenethyl)acetamide (**A5**) anion formed by vertical electron attachment at the UB3LYP/6-311++G(2df,p) level.

| STATE | ENERGY<br>HARTREE | EXCITATION<br>EV | TRANSITION DIPOLE |         |         | OSCILLATOR<br>STRENGTH |
|-------|-------------------|------------------|-------------------|---------|---------|------------------------|
|       |                   |                  | X                 | Y       | Z       |                        |
| 0     | -723.2773869793   | 0.000            |                   |         |         |                        |
| 1     | -723.2645522461   | 0.349            | -0.1986           | 0.2486  | -1.3763 | 0.017                  |
| 2     | -723.2523457567   | 0.681            | 0.5554            | 0.6996  | -0.1447 | 0.014                  |
| 3     | -723.2399450923   | 1.019            | 0.3889            | -0.1321 | -0.0149 | 0.004                  |
| 4     | -723.2345116157   | 1.167            | -0.1690           | -0.0150 | -0.1137 | 0.001                  |
| 5     | -723.2276808787   | 1.353            | -0.0123           | 0.0545  | 0.3275  | 0.004                  |
| 6     | -723.2265442194   | 1.384            | 0.0175            | -0.0620 | 0.0073  | 0.000                  |
| 7     | -723.2204709816   | 1.549            | 0.2057            | 0.3124  | 0.1260  | 0.006                  |
| 8     | -723.2174385948   | 1.631            | -0.0450           | -0.2439 | -0.1374 | 0.003                  |
| 9     | -723.2077818267   | 1.894            | -0.0658           | 0.0542  | 0.2324  | 0.003                  |
| 10    | -723.2016735085   | 2.060            | 0.3134            | 0.2655  | 0.1910  | 0.010                  |
| 11    | -723.1987641906   | 2.139            | 0.5300            | -0.0908 | 0.3637  | 0.022                  |
| 12    | -723.1936144342   | 2.280            | 0.2576            | 0.0836  | 0.0483  | 0.004                  |
| 13    | -723.1885632539   | 2.417            | -1.1538           | -0.0889 | -0.4474 | 0.091                  |
| 14    | -723.1864222846   | 2.475            | 0.3962            | 0.1491  | 0.1314  | 0.012                  |
| 15    | -723.1804578318   | 2.638            | -0.1203           | 0.0460  | -0.0460 | 0.001                  |

Table S40. TDDFT excited electronic energy of N-(3,5-dinitrophenethyl)acetamide (**A6**) anion formed by vertical electron attachment at the UB3LYP/6-311++G(2df,p) level.

| STATE | ENERGY<br>HARTREE | EXCITATION<br>EV | TRANSITION DIPOLE |         |         | OSCILLATOR<br>STRENGTH |
|-------|-------------------|------------------|-------------------|---------|---------|------------------------|
|       |                   |                  | X                 | Y       | Z       |                        |
| 0     | -927.7954117827   | 0.000            |                   |         |         |                        |
| 1     | -927.7745218484   | 0.568            | -0.3398           | 1.0964  | 0.6657  | 0.025                  |
| 2     | -927.7590731111   | 0.989            | 0.3152            | -0.1092 | -0.1284 | 0.003                  |
| 3     | -927.7420469770   | 1.452            | 0.1011            | 0.5088  | 0.2080  | 0.011                  |
| 4     | -927.7277582160   | 1.841            | 0.0729            | -0.1863 | -0.0048 | 0.002                  |
| 5     | -927.7232058279   | 1.965            | -0.0766           | 0.0967  | -0.0050 | 0.001                  |
| 6     | -927.7192889191   | 2.071            | -0.2660           | 0.6152  | 0.4559  | 0.033                  |
| 7     | -927.7111656644   | 2.292            | 0.2360            | -0.5615 | -0.2431 | 0.024                  |
| 8     | -927.7048995067   | 2.463            | 0.0955            | -0.0357 | 0.3495  | 0.008                  |
| 9     | -927.7018413502   | 2.546            | -0.0415           | 0.0205  | 0.1203  | 0.001                  |
| 10    | -927.6943602756   | 2.750            | 0.2958            | -0.1968 | 0.2916  | 0.014                  |
| 11    | -927.6916974798   | 2.822            | 0.1223            | -0.0086 | 0.1093  | 0.002                  |

|    |                 |       |         |         |         |       |
|----|-----------------|-------|---------|---------|---------|-------|
| 12 | -927.6892491507 | 2.889 | -0.6173 | -0.0434 | -0.2965 | 0.033 |
| 13 | -927.6824071979 | 3.075 | -0.0109 | 0.0196  | 0.1213  | 0.001 |
| 14 | -927.6779236705 | 3.197 | -0.1594 | -0.0860 | 0.0603  | 0.003 |
| 15 | -927.6710301665 | 3.385 | -0.0172 | -0.1063 | -0.0304 | 0.001 |

Table S41. TDDFT excited electronic energy of N-phenethylacetamide with the methyl ammonium complex radical (**B1**) neutral formed by vertical electron attachment at the UB3LYP/6-311++G(2df,p) level.

| STATE | ENERGY          | EXCITATION<br>EV | TRANSITION DIPOLE |         |         | OSCILLATOR<br>STRENGTH |
|-------|-----------------|------------------|-------------------|---------|---------|------------------------|
|       | HARTREE         |                  | X                 | Y       | Z       |                        |
| 0     | -615.1001801202 | 0.000            |                   |         |         |                        |
| 1     | -615.0897829565 | 0.283            | 0.2374            | 0.2996  | -0.0323 | 0.001                  |
| 2     | -615.0889133250 | 0.307            | 1.0093            | -0.4487 | -0.0978 | 0.009                  |
| 3     | -615.0812095836 | 0.516            | 0.4768            | -0.1612 | -0.8020 | 0.011                  |
| 4     | -615.0721650165 | 0.762            | 2.6176            | 0.0961  | 0.4581  | 0.132                  |
| 5     | -615.0674953715 | 0.889            | -0.2701           | -1.9758 | 0.0488  | 0.087                  |
| 6     | -615.0608421418 | 1.070            | -0.0601           | 0.1949  | 2.5897  | 0.177                  |
| 7     | -615.0569820291 | 1.175            | 1.4061            | -0.2196 | 0.1813  | 0.059                  |
| 8     | -615.0557705581 | 1.208            | -0.6710           | -0.4047 | 0.3499  | 0.022                  |
| 9     | -615.0515452134 | 1.323            | 0.3625            | -0.2431 | -1.0171 | 0.040                  |
| 10    | -615.0422699943 | 1.576            | 0.9837            | -0.2552 | 0.1815  | 0.041                  |
| 11    | -615.0389766847 | 1.665            | -0.0931           | 0.8037  | 0.0478  | 0.027                  |
| 12    | -615.0370452553 | 1.718            | -0.0464           | -0.1201 | 0.2990  | 0.004                  |
| 13    | -615.0341001723 | 1.798            | 0.0572            | -0.5017 | 0.2350  | 0.014                  |
| 14    | -615.0300945863 | 1.907            | -0.0052           | 0.1834  | 0.1239  | 0.002                  |
| 15    | -615.0268457562 | 1.996            | -0.2419           | 0.4110  | -0.1665 | 0.012                  |

Table S42. TDDFT excited electronic energy of N-(4-cyanophenethyl)acetamide with the methyl ammonium complex radical (**B2**) neutral formed by vertical electron attachment at the UB3LYP/6-311++G(2df,p) level.

| STATE | ENERGY          | EXCITATION<br>EV | TRANSITION DIPOLE |         |         | OSCILLATOR<br>STRENGTH |
|-------|-----------------|------------------|-------------------|---------|---------|------------------------|
|       | HARTREE         |                  | X                 | Y       | Z       |                        |
| 0     | -707.3315976629 | 0.000            |                   |         |         |                        |
| 1     | -707.3238232489 | 0.212            | 2.4227            | -0.7612 | 0.0505  | 0.033                  |
| 2     | -707.3116357206 | 0.543            | 0.8807            | -0.0620 | -0.3531 | 0.012                  |
| 3     | -707.3063984978 | 0.686            | 0.3071            | -0.0889 | -0.7227 | 0.010                  |
| 4     | -707.2956994202 | 0.977            | -2.2057           | -0.6903 | -0.6499 | 0.138                  |
| 5     | -707.2938832073 | 1.026            | -0.5420           | 1.4451  | 0.0365  | 0.060                  |
| 6     | -707.2898785992 | 1.135            | -0.3529           | -0.2533 | 2.3709  | 0.162                  |
| 7     | -707.2778315742 | 1.463            | 0.1193            | 0.0144  | -0.0480 | 0.001                  |
| 8     | -707.2752225980 | 1.534            | 1.0360            | -0.1175 | 0.1739  | 0.042                  |
| 9     | -707.2746630776 | 1.549            | 0.1449            | -0.0355 | -0.1460 | 0.002                  |
| 10    | -707.2633946988 | 1.856            | -0.4615           | 0.7426  | 0.0375  | 0.035                  |
| 11    | -707.2579448101 | 2.004            | -0.1807           | -0.3426 | 0.0698  | 0.008                  |
| 12    | -707.2557173299 | 2.065            | -0.3252           | 0.0922  | -0.0789 | 0.006                  |
| 13    | -707.2515720454 | 2.178            | 0.0158            | -0.2440 | -0.0394 | 0.003                  |
| 14    | -707.2498031228 | 2.226            | 0.2568            | -0.0884 | 0.0533  | 0.004                  |
| 15    | -707.2462803368 | 2.322            | -0.1559           | 0.1781  | 0.1104  | 0.004                  |

Table S43. TDDFT excited electronic energy of N-(perfluorophenethyl)acetamide with the methyl ammonium complex radical (**B3**) neutral formed by vertical electron attachment at the UB3LYP/6-311++G(2df,p) level.

| STATE | ENERGY           | EXCITATION | TRANSITION DIPOLE |         |         | OSCILLATOR |
|-------|------------------|------------|-------------------|---------|---------|------------|
|       | HARTREE          |            | EV                | X       | Y       |            |
| 0     | -1111.2865533885 | 0.000      |                   |         |         |            |
| 1     | -1111.2761603396 | 0.283      | -1.2550           | 0.5016  | 0.3062  | 0.013      |
| 2     | -1111.2708815307 | 0.426      | 2.2405            | -0.5814 | -0.0277 | 0.056      |
| 3     | -1111.2695672576 | 0.462      | 1.4414            | -0.1966 | -0.3600 | 0.025      |
| 4     | -1111.2636633302 | 0.623      | 0.6723            | 0.1348  | -0.6059 | 0.013      |
| 5     | -1111.2512189747 | 0.961      | 1.1015            | 2.0287  | -0.1538 | 0.126      |
| 6     | -1111.2469075195 | 1.079      | -0.0283           | -0.2268 | -2.3511 | 0.147      |
| 7     | -1111.2439611647 | 1.159      | -1.3087           | 0.1914  | -1.3732 | 0.103      |
| 8     | -1111.2368196696 | 1.353      | -0.0634           | -0.1451 | -0.2347 | 0.003      |
| 9     | -1111.2358114483 | 1.381      | 1.0290            | 0.1302  | -0.4999 | 0.045      |
| 10    | -1111.2211548476 | 1.780      | 0.6408            | -0.6455 | -0.1282 | 0.037      |
| 11    | -1111.2172457472 | 1.886      | -0.0316           | -0.1607 | -0.2244 | 0.004      |
| 12    | -1111.2152952896 | 1.939      | -0.3523           | 0.1031  | -0.1003 | 0.007      |
| 13    | -1111.2111719760 | 2.051      | -0.0586           | -0.0796 | -0.0564 | 0.001      |
| 14    | -1111.2083557839 | 2.128      | -0.4881           | -0.2221 | 0.2735  | 0.019      |
| 15    | -1111.2021262978 | 2.297      | -0.1062           | 0.2849  | -0.0405 | 0.005      |

Table S44. TDDFT excited electronic energy of N-(3,5-dicyanophenethyl)acetamide with the methyl ammonium complex radical (**B4**) neutral formed by vertical electron attachment at the UB3LYP/6-311++G(2df,p) level.

| STATE | ENERGY          | EXCITATION | TRANSITION DIPOLE |         |         | OSCILLATOR |
|-------|-----------------|------------|-------------------|---------|---------|------------|
|       | HARTREE         |            | EV                | X       | Y       |            |
| 0     | -799.5629746952 | 0.000      |                   |         |         |            |
| 1     | -799.5555592043 | 0.202      | 2.5892            | -0.6567 | 0.0779  | 0.035      |
| 2     | -799.5444182005 | 0.505      | -0.5560           | 0.0035  | 0.0897  | 0.004      |
| 3     | -799.5338589899 | 0.792      | -0.0102           | 0.2543  | -0.8078 | 0.014      |
| 4     | -799.5236112629 | 1.071      | 0.6960            | 1.1817  | 1.2461  | 0.090      |
| 5     | -799.5201163227 | 1.166      | -0.0062           | 0.6234  | -1.3547 | 0.064      |
| 6     | -799.5179079936 | 1.226      | 1.4462            | -0.3001 | -0.5434 | 0.074      |
| 7     | -799.5013630139 | 1.677      | -0.7666           | 0.4108  | -0.1730 | 0.032      |
| 8     | -799.4970744340 | 1.793      | 0.5690            | -0.0817 | -0.0429 | 0.015      |
| 9     | -799.4926070580 | 1.915      | -0.1118           | -0.2825 | -0.0444 | 0.004      |
| 10    | -799.4862289236 | 2.088      | -0.1236           | 0.6177  | -0.2132 | 0.023      |
| 11    | -799.4797908445 | 2.264      | 0.0690            | 0.0229  | 0.0770  | 0.001      |
| 12    | -799.4761851487 | 2.362      | 0.1500            | 0.3197  | -0.1946 | 0.009      |
| 13    | -799.4739148342 | 2.423      | -0.1241           | -0.2599 | 0.1191  | 0.006      |
| 14    | -799.4647145127 | 2.674      | -0.0151           | -0.0166 | 0.0445  | 0.000      |
| 15    | -799.4642673610 | 2.686      | 0.3050            | -0.2605 | 0.0554  | 0.011      |

Table S45. TDDFT excited electronic energy of N-(3-nitrophenethyl)acetamide with the methyl ammonium complex radical (**B5**) neutral formed by vertical electron attachment at the UB3LYP/6-311++G(2df,p) level.

| STATE | ENERGY  | EXCITATION | TRANSITION DIPOLE |   |   | OSCILLATOR |
|-------|---------|------------|-------------------|---|---|------------|
|       | HARTREE |            | EV                | X | Y |            |

|    |                 |       |         |         |         |       |
|----|-----------------|-------|---------|---------|---------|-------|
| 0  | -819.6116288709 | 0.000 |         |         |         |       |
| 1  | -819.6027943565 | 0.240 | 2.6131  | -0.9538 | 0.2823  | 0.046 |
| 2  | -819.5801846901 | 0.856 | -0.2116 | -0.2129 | 0.8747  | 0.018 |
| 3  | -819.5723645826 | 1.068 | 0.4597  | 0.8915  | 1.2815  | 0.069 |
| 4  | -819.5686388760 | 1.170 | -0.5240 | -0.5076 | 1.2668  | 0.061 |
| 5  | -819.5654806346 | 1.256 | -1.0592 | 0.2709  | -0.4496 | 0.043 |
| 6  | -819.5612309422 | 1.371 | -0.9262 | 0.5240  | 0.1677  | 0.039 |
| 7  | -819.5434034822 | 1.857 | -0.3369 | 0.6830  | -0.0248 | 0.026 |
| 8  | -819.5428236248 | 1.872 | -0.4238 | 0.0404  | -0.1128 | 0.009 |
| 9  | -819.5386267677 | 1.986 | 0.0493  | -0.1401 | 0.0263  | 0.001 |
| 10 | -819.5297966109 | 2.227 | -0.2749 | -0.6314 | 0.1878  | 0.028 |
| 11 | -819.5281584903 | 2.271 | -0.6272 | -0.7573 | -0.0463 | 0.054 |
| 12 | -819.5249106241 | 2.360 | 0.1229  | 0.2875  | -0.1039 | 0.006 |
| 13 | -819.5242854614 | 2.377 | -0.3717 | -0.2790 | 0.0822  | 0.013 |
| 14 | -819.5204570028 | 2.481 | -0.0658 | -0.0950 | 0.0026  | 0.001 |
| 15 | -819.5117185812 | 2.719 | 0.1106  | -0.5287 | -0.0175 | 0.019 |

Table S46. TDDFT excited electronic energy of N-(3,5-dicyanophenethyl)acetamide with the methyl ammonium complex radical (**C4**) neutral formed by vertical electron attachment at the UB3LYP/6-311++G(2df,p) level.

| STATE | ENERGY<br>HARTREE | EXCITATION<br>EV | TRANSITION DIPOLE |         |         | OSCILLATOR<br>STRENGTH |
|-------|-------------------|------------------|-------------------|---------|---------|------------------------|
|       |                   |                  | X                 | Y       | Z       |                        |
| 0     | -799.5639059153   | 0.000            |                   |         |         |                        |
| 1     | -799.5589753445   | 0.134            | 1.6155            | -0.8795 | 0.0280  | 0.011                  |
| 2     | -799.5402132011   | 0.645            | -0.4509           | 0.2177  | 0.0610  | 0.004                  |
| 3     | -799.5239300314   | 1.088            | 0.7887            | 0.5165  | 0.7397  | 0.038                  |
| 4     | -799.5228449579   | 1.117            | -0.8401           | -0.2415 | 1.4902  | 0.082                  |
| 5     | -799.5091167354   | 1.491            | 0.6258            | -0.4752 | 0.0549  | 0.023                  |
| 6     | -799.5035114829   | 1.643            | 0.9043            | -0.7276 | 0.0988  | 0.055                  |
| 7     | -799.4963643314   | 1.838            | -0.3922           | 0.0154  | -0.0671 | 0.007                  |
| 8     | -799.4898834495   | 2.014            | -0.3106           | 0.2449  | -0.1083 | 0.008                  |
| 9     | -799.4855724953   | 2.132            | 0.2679            | 0.2753  | 0.0813  | 0.008                  |
| 10    | -799.4818805471   | 2.232            | -0.2518           | -0.0073 | 0.0744  | 0.004                  |
| 11    | -799.4805342591   | 2.269            | 0.5708            | -0.2869 | -0.0410 | 0.023                  |
| 12    | -799.4765947398   | 2.376            | 0.1482            | 0.1224  | 0.0084  | 0.002                  |
| 13    | -799.4707352265   | 2.535            | 0.6040            | 0.4548  | 0.0553  | 0.036                  |
| 14    | -799.4660053484   | 2.664            | 0.1565            | -0.2652 | -0.0838 | 0.007                  |
| 15    | -799.4647212398   | 2.699            | 0.2015            | -0.2728 | 0.1001  | 0.008                  |

Table S47. TDDFT excited electronic energy of N-(3-nitrophenethyl)acetamide with the methyl ammonium complex radical (**C5**) neutral formed by vertical electron attachment at the UB3LYP/6-311++G(2df,p) level.

| STATE | ENERGY<br>HARTREE | EXCITATION<br>EV | TRANSITION DIPOLE |         |         | OSCILLATOR<br>STRENGTH |
|-------|-------------------|------------------|-------------------|---------|---------|------------------------|
|       |                   |                  | X                 | Y       | Z       |                        |
| 0     | -819.6455716552   | 0.000            |                   |         |         |                        |
| 1     | -819.6087854554   | 1.001            | 0.3006            | 0.0420  | -0.1683 | 0.003                  |
| 2     | -819.5752466764   | 1.914            | 0.5720            | 0.2549  | -0.1035 | 0.019                  |
| 3     | -819.5624669976   | 2.261            | -0.0272           | 0.0417  | 0.0926  | 0.001                  |
| 4     | -819.5604469995   | 2.316            | 0.1016            | -0.0758 | -0.0698 | 0.001                  |
| 5     | -819.5557769892   | 2.443            | -0.0754           | 0.2742  | -0.0625 | 0.005                  |

|    |                 |       |         |         |         |       |
|----|-----------------|-------|---------|---------|---------|-------|
| 6  | -819.5484719985 | 2.642 | -0.0411 | 0.1222  | 0.2830  | 0.006 |
| 7  | -819.5437017412 | 2.772 | 0.1187  | 0.1217  | 0.1165  | 0.003 |
| 8  | -819.5383731721 | 2.917 | 0.6354  | 0.2599  | 0.1348  | 0.035 |
| 9  | -819.5337769006 | 3.042 | -0.4507 | -0.1502 | -0.0193 | 0.017 |
| 10 | -819.5327704643 | 3.069 | 0.4527  | 0.1217  | -0.0490 | 0.017 |
| 11 | -819.5280241518 | 3.199 | 0.3943  | 0.1764  | -0.0671 | 0.015 |
| 12 | -819.5259164029 | 3.256 | -0.1791 | -0.2519 | -0.1433 | 0.009 |
| 13 | -819.5193395571 | 3.435 | -0.1360 | -0.0581 | -0.1129 | 0.003 |
| 14 | -819.5187183574 | 3.452 | -0.1126 | -0.0481 | -0.0180 | 0.001 |
| 15 | -819.5140364842 | 3.579 | 0.0403  | -0.0485 | 0.1798  | 0.003 |

Table S48. TDDFT excited electronic energy of N-(3-nitrophenethyl)acetamide with the methyl ammonium complex radical (**D5**) neutral formed by vertical electron attachment at the UB3LYP/6-311++G(2df,p) level.

| STATE | ENERGY          | EXCITATION | TRANSITION DIPOLE |         |         | OSCILLATOR |
|-------|-----------------|------------|-------------------|---------|---------|------------|
|       | HARTREE         |            | EV                | X       | Y       |            |
| 0     | -819.6403232784 | 0.000      |                   |         |         |            |
| 1     | -819.6191136373 | 0.577      | 0.3803            | 0.4337  | 0.3043  | 0.006      |
| 2     | -819.6044371484 | 0.977      | -0.1770           | 0.0930  | -0.0055 | 0.001      |
| 3     | -819.6002815817 | 1.090      | 0.1573            | -0.0490 | -0.0053 | 0.001      |
| 4     | -819.5923777150 | 1.305      | -0.2368           | -0.5611 | -0.0326 | 0.012      |
| 5     | -819.5804108651 | 1.630      | -0.1008           | -0.1008 | -0.0445 | 0.001      |
| 6     | -819.5753801771 | 1.767      | -0.0717           | 0.1245  | -0.1862 | 0.002      |
| 7     | -819.5690161229 | 1.940      | 0.2860            | -0.0697 | -0.2699 | 0.008      |
| 8     | -819.5629378603 | 2.106      | 0.1058            | -0.0317 | 0.2355  | 0.003      |
| 9     | -819.5587803748 | 2.219      | -0.0540           | -0.1260 | -0.0533 | 0.001      |
| 10    | -819.5561031491 | 2.292      | -0.3008           | 0.4687  | 0.0861  | 0.018      |
| 11    | -819.5490614802 | 2.483      | 0.2785            | -0.7375 | -0.2122 | 0.041      |
| 12    | -819.5469011537 | 2.542      | -0.4036           | 0.7183  | 0.1063  | 0.043      |
| 13    | -819.5427963925 | 2.654      | 0.2188            | -0.3705 | 0.1205  | 0.013      |
| 14    | -819.5390537562 | 2.756      | -0.1872           | 0.2856  | -0.0847 | 0.008      |
| 15    | -819.5347162411 | 2.874      | 0.0294            | 0.0891  | -0.1064 | 0.001      |

Table S49. TDDFT excited electronic energy of N-(3,5-dinitrophenethyl)acetamide with the methyl ammonium complex radical (**B6**) neutral formed by vertical electron attachment at the UB3LYP/6-311++G(2df,p) level.

| STATE | ENERGY           | EXCITATION | TRANSITION DIPOLE |         |         | OSCILLATOR |
|-------|------------------|------------|-------------------|---------|---------|------------|
|       | HARTREE          |            | EV                | X       | Y       |            |
| 0     | -1024.1120067160 | 0.000      |                   |         |         |            |
| 1     | -1024.1071969221 | 0.131      | -1.8178           | 0.9795  | -0.3030 | 0.014      |
| 2     | -1024.0912773687 | 0.564      | 0.0943            | 0.8854  | -0.5328 | 0.015      |
| 3     | -1024.0794523913 | 0.886      | 0.3014            | 0.0552  | -0.4991 | 0.007      |
| 4     | -1024.0708269134 | 1.121      | 0.9927            | 1.0084  | -0.1030 | 0.055      |
| 5     | -1024.0670465079 | 1.223      | -0.2300           | -0.1494 | 1.0706  | 0.037      |
| 6     | -1024.0607716299 | 1.394      | 0.7909            | -0.6235 | 0.4000  | 0.040      |
| 7     | -1024.0481955472 | 1.736      | 0.3855            | -0.7313 | 0.4980  | 0.040      |
| 8     | -1024.0413371004 | 1.923      | 0.3152            | 0.2803  | 0.0156  | 0.008      |
| 9     | -1024.0359718620 | 2.069      | -0.3043           | 0.2701  | 0.5149  | 0.022      |
| 10    | -1024.0303388094 | 2.222      | 0.1207            | -0.5760 | 0.1053  | 0.019      |
| 11    | -1024.0228069949 | 2.427      | 0.0055            | -0.4134 | -0.0105 | 0.010      |



|    |                  |       |         |         |        |       |
|----|------------------|-------|---------|---------|--------|-------|
| 12 | -1024.0171377952 | 2.582 | 0.1060  | 0.0799  | 0.0451 | 0.001 |
| 13 | -1024.0129650313 | 2.695 | 0.2843  | -0.0025 | 0.3003 | 0.011 |
| 14 | -1024.0101518237 | 2.772 | -0.3389 | 0.0783  | 0.0639 | 0.008 |
| 15 | -1024.0084435515 | 2.818 | 0.5782  | 0.1766  | 0.0457 | 0.025 |

Figure S3. TDDFT excited molecular orbitals of N-phenethylacetamide (**A1**) anion formed by vertical electron attachment at the UB3LYP/6-31++G(d,p) level.

N-phenethylacetamide w/o  $\text{CH}_3\text{NH}_3$  (**A1**) TD-B3LYP/6-31++G(d,p)

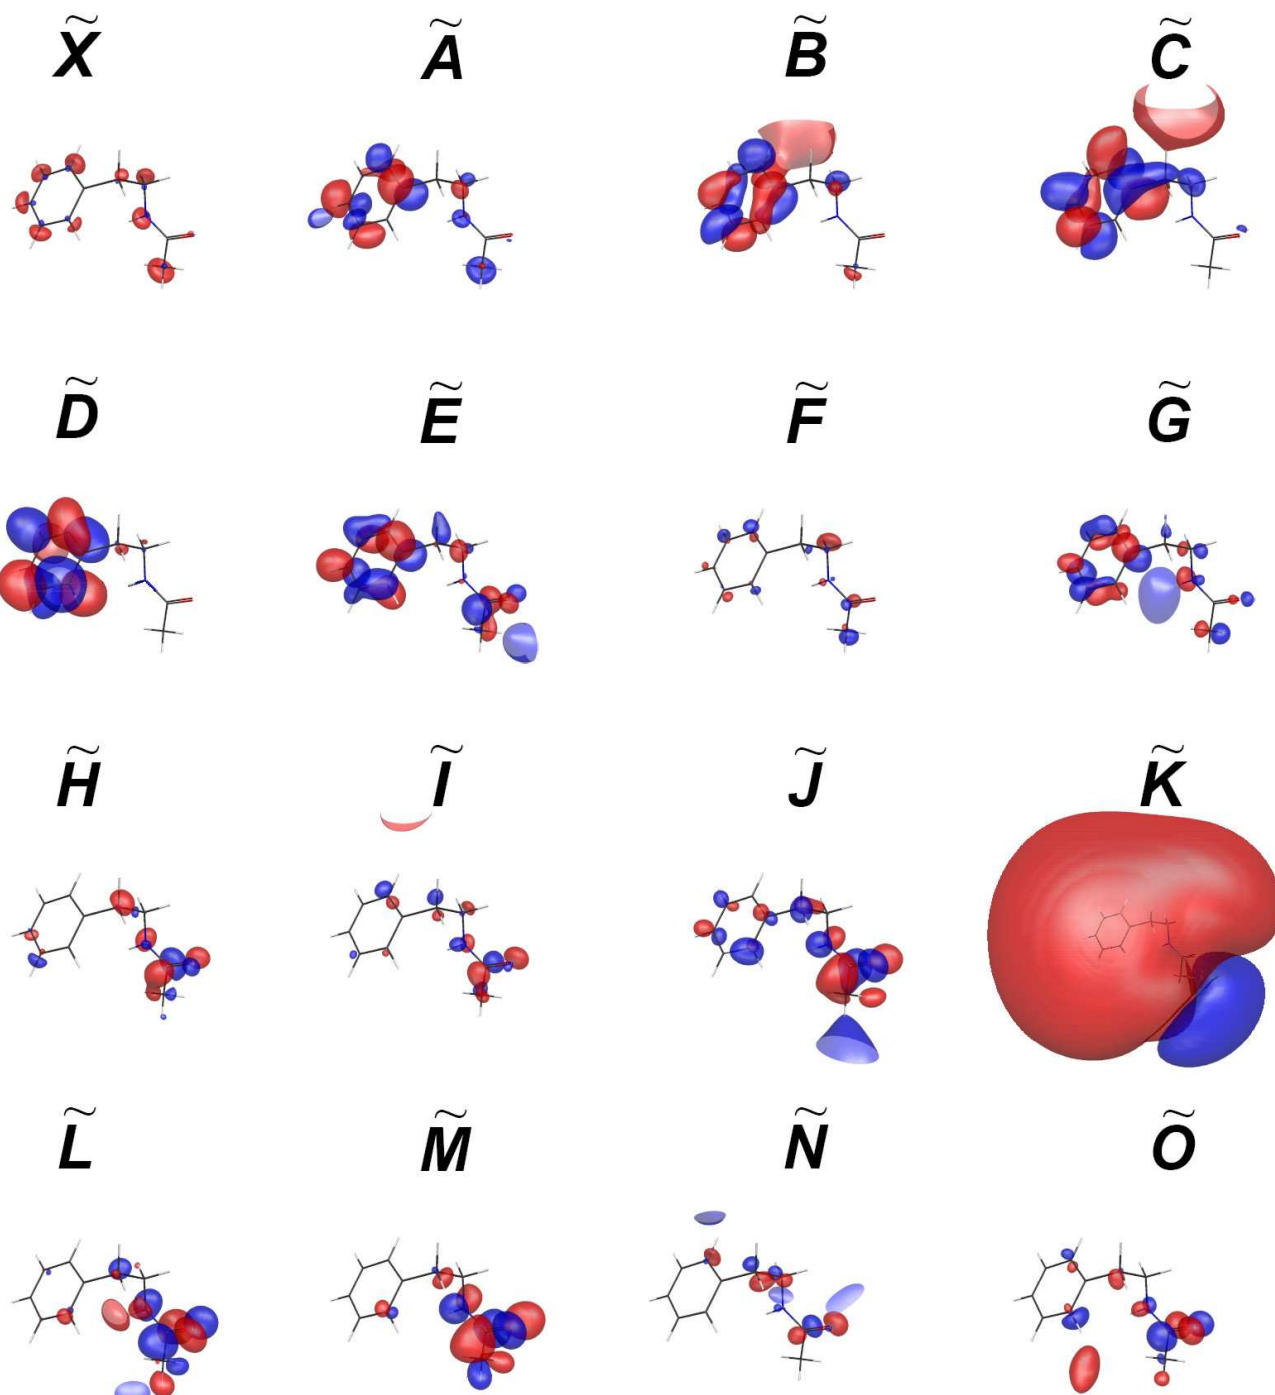

Figure S4. TDDFT excited molecular orbitals of N-(4-cyanophenethyl)acetamide (**A2**) anion formed by vertical electron attachment at the UB3LYP/6-31++G(d,p) level.

N-(4-cyanophenethyl)acetamide w/o  $\text{CH}_3\text{NH}_3$  (**A2**) TD-B3LYP/6-31++G(d,p)

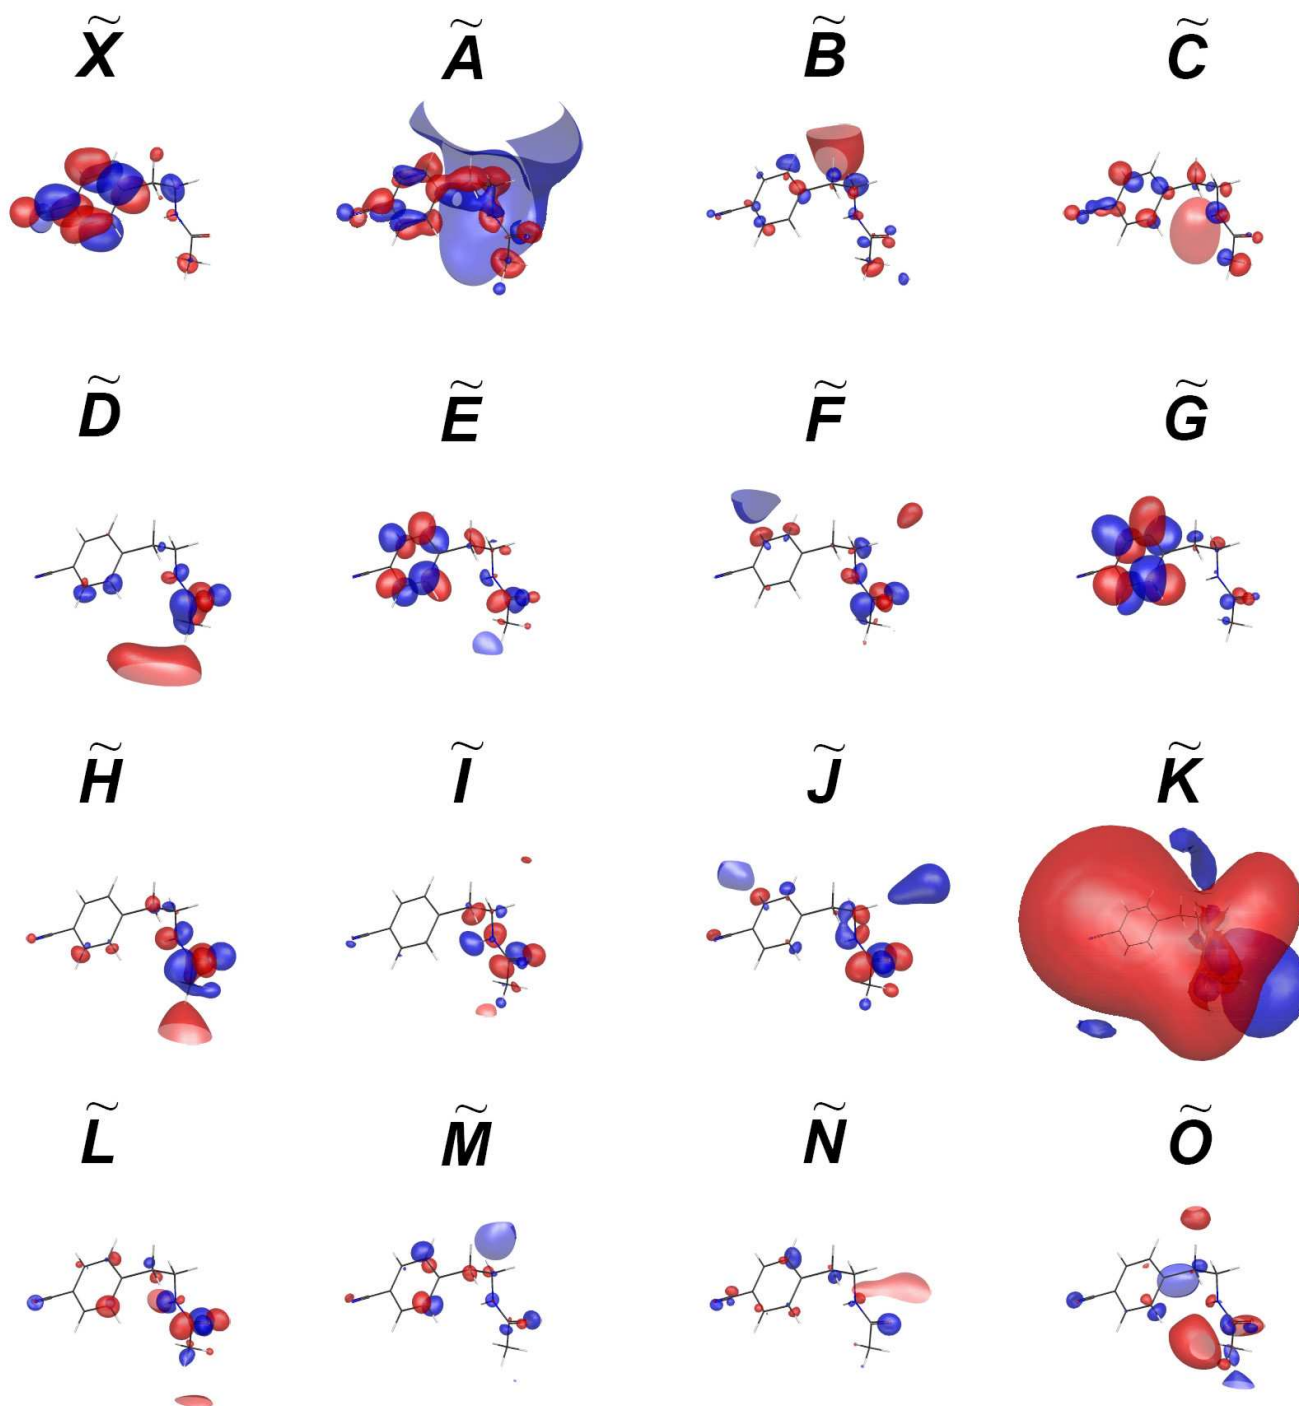

Figure S5. TDDFT excited molecular orbitals of N-(perfluorophenethyl)acetamide (**A3**) anion formed by vertical electron attachment at the UB3LYP/6-31++G(d,p) level.

N-(perfluorophenethyl)acetamide w/o  $\text{CH}_3\text{NH}_3$  (**A3**) TD-B3LYP/6-31++G(d,p)

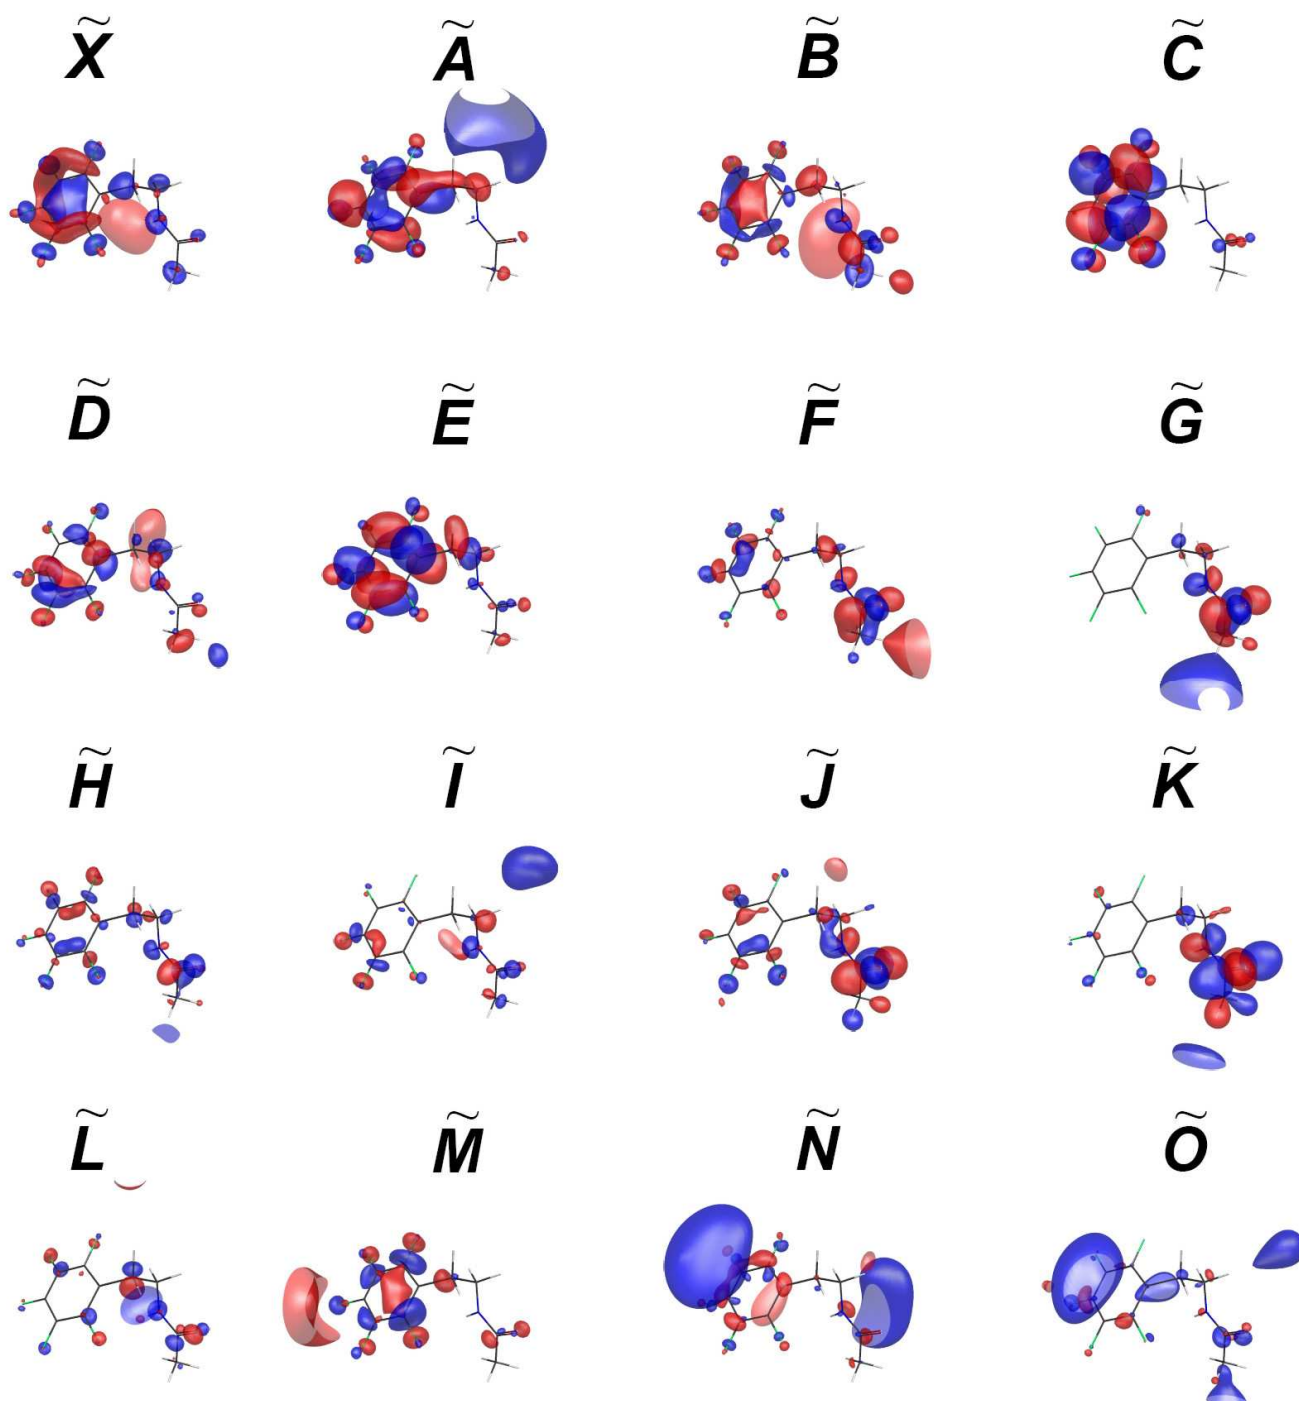

Figure S6. TDDFT excited molecular orbitals of N-(3,5-dicyanophenethyl)acetamide (**A4**) anion formed by vertical electron attachment at the UB3LYP/6-31++G(d,p) level.

N-(3,5-dicyanophenethyl)acetamide w/o  $\text{CH}_3\text{NH}_3$  (**A4**) TD-B3LYP/6-31++G(d,p)

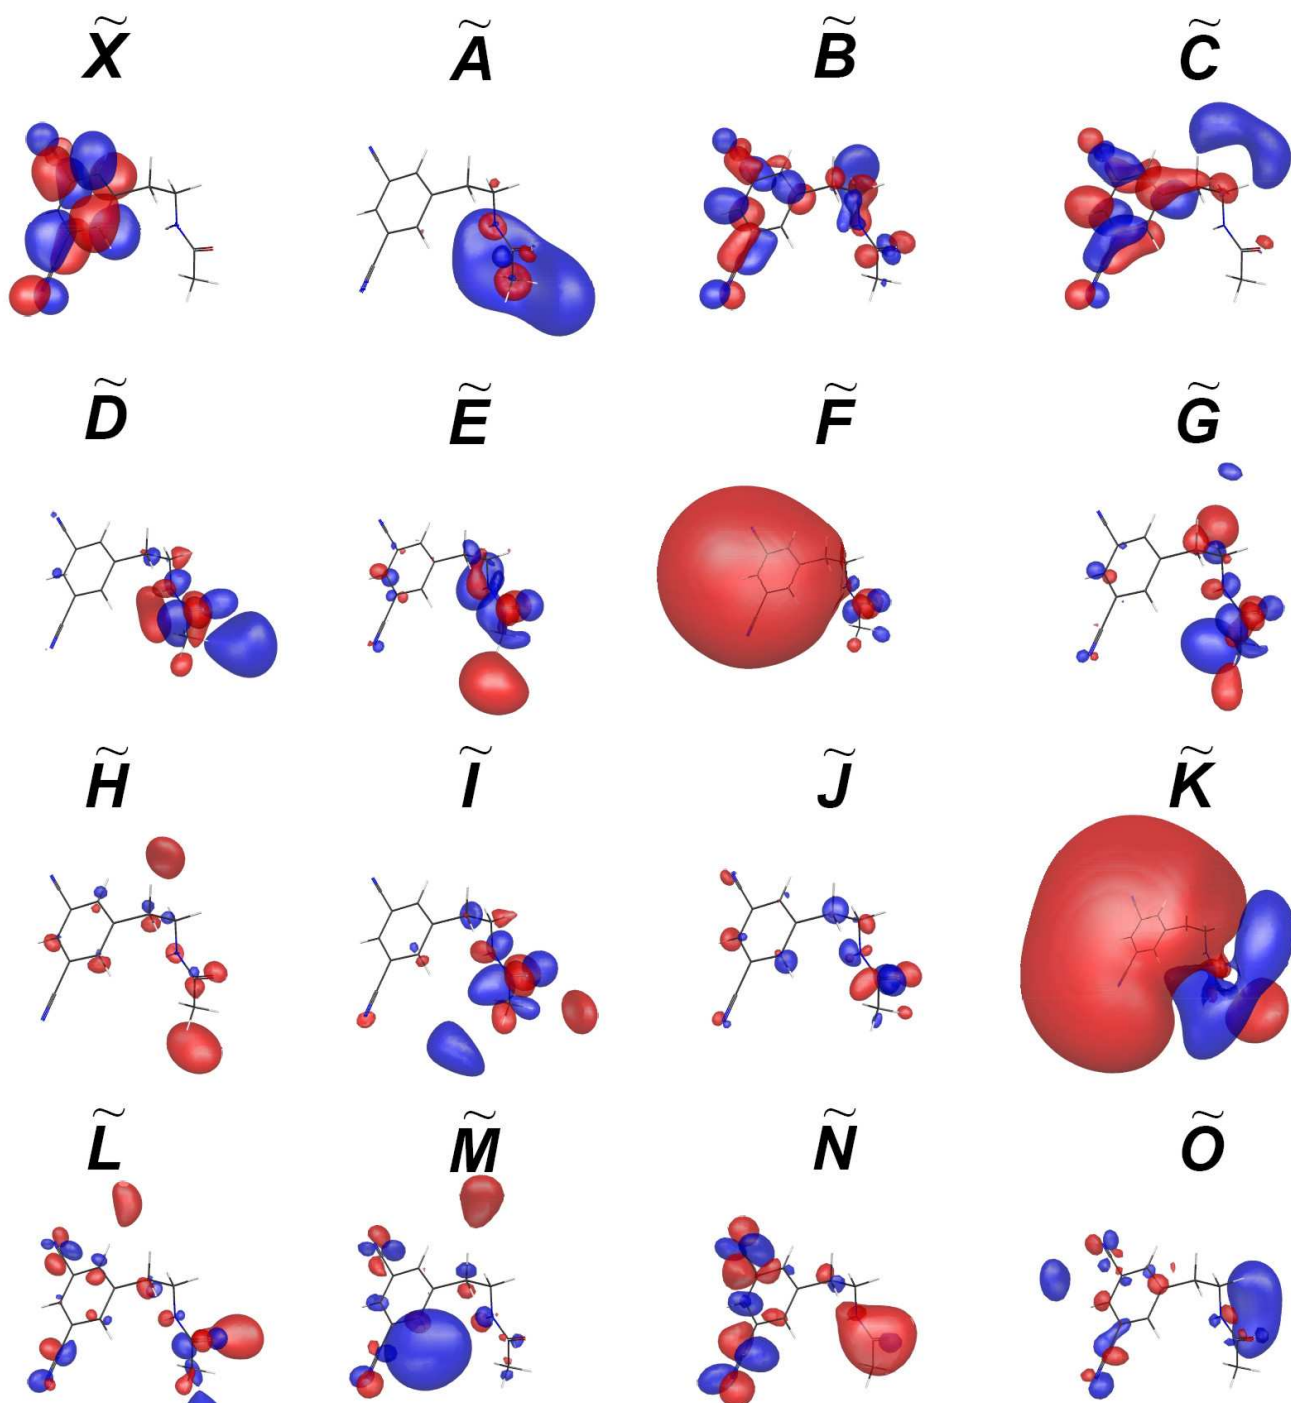

Figure S7. TDDFT excited molecular orbitals of N-(3-nitrophenethyl)acetamide (A5) anion formed by vertical electron attachment at the UB3LYP/6-31++G(d,p) level.

N-(3-nitrophenethyl)acetamide w/o CH<sub>3</sub>NH<sub>3</sub> (A5) TD-B3LYP/6-31++G(d,p)

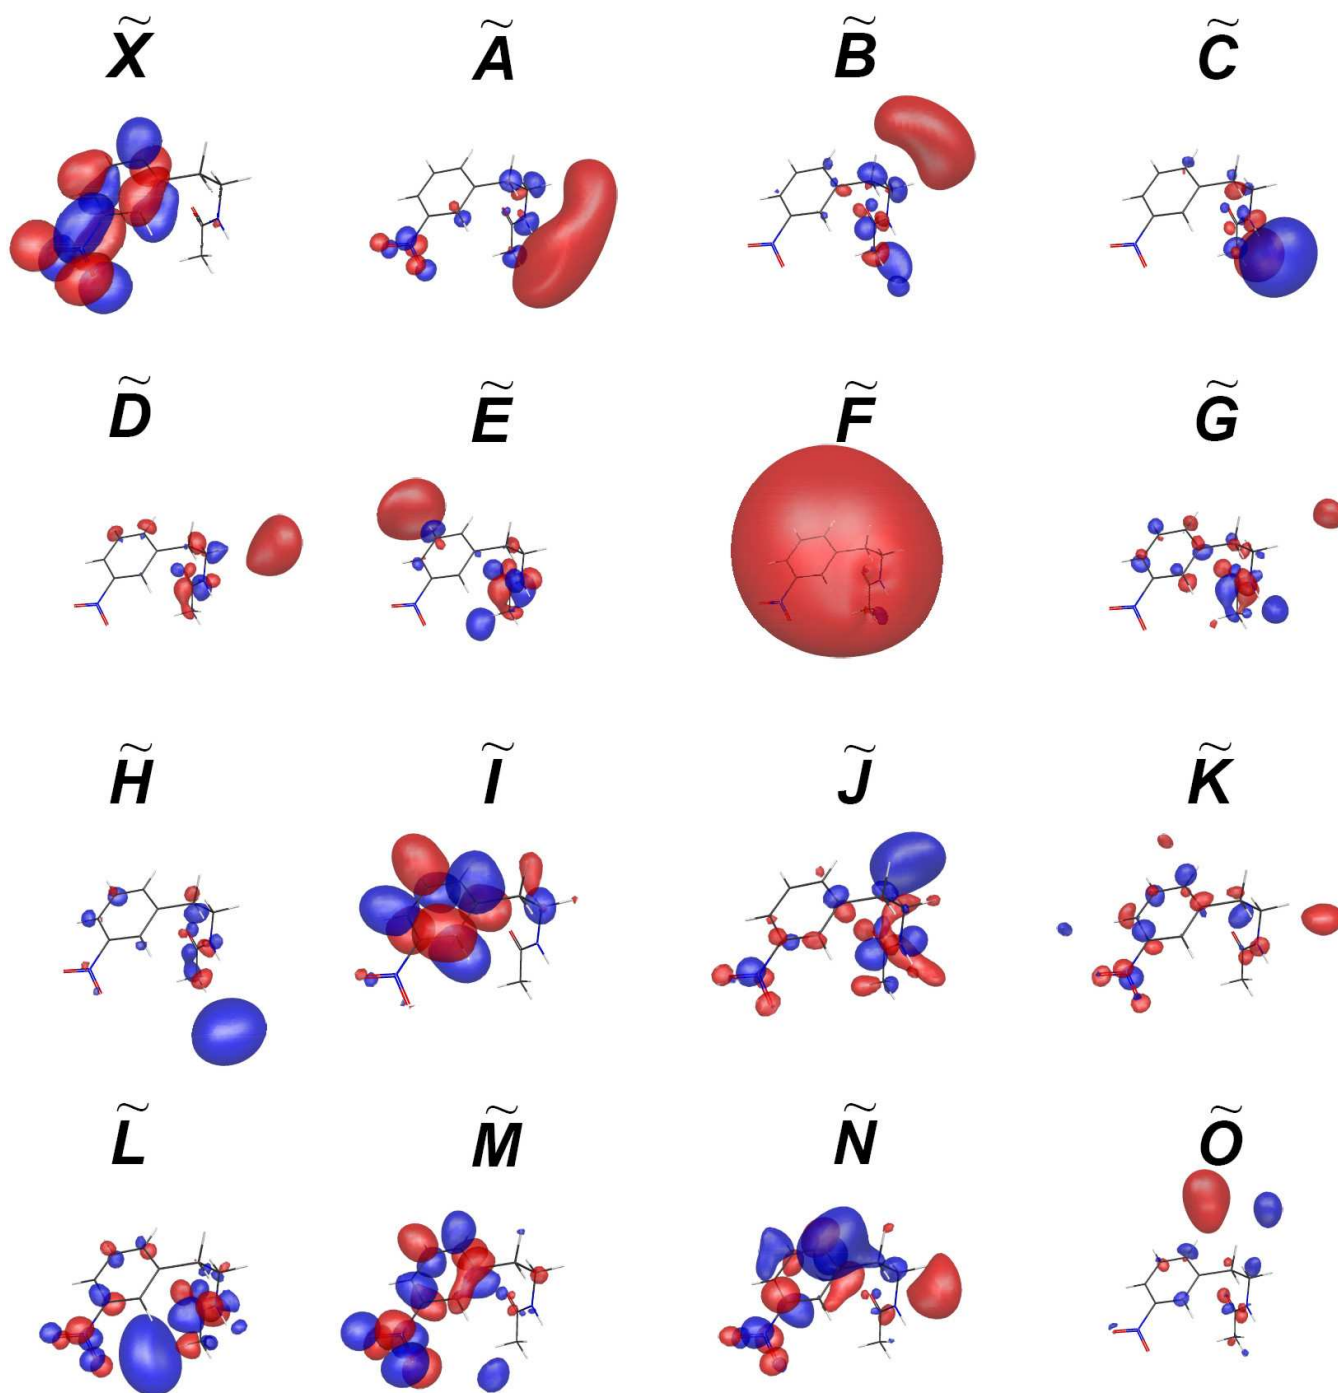

Figure S8. TDDFT excited molecular orbitals of N-(3,5-dinitrophenethyl)acetamide (**A6**) anion formed by vertical electron attachment at the UB3LYP/6-31++G(d,p) level.

N-(3,5-dinitrophenethyl)acetamide w/o  $\text{CH}_3\text{NH}_3$  (**A6**) TD-B3LYP/6-31++G(d,p)

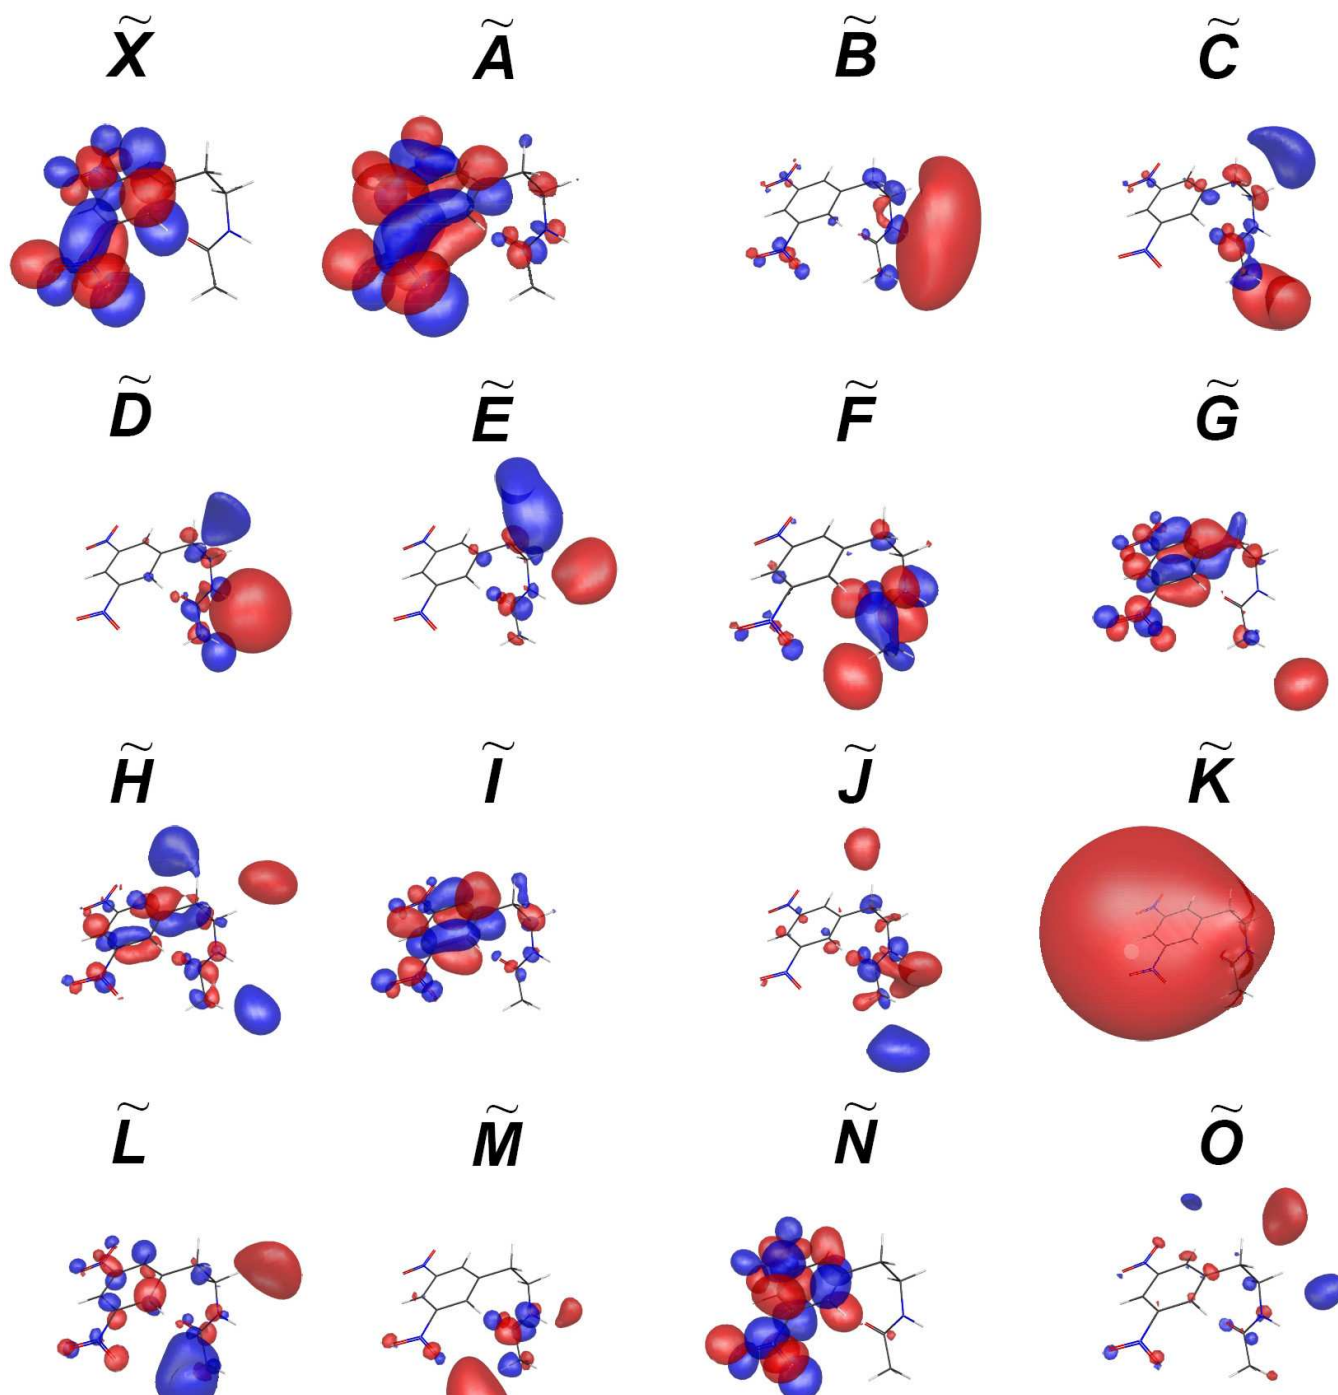

Figure S9. TDDFT excited molecular orbitals of N-phenethylacetamide with the methyl ammonium complex radical (**B1**) neutral formed by vertical electron attachment at the UB3LYP/6-31++G(d,p) level.

N-phenethylacetamide with CH<sub>3</sub>NH<sub>3</sub> (**B1**) TD-B3LYP/6-31++G(d,p)

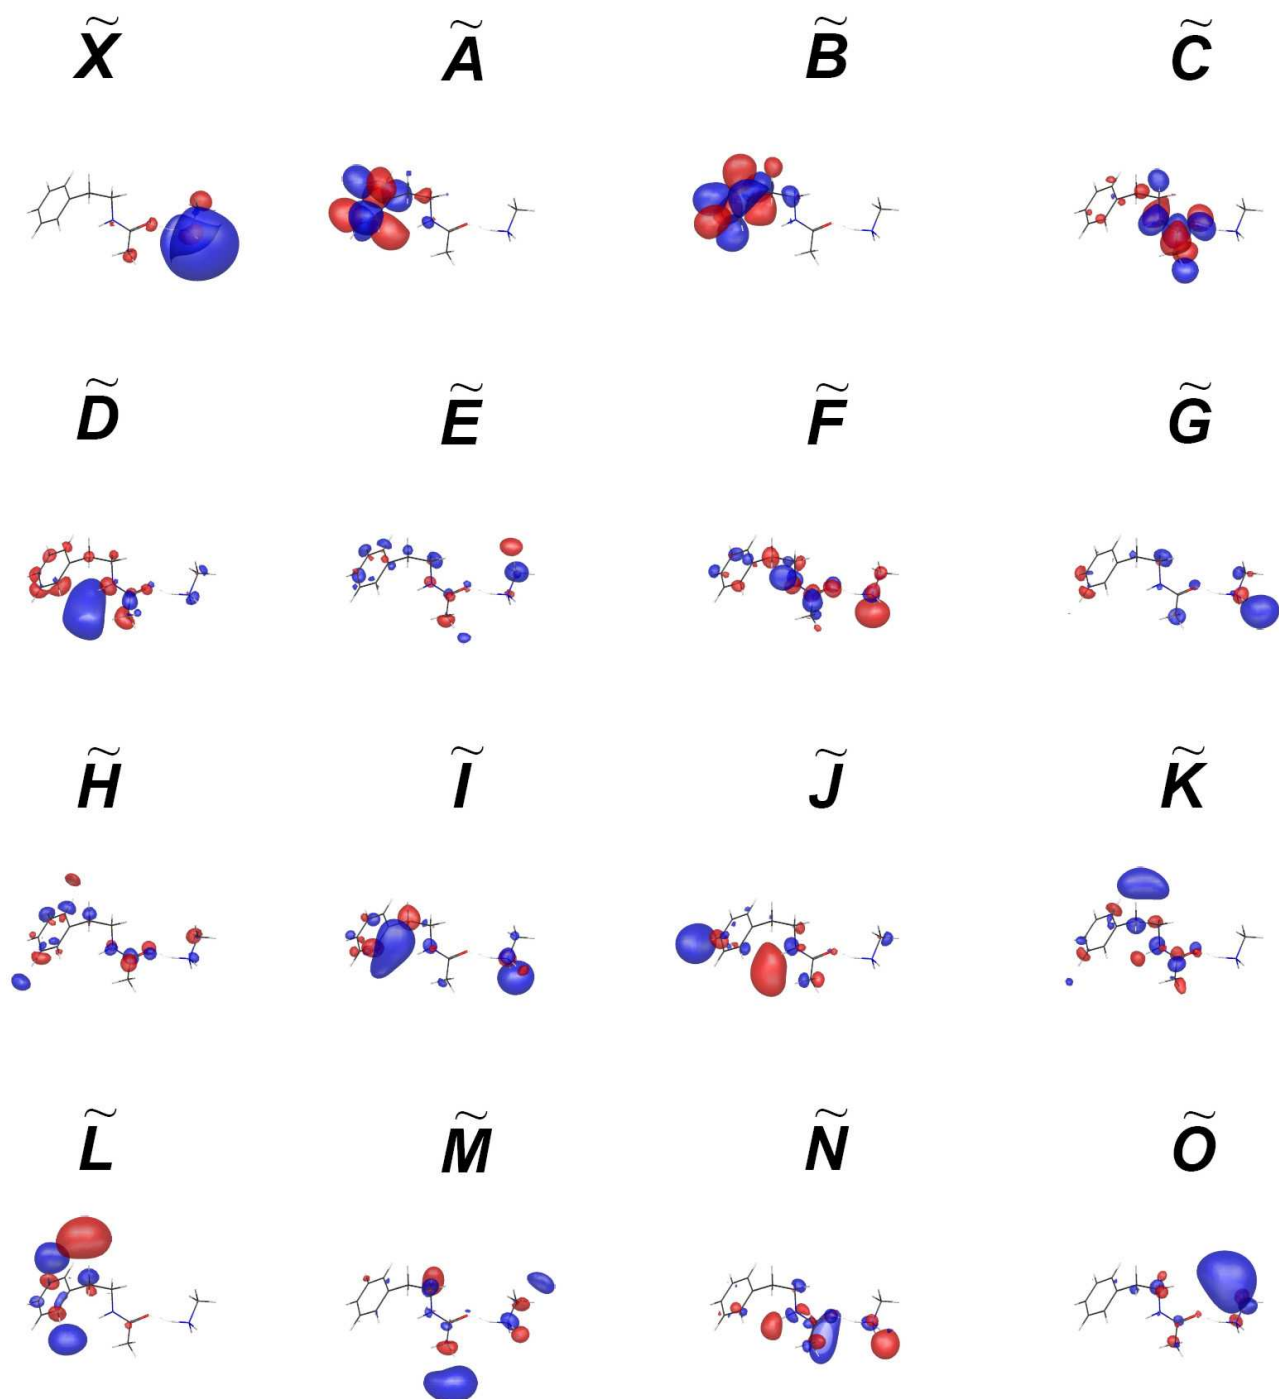

Figure S10. TDDFT excited molecular orbitals of N-(4-cyanophenethyl)acetamide with the methyl ammonium complex radical (**B2**) neutral formed by vertical electron attachment at the UB3LYP/6-31++G(d,p) level.

N-(4-cyanophenethyl)acetamide with CH<sub>3</sub>NH<sub>3</sub> (**B2**) TD-B3LYP/6-31++G(d,p)

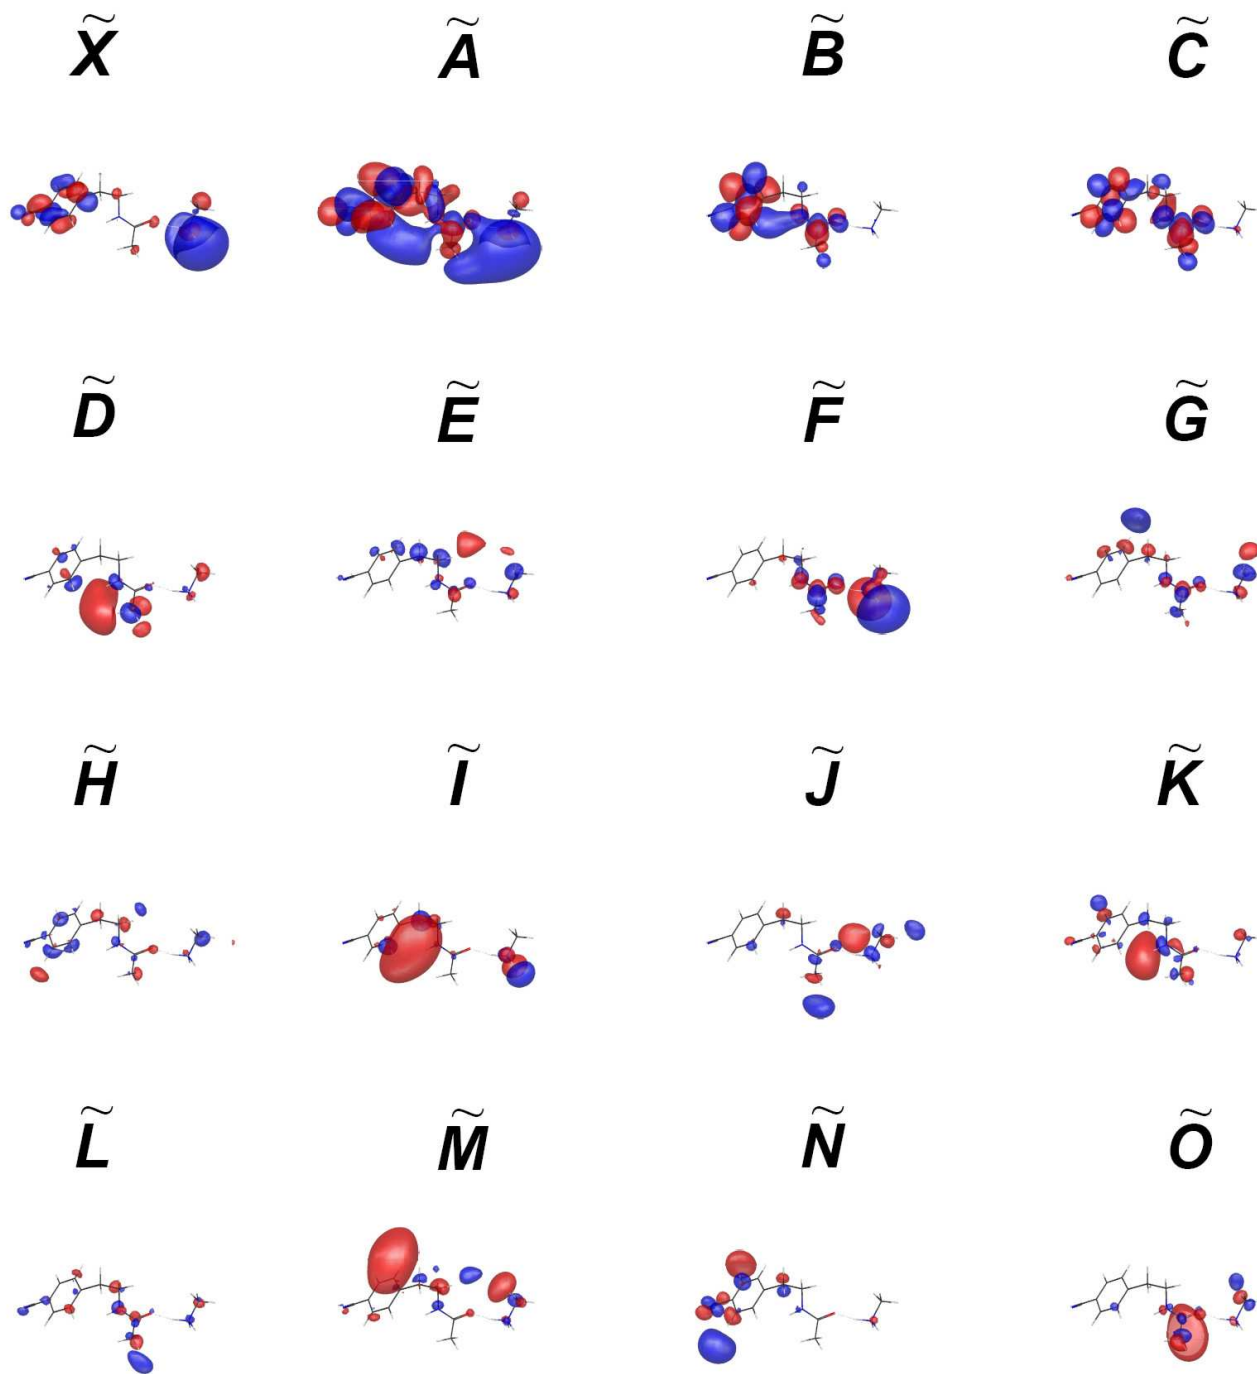



Figure S11. TDDFT excited molecular orbitals of N-(perfluorophenethyl)acetamide with the methyl ammonium complex radical (**B3**) neutral formed by vertical electron attachment at the UB3LYP/6-31++G(d,p) level.

N-(perfluorophenethyl)acetamide with  $\text{CH}_3\text{NH}_3$  (**B3**) TD-B3LYP/6-31++G(d,p)

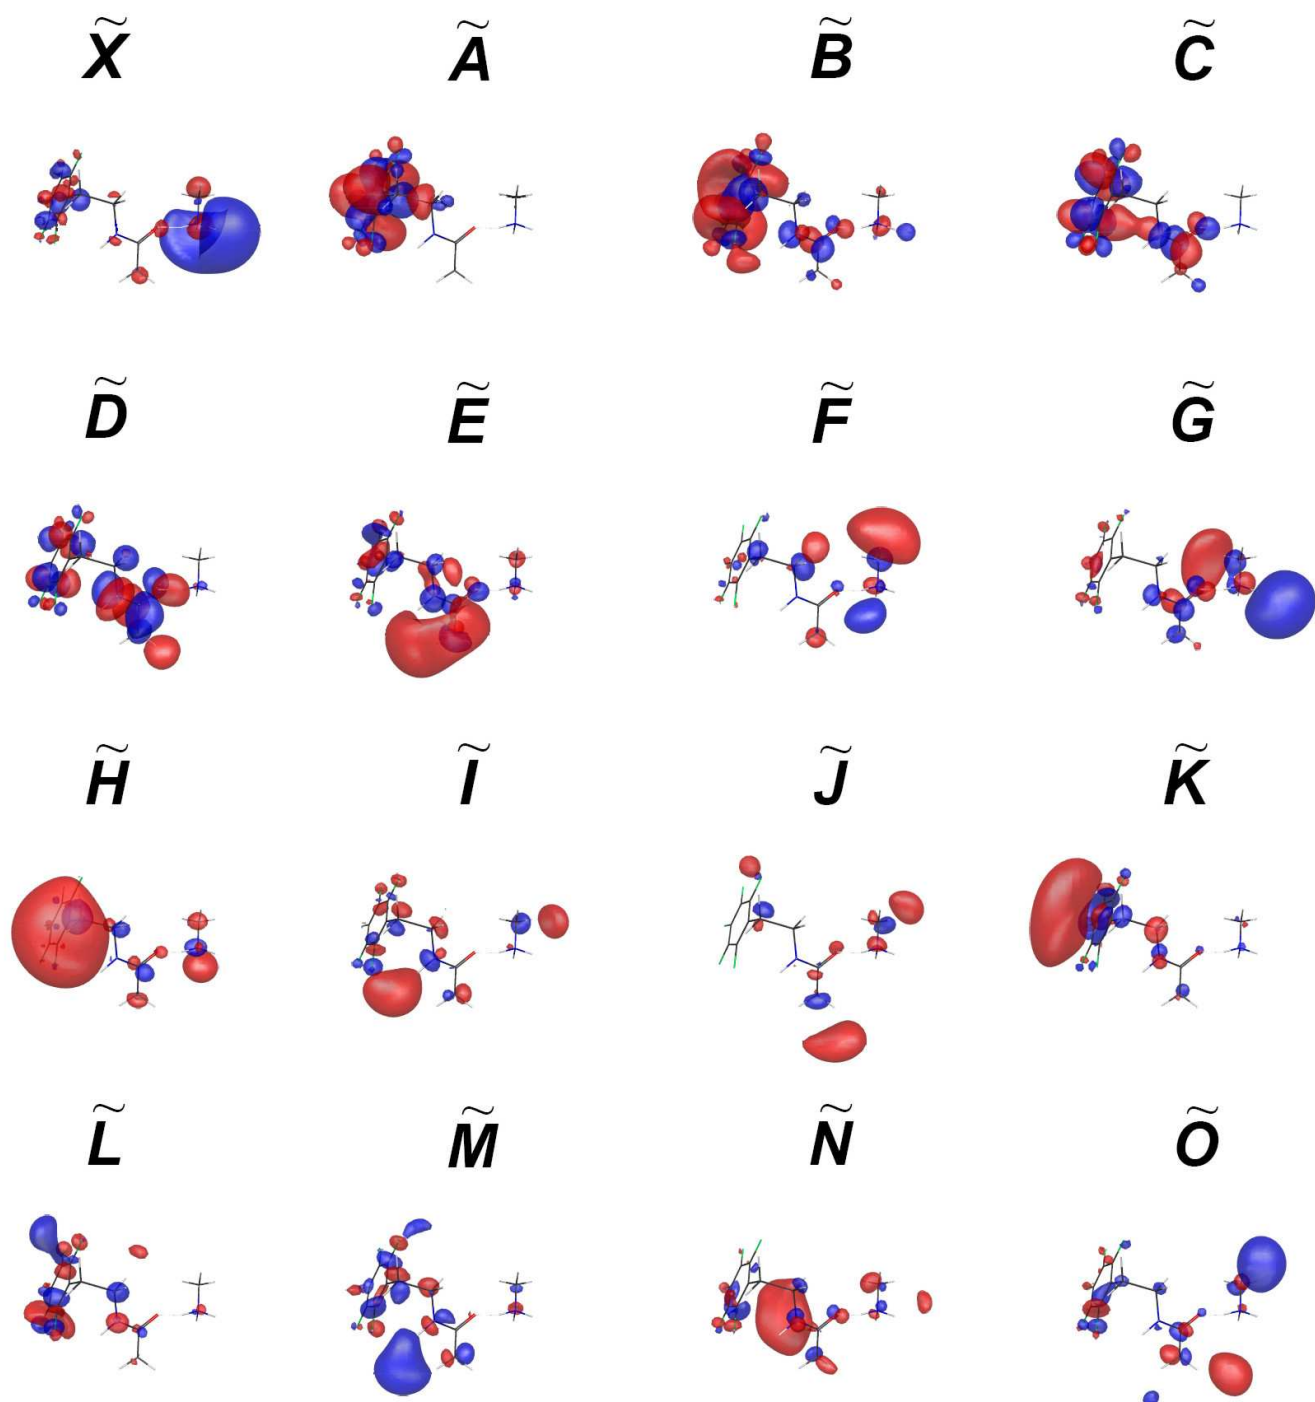

Figure S12. TDDFT excited molecular orbitals of N-(3,5-dicyanophenethyl)acetamide with the methyl ammonium complex radical (**B4**) neutral formed by vertical electron attachment at the UB3LYP/6-31++G(d,p) level.

N-(3,5-dicyanophenethyl)acetamide with  $\text{CH}_3\text{NH}_3$  (**B4**) TD-B3LYP/6-31++G(d,p)

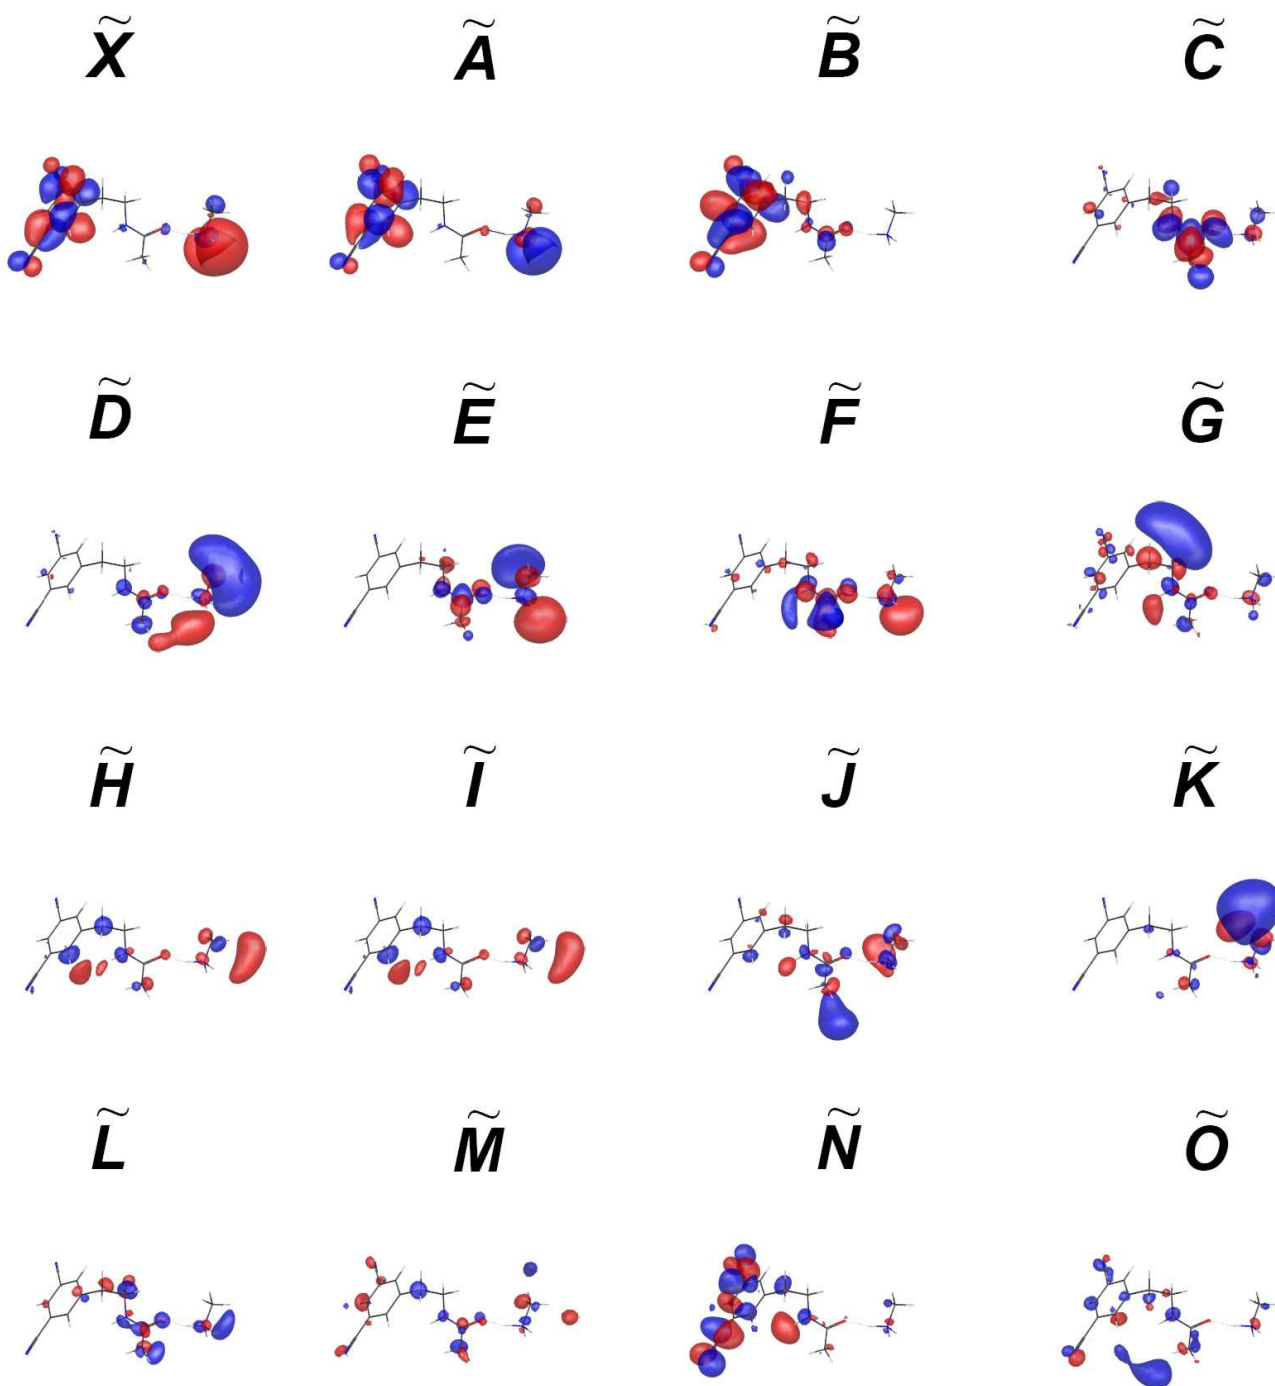

Figure S13. TDDFT excited molecular orbitals of N-(3-nitrophenethyl)acetamide with the methyl ammonium complex radical (**B5**) neutral formed by vertical electron attachment at the UB3LYP/6-31++G(d,p) level.

N-(3-nitrophenethyl)acetamide with  $\text{CH}_3\text{NH}_3$  (**B5**) TD-B3LYP/6-31++G(d,p)

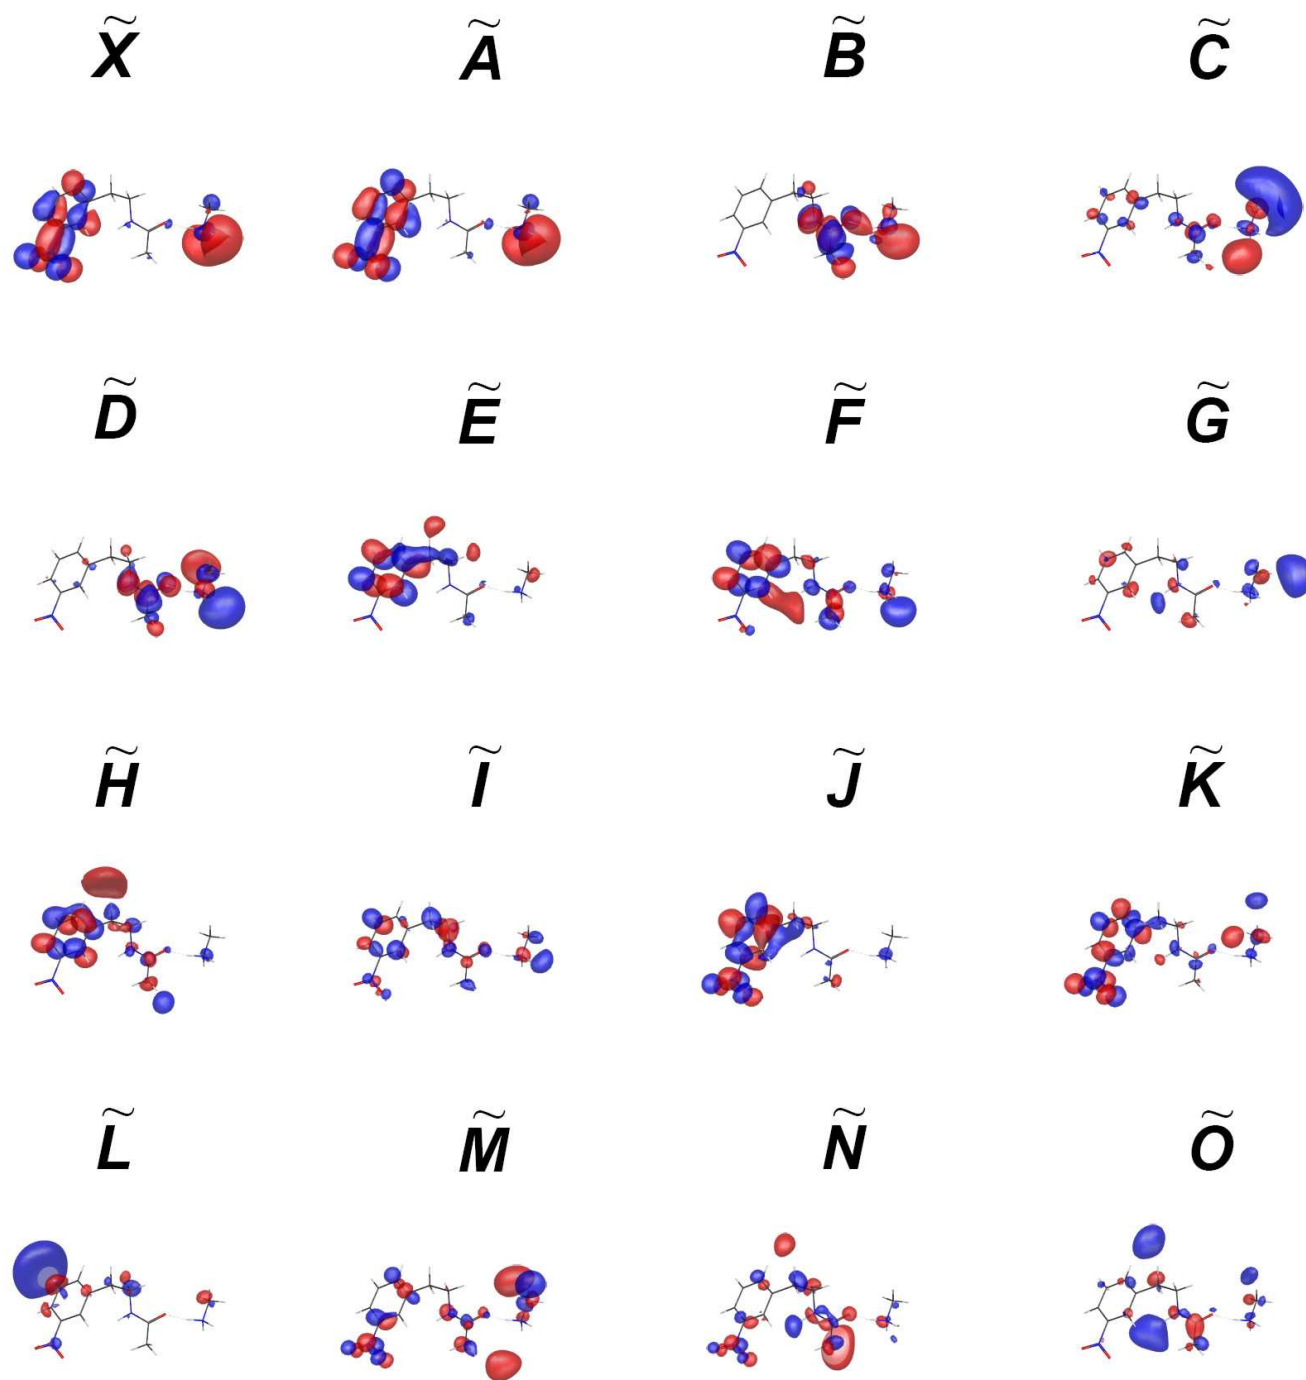

Figure S14. TDDFT excited molecular orbitals of N-(3,5-dicyanophenethyl)acetamide with the methyl ammonium complex radical (**C4**) neutral formed by vertical electron attachment at the UB3LYP/6-31++G(d,p) level.

N-(3,5-dicyanophenethyl)acetamide with  $\text{CH}_3\text{NH}_3$  (**C4**) TD-B3LYP/6-31++G(d,p)

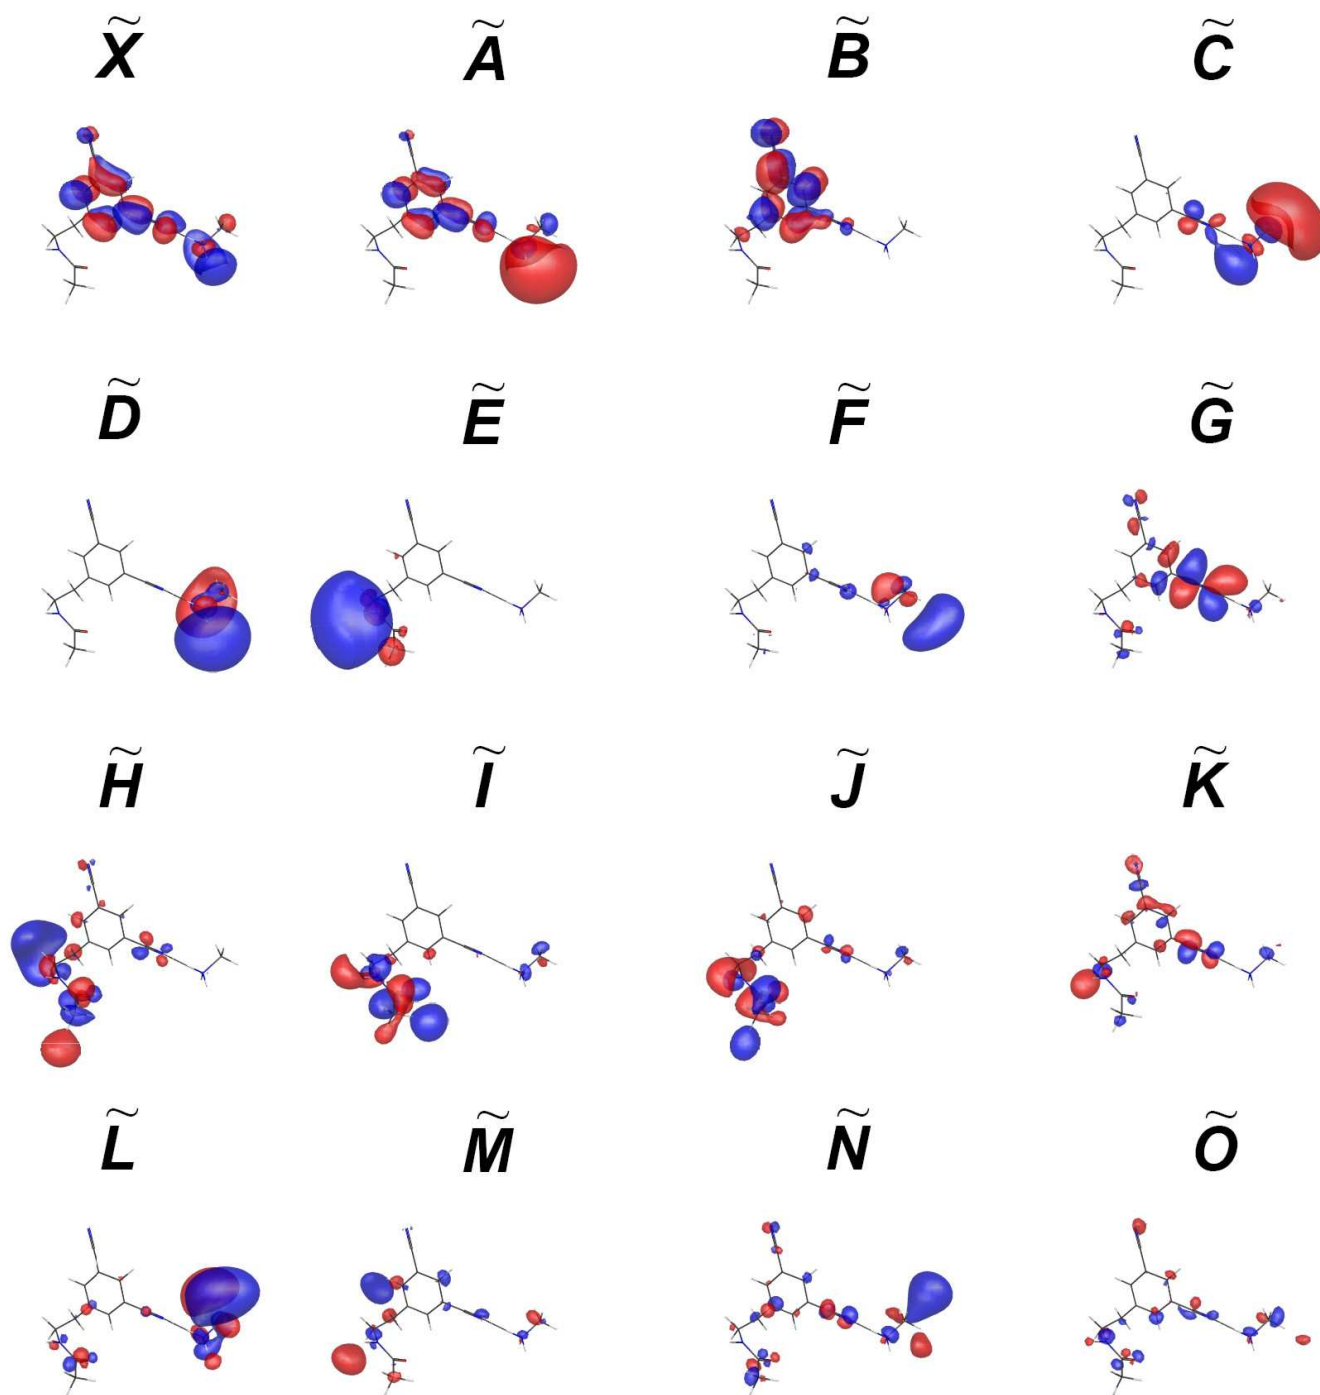

Figure S15. TDDFT excited molecular orbitals of N-(3-nitrophenethyl)acetamide with the methyl ammonium complex radical (C5) neutral formed by vertical electron attachment at the UB3LYP/6-31++G(d,p) level.

N-(3-nitrophenethyl)acetamide with CH<sub>3</sub>NH<sub>3</sub> (C5) TD-B3LYP/6-31++G(d,p)

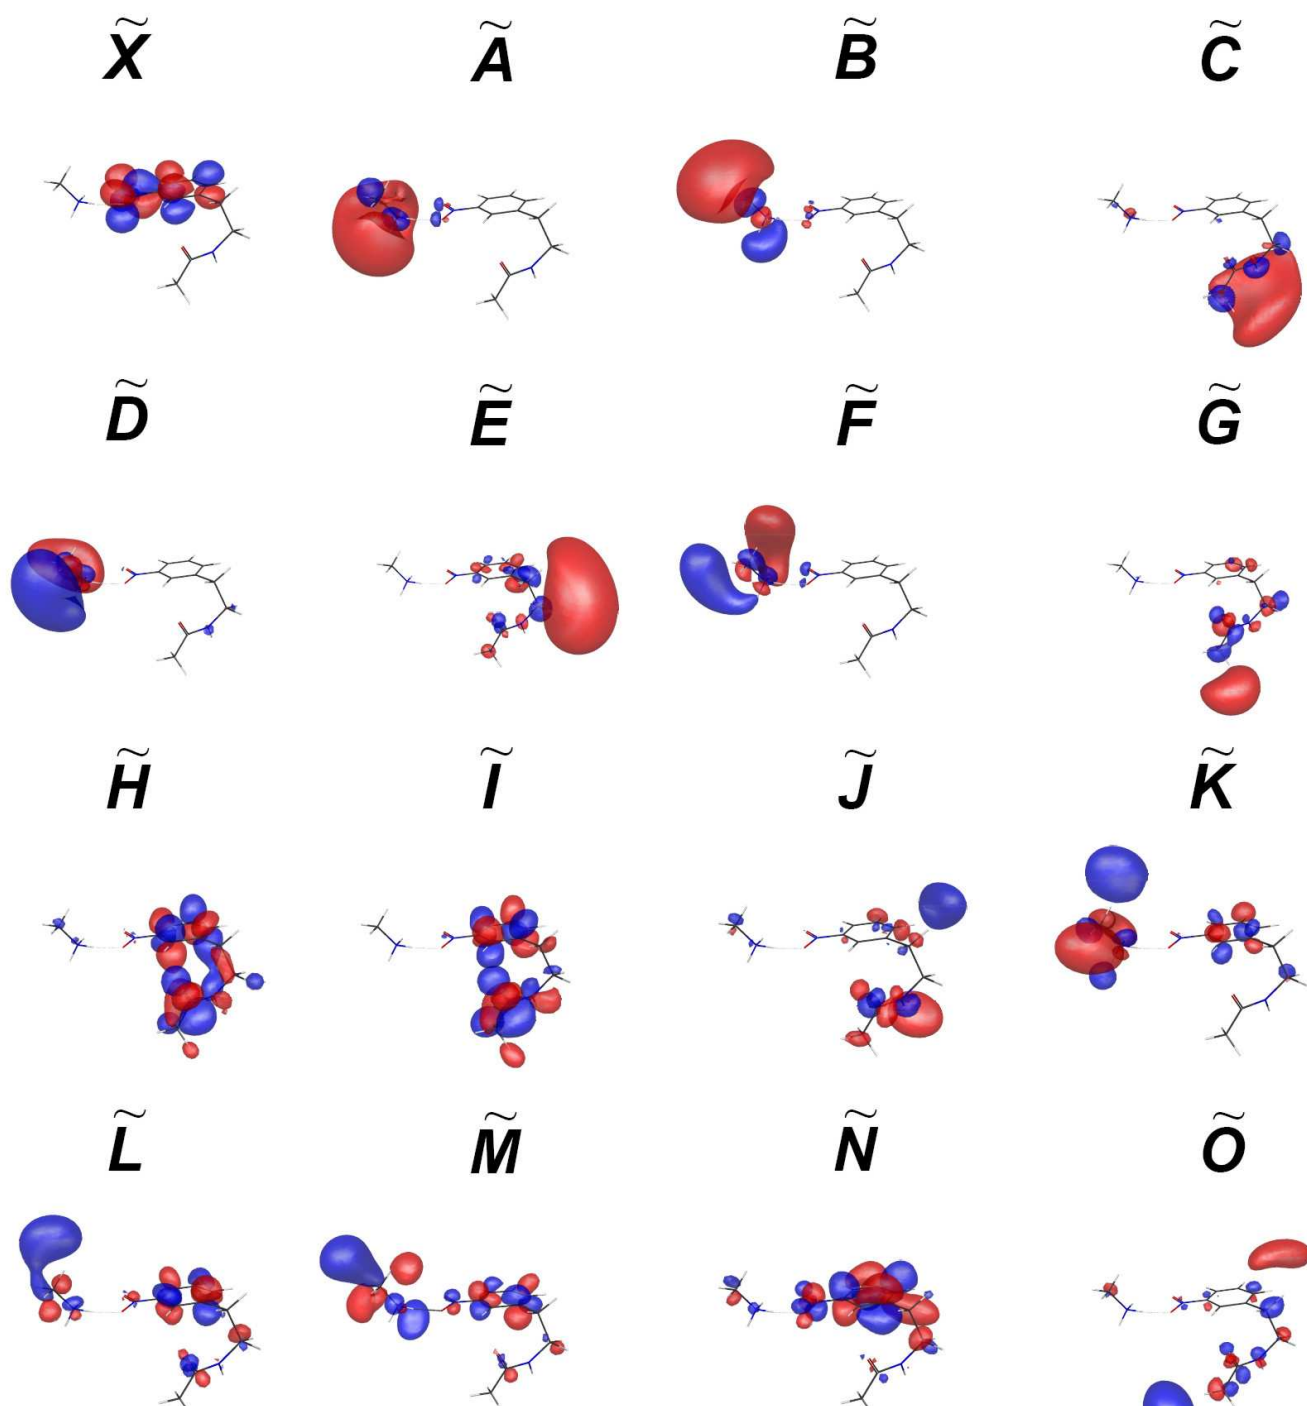

Figure S16. TDDFT excited molecular orbitals of N-(3-nitrophenyl)acetamide with the methyl ammonium complex radical (**D5**) neutral formed by vertical electron attachment at the UB3LYP/6-31++G(d,p) level.

N-(3-nitrophenyl)acetamide with  $\text{CH}_3\text{NH}_3$  (**D5**) TD-B3LYP/6-31++G(d,p)

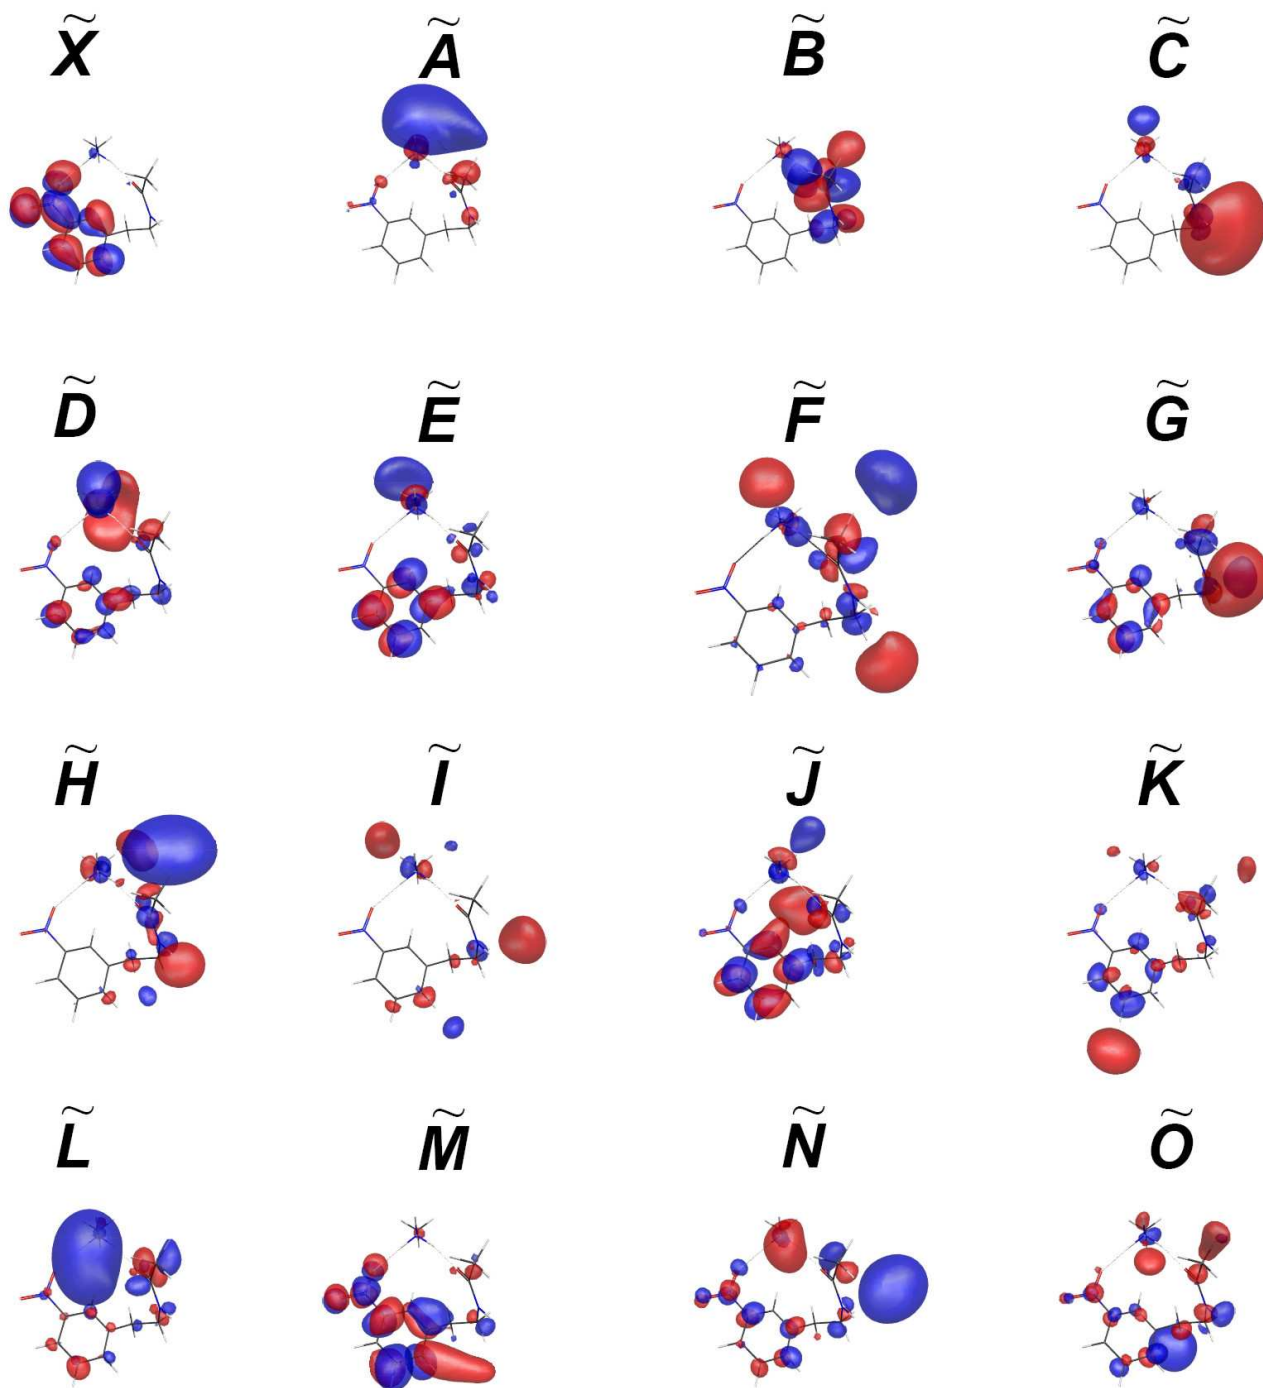

Figure S17. TDDFT excited molecular orbitals of N-(3,5-dinitrophenethyl)acetamide with the methyl ammonium complex radical (**B6**) neutral formed by vertical electron attachment at the UB3LYP/6-31++G(d,p) level.

N-(3,5-dinitrophenethyl)acetamide with  $\text{CH}_3\text{NH}_3$  (**B6**) TD-B3LYP/6-31++G(d,p)

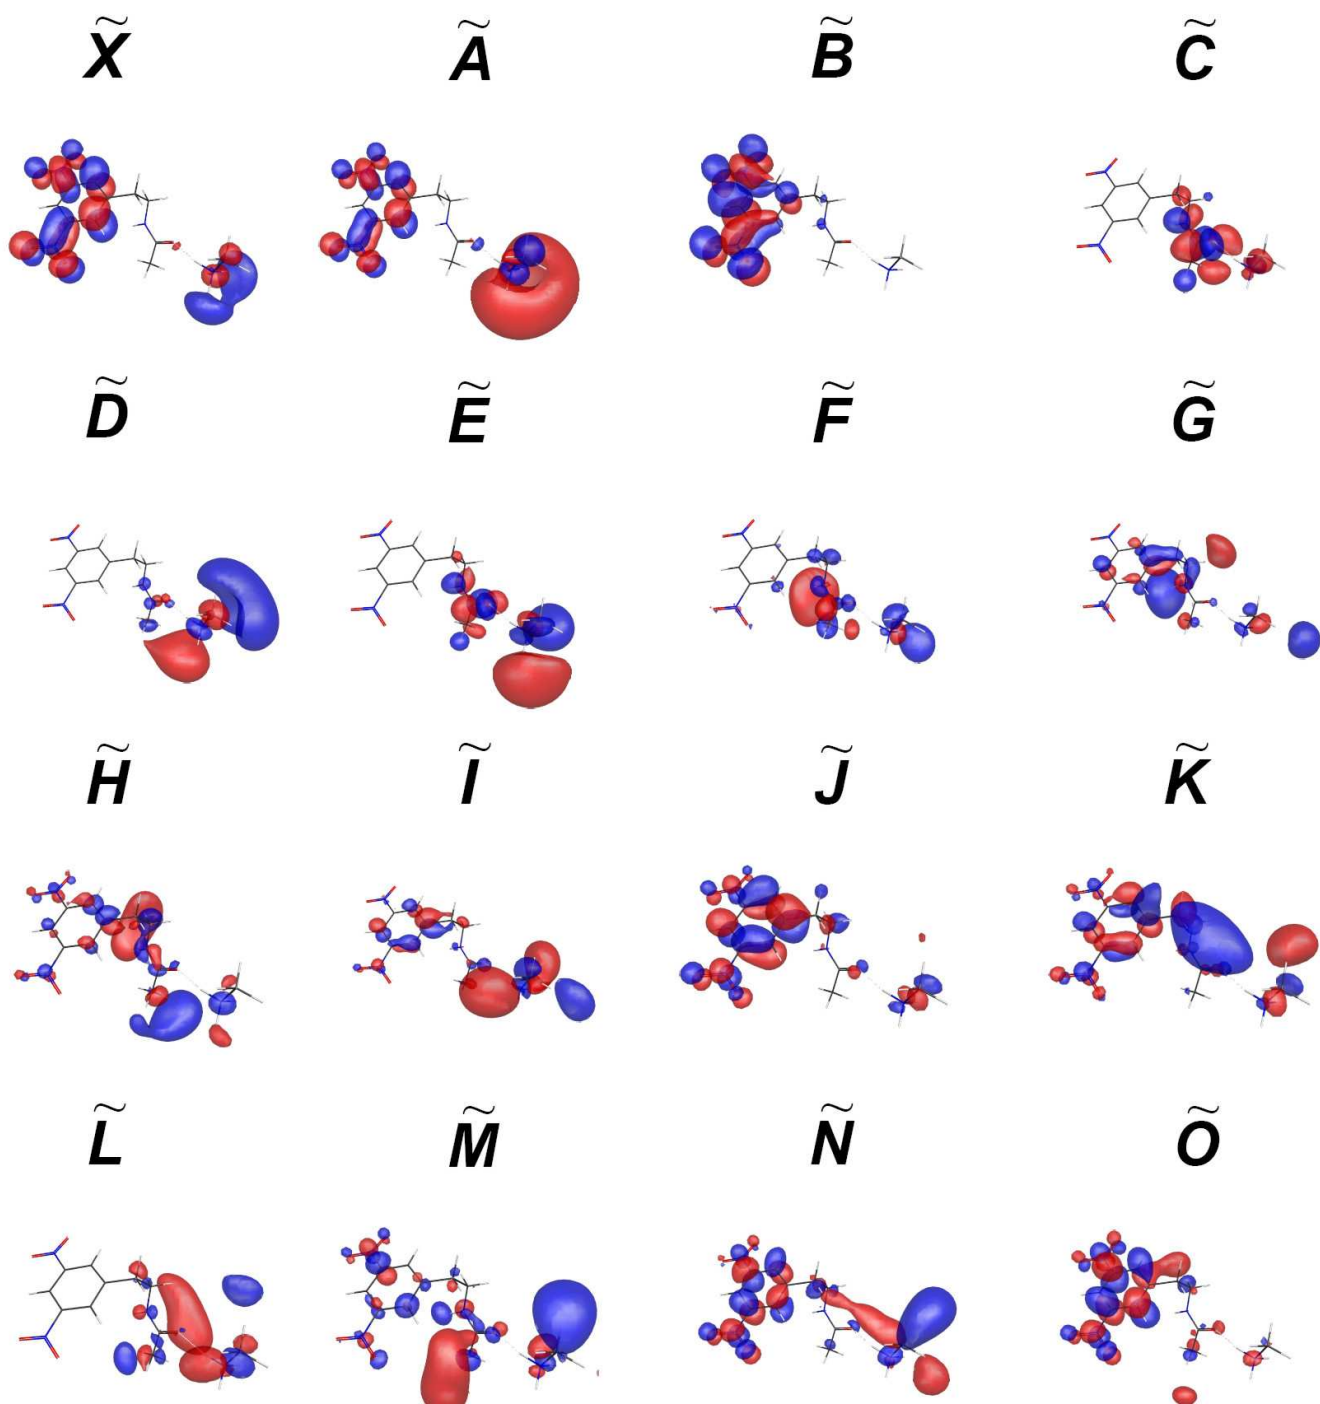

NOTE: TDDFT excited molecular orbitals of the model compounds described in Figure 8 at the UB3LYP/6-311++G(2df,p) level are omitted due to their similarity with those of orbitals at the UB3LYP/6-31++G(d,p) level. Figure 9, however, is generated by TDDFT orbitals at the UB3LYP/6-311++(2df,p) level.

## References

- (1) Schweikart, K. H.; Hanack, M.; Luer, L.; Oelkrug, D. *Eur. J. Org. Chem.* **2001**, 293-302.
